1 Nitrogen palaeo-isoscapes: Changing spatial gradients of faunal  $\delta^{15}\text{N}$  in late Pleistocene and  
2 early Holocene Europe

3  
4 Hazel Reade<sup>1\*</sup>, Jennifer A. Tripp<sup>1,#a</sup>, Delphine Frémondeau<sup>1</sup>, Kerry L. Sayle<sup>2</sup>, Thomas F.G.  
5 Higham<sup>3, #b, #c</sup>, Martin Street<sup>4</sup>, Rhiannon E. Stevens<sup>1</sup>

6  
7 <sup>1</sup>UCL Institute of Archaeology, University College London, London, United Kingdom.

8 <sup>2</sup>Scottish Universities Environmental Research Centre, , Glasgow, United Kingdom.

9 <sup>3</sup>Research Laboratory for Archaeology and the History of Art, University of Oxford, Oxford, United  
10 Kingdom.

11 <sup>4</sup>Römisch-Germanisches Zentralmuseum, Forschungsinstitut für Archäologie Kompetenzbereich  
12 Pleistozäne und Frühholozäne Archäologie, Neuwied, Germany.

13 <sup>#a</sup>Current address: Department of Chemistry, University of San Francisco, San Francisco USA

14 <sup>#b</sup>Current address: Department of Evolutionary Anthropology, Faculty of Life Sciences,  
15 University of Vienna, Vienna, Austria

16 <sup>#c</sup>Current address: Human Evolution and Archaeological Sciences (HEAS), University of Vienna,  
17 A-1030, Vienna, Austria.

18

19 \* Corresponding author

20 Email: [h.reamde@ucl.ac.uk](mailto:h.reamde@ucl.ac.uk) (HR)

## 21 **Abstract**

22 Nitrogen isotope ( $\delta^{15}\text{N}$ ) analysis of animal tissue is widely used in archaeology and  
23 palaeoecology to investigate diet and ecological niche. Data interpretations require an  
24 understanding of nitrogen isotope compositions at the base of the food web (baseline  $\delta^{15}\text{N}$ ).  
25 Significant variation in animal  $\delta^{15}\text{N}$  has been recognised at various spatiotemporal scales and  
26 linked to changes both in baseline  $\delta^{15}\text{N}$  and animal ecology. Isoscapes (models of isotope spatial  
27 variation) have proved a useful tool for investigating spatial variability in biogeochemical cycles  
28 in present-day marine and terrestrial ecosystems, but so far, their application to palaeo-data has  
29 been limited. Here, we present time-sliced nitrogen isoscapes for late Pleistocene and early  
30 Holocene Europe (c. 50,000 to 10,000 years BP) using herbivore collagen  $\delta^{15}\text{N}$  data. This period  
31 covers the Last Glacial-Interglacial Transition, during which significant variation in the terrestrial  
32 nitrogen cycle occurred. Our results show clear changes in spatial gradients of  $\delta^{15}\text{N}$  through time.  
33 Prediction of the lowest faunal  $\delta^{15}\text{N}$  values in northern latitudes after, rather than during, the  
34 Last Glacial Maximum is consistent with the Late Glacial Nitrogen Excursion (LGNE). We consider  
35 the potential of incorporating climatic covariate data into isoscape models but find their inclusion  
36 does not improve model performance. These findings have implications for investigating the  
37 drivers of the LGNE, which has been linked to increased landscape moisture and permafrost  
38 thaw, and for understanding changing isotopic baselines, which are fundamental for studies  
39 investigating diets, niche partitioning, and migration of higher trophic level animals.

## 40 **1. Introduction**

41 Nitrogen isotope ratio ( $^{15}\text{N}/^{14}\text{N}$ , expressed as  $\delta^{15}\text{N}$ ) of biological tissue is frequently used  
42 in archaeology and palaeoecology to investigate dietary behaviours, ecological niche, and past  
43 food webs (1–3). Specifically,  $\delta^{15}\text{N}$  is used to infer information about trophic structures. Obtaining  
44 reliable estimations of faunal trophic position requires understanding of the isotope  
45 compositions at the base of the food web. In other words, knowledge of the plant and soil  $\delta^{15}\text{N}$   
46 values upon which the fauna lived and fed (hereafter termed baseline  $\delta^{15}\text{N}$ ). However, this  
47 information is not usually readily obtainable from archaeological or palaeontological contexts,  
48 where the preservation of plant and/or soil material suitable for analysis can be limited.  
49 Moreover, plant and soil  $\delta^{15}\text{N}$  is highly heterogeneous and is not static in space or time,  
50 complicating inferences of baseline  $\delta^{15}\text{N}$  available to fauna.

51 Many interconnected factors exert influence on plant and soil  $\delta^{15}\text{N}$  and nitrogen cycling  
52 in the terrestrial environment (4). These relate to climate, plant functional type, mycorrhizal  
53 associations, soil characteristics, and the availability of different forms of nitrogen (5–8). On  
54 global and continental scales strong, albeit indirect, relationships exist between plant  $\delta^{15}\text{N}$  and  
55 temperature and precipitation (6,7). These relationships are also expressed over smaller spatial  
56 scales with strong altitudinal gradients (9,10). Likewise, such spatial relationships are also  
57 represented in faunal  $\delta^{15}\text{N}$  values (9,11,12). However, differences in dietary and mobility  
58 behaviours between different species, populations, and individuals introduce additional variation  
59 into the faunal  $\delta^{15}\text{N}$  signal (1,3). Indeed, while  $\delta^{15}\text{N}$  analysis of biological tissues is frequently  
60 used in archaeology and palaeoecology to investigate dietary behaviours and ecological niche,

61 our ability to decipher environmental influence from feeding behaviour remains an ongoing  
62 challenge.

63 On long timescales ( $10^3$  to  $10^5$  years) significant temporal variation has been identified in  
64 herbivore  $\delta^{15}\text{N}$  (13–25). This variation has been interpreted as representing changes to baseline  
65  $\delta^{15}\text{N}$  in response to climatic and environmental drivers. Most notably, a large decrease and then  
66 rapid increase in herbivore  $\delta^{15}\text{N}$  occurred during the Late Glacial, between approximately 17,000-  
67 and 12,000-years before present (BP) (15–17,20–23,25,26). This trend occurs in multiple species,  
68 across a wide range of mid and high latitude environments and in recent years has been termed  
69 the Late Glacial Nitrogen Excursion (LGNE) (25). As the body of late Pleistocene herbivore  $\delta^{15}\text{N}$   
70 data has grown, spatial and temporal asynchronicities in the LGNE are becoming increasingly  
71 apparent (3,25). Similarly, significant differences in species-specific  $\delta^{15}\text{N}$  variation are also  
72 recognised (1,3).

73 Through this increasing body of data, significant new opportunities to investigate  
74 spatiotemporal patterns in herbivore  $\delta^{15}\text{N}$  are emerging. Isoscape approaches (modelling of  
75 isotope spatial variation) have proved useful tools for investigating isotopic spatial variability in  
76 present-day marine and terrestrial ecosystems but are yet to be widely applied to palaeo-focused  
77 research. Here, we create time-sliced isoscape prediction maps of herbivore collagen  $\delta^{15}\text{N}$   
78 through the late Pleistocene and early Holocene periods in Europe. Time-sliced spatial  
79 interpolation offers the potential to assess changing spatial gradients of  $\delta^{15}\text{N}$  through time.  
80 Combining this analysis with high resolution climate model data (27) opens up a significant new  
81 avenue of research through which the potential drivers of the LGNE can be investigated.  
82 Improved characterisation of spatiotemporal trends in herbivore  $\delta^{15}\text{N}$  may also ultimately

83 contribute to more robust trophic structure analysis of archaeological and palaeontological  
84 materials. This is particularly important as many palaeo-focused studies use herbivore  $\delta^{15}\text{N}$ , in the  
85 absence of suitable plant samples, to infer baseline  $\delta^{15}\text{N}$  values for terrestrial food web analysis  
86 and in the interpretation of data from higher trophic level animals in relation to mobility,  
87 migration, and dietary research.

## 88 **2 Materials and Methods**

### 89 **2.1 Data compilation**

90 Newly generated and previously published herbivore collagen  $\delta^{15}\text{N}$  from late Pleistocene  
91 and early Holocene European contexts were compiled for latitudes between  $35^\circ\text{N}$  and  $60^\circ\text{N}$  and  
92 longitudes between  $10^\circ\text{W}$  and  $30^\circ\text{E}$ . Temporal scope was restricted to before the 8.2 ka BP  
93 climatic event (28), to avoid capturing human-influence on baseline  $\delta^{15}\text{N}$  that occurred through  
94 agricultural developments with the onset of the Neolithic (29,30), and after 55 ka BP, which is  
95 the current approximate limit of radiocarbon dating and calibration (31). Data come from both  
96 archaeological and palaeontological assemblages. We believe the resultant compilation captures  
97 the majority of available  $\delta^{15}\text{N}$  data from the time period and geographical region, enabling major  
98 spatial and temporal trends in  $\delta^{15}\text{N}$  to be evaluated.

99 We did not include  $\delta^{15}\text{N}$  data which had a C/N atomic ratio  $<2.9$  or  $>3.6$ , or where their  
100 publication indicated the result was unreliable. We also did not include mammoth, which have  
101 been shown to display anomalously high  $\delta^{15}\text{N}$  values when compared to other contemporaneous  
102 herbivore species (32–34), or smaller herbivores, such as those in the order *Rodentia*, which are  
103 underrepresented in the available data and are sensitive to capturing small-scale heterogeneities

104 in baseline  $\delta^{15}\text{N}$  that act independently of large-scale climatic influences due to small home range  
105 size (35–37). Any published data where taxonomic identification was uncertain was not included.  
106 All antler and tooth samples from Cervid species (*Alces alces*, *Capreolus capreolus*, *Cervus*  
107 *elaphus*, *Dama dama*, *Megaloceros giganteus*, *Rangifer tarandus*, and *Rupicapra rupicapra*)  
108 were avoided to limit seasonal biasing in the data (38–41). Finally, any data which were identified  
109 as duplicate analyses on the same sample/individual animal were omitted.

110         Compiled data were divided into 7 temporal bins (Table 1); to minimise the potential of  
111 averaging data across different climatic states/environmental conditions, whilst not overly  
112 limiting the number of data included in each time bin, we base our time bins on known major  
113 climatic events (42,43). We recognise that further climate events occurred within our selected  
114 bins, and that their expression is asynchronous across the region of study, but without a greater  
115 sample size and/or improvements in the accuracy to which sample age can be estimated, analysis  
116 at greater temporal resolution is not possible. In particular, the earliest of our two bins (early  
117 Oxygen Isotope Stage 3 (EOIS3) and late Oxygen Isotope Stage 3 (LOIS3)) capture data from  
118 multiple different climate states. For directly radiocarbon dated samples, calibration was  
119 performed using OxCal (version 4.4) (44) and the IntCal20 calibration curve (31). Dates were  
120 binned based on the median of the 95.4% probability calibrated age range. For samples where  
121 age is based on stratigraphic provenance (context dated samples), time bin assignment was  
122 based on the age of the assemblage given in the original publication of the data, or most recent  
123 age model for the site in cases where the chronological position of an assemblage had been  
124 subsequently revised. For data where a secure age assignment could not be made, or when an  
125 age assignment spanned the boundary between two temporal bins, the data were excluded. The

126 resultant dataset contained 2,718  $\delta^{15}\text{N}$  values, as reported in the Supporting Information (S1  
127 Dataset). In total the data include 479 new  $\delta^{15}\text{N}$  values and 197 new radiocarbon dates. Methods  
128 of sample preparation and analysis for the newly generated isotope data and radiocarbon  
129 determinations are provided Supporting Information (Section 1 in S3 Supporting Information).

130 **Table 1. Time bins and climate model time steps used in this study.**

| Time bin (abbreviation)              | Upper limit (year cal BP) | Lower limit (year cal BP) | Climate model time step |
|--------------------------------------|---------------------------|---------------------------|-------------------------|
| Early Holocene (EH)                  | 11,650                    | 8,190                     | 11,000                  |
| Younger Dryas (YD)                   | 12,850                    | 11,650                    | 12,000                  |
| Late Glacial Interstadial (LGI)      | 14,650                    | 12,850                    | 14,000                  |
| Last Glacial Termination (LGT)       | 19,500                    | 14,650                    | 15,000                  |
| Last Glacial Maximum (LGM)           | 27,500                    | 19,500                    | 24,000                  |
| Late Oxygen Isotope Stage 3 (LOIS3)  | 39,850                    | 27,500                    | 36,000                  |
| Early Oxygen Isotope Stage 3 (EOIS3) | 55,000                    | 39,850                    | 42,000                  |

131  
132 Elevation and bioclimatic covariate data were assembled for each  $\delta^{15}\text{N}$  sample, based on  
133 its geographic origin and time bin assignment. Elevation data was extracted from the Global  
134 Multi-Resolution Terrain Elevation Data 2010 (GMTED2010) model (45). As this elevation data is  
135 relative to present day sea level, it does not account for temporal changes in sea level or isostatic  
136 changes related to the growth and melting of ice sheets. Bioclimatic data was extracted from 0.5°  
137 resolution, biased-corrected combined HadCM3 and HadAM3H time series climate simulations  
138 (27). Data for these variables is available at a temporal resolution of 1,000-years for 21,000 years  
139 BP to present and at 2,000-year intervals prior 21,000 years BP. The distribution of samples within  
140 each time bin was evaluated using 1000-year bins and the modelled time step most closely  
141 corresponding to the greatest prevalence of data within the upper and lower limit of the event  
142 boundary was selected (Table 1).

## 143 **2.2 Data exploration and analysis**

144 All statistical analyses were performed using the R programming language (version 4.0.4)  
145 (46); the R script is provided in the Supporting Information (S2 Script). The compiled data were  
146 first evaluated for potential species-based effects on  $\delta^{15}\text{N}$  related to diet, habitat preference, and  
147 ecology. While differences were identified between species, these were unsystematic, varying by  
148 location and time period (full analysis is reported in Section 2 in S3 Supporting Information). As  
149 such, no species-based data normalisation procedures were applied prior to geostatistical  
150 analysis, although we also consider scope for species-specific analysis where sample size permits  
151 in Discussion section 4.2.

152 Spatial structures in the data were evaluated by time bin using Anselin's Local Moran's I  
153 and Global Moran's I tests. Coincident sample points were spatially jittered around  $0.1^\circ$  latitude  
154 and longitude. Spatial relationships were defined using inverse Euclidean distance. Row  
155 standardization was applied to the spatial weights to account for unequal sample distribution  
156 and corrections based on the False Discovery Rate were applied to cluster and outlier p-values to  
157 account for spatial dependency. Geostatistical analysis followed a linear mixed modelling  
158 approach, as described by (47,48). Briefly, the method uses a linear mixed-effects model (GLMM)  
159 to describe, for each observation at a given sampling location, the value of the response variable  
160 ( $\delta^{15}\text{N}$ ) to specified fixed effects, random effects and residual errors (47). Effects can include fixed  
161 spatial and bioclimatic covariates, environmental factors that vary spatially but are not  
162 considered fixed effect, and factors that differ between locations but that are not spatially  
163 correlated (47). The process involves fitting a residual dispersion model to the observed variances  
164 at each location, then fitting a mean model. The parameter estimates from these two models are



165 used to compute a predicted value and residual variance for each location across the prediction  
166 area. Various models were tested, both with and without the inclusion of bioclimatic covariate  
167 data as fixed effects. Different combinations of fixed effects for testing were selected based on  
168 known empirical relationships between  $\delta^{15}\text{N}$  and environmental variables, and on interrogation  
169 of correlations between faunal  $\delta^{15}\text{N}$  and modelled climatic data, tested with Pearson's  
170 correlation analysis (Section 3 in S3 Supporting Information). Model performance was evaluated  
171 using the conditional Akaike Information Criterion (cAIC). This analysis was conducted using the  
172 R package spaMM (49). For selected models, time binned  $\delta^{15}\text{N}$  isoscapes (interpolated prediction  
173 surfaces) were then drawn to visualise spatial variations.

## 174 **3 Results**

### 175 **3.1 Data summary and spatial structure**

176 Within the assembled data ( $n=2,718$ ) mean  $\delta^{15}\text{N}$  is  $4.1 \pm 2.0\text{‰}$ , ranging from  $-0.9\text{‰}$  to  
177  $11.9\text{‰}$  (Table 2, Fig 1). Cluster and outlier analysis (Anselin's Local Moran) demonstrates  
178 underlying spatial trends in the data, with higher  $\delta^{15}\text{N}$  values clustering at lower latitudes (e.g.  
179 northern Spain, Italy, and southwest France) and low  $\delta^{15}\text{N}$  values clustering at high latitudes and  
180 areas of significant elevation (e.g. Great Britain, Germany, and Alpine regions) (Fig 2). The pattern  
181 of spatial clustering varies between different time periods, as does the number of outliers (Fig 2,  
182 Table S3 in S3 Supporting Information). Outlying data in these instances are spatial outliers,  
183 rather than being outliers in the more standard sense of extreme observations. The spatial  
184 outliers could indicate incorrect time bin assignment based on uncertainties in age estimation or  
185 could represent true local variability in the faunal  $\delta^{15}\text{N}$  data produced by localised environmental  
186 variation and/or differences in animal ecology. The outliers may also be an artifact of our data

187 aggregation procedure, particularly for the EOIS3 and LOIS3 time bins which span long periods;  
188 it is entirely possible that some samples in close geographical proximity to one another are  
189 temporally disparate, and thus combine data representing differing climatic/environmental  
190 states. As our interest is in investigating generalised continental-scale spatial patterns, the  
191 decision was taken to omit these outliers (n=186) from further analysis. All time bins displayed  
192 significant spatial autocorrelation (Global Moran I), indicating systematic spatial variation in the  
193 data (Table S3 in S3 Supporting Information). The strength of this spatial relationship varied in  
194 time, being strongest for the Last Glacial Maximum (LGM), Last Glacial Termination (LGT), Late  
195 Glacial Interstadial (LGI) and Younger Dryas (YD) time bins, and weaker for EOIS3, LOIS3, and early  
196 Holocene (EH) time bins.

197

198 **Table 2. Summary of faunal  $\delta^{15}\text{N}$  by time bin**

| Age Bin (abbreviation)          | n   | Mean | Standard deviation | Median | Minimum | Maximum |
|---------------------------------|-----|------|--------------------|--------|---------|---------|
| Early Holocene (EH)             | 176 | 4.7  | 1.6                | 4.6    | 1.5     | 10      |
| Younger Dryas (YD)              | 133 | 3.4  | 1.3                | 3.4    | 0.2     | 7.6     |
| Late Glacial Interstadial (LGI) | 485 | 3.1  | 1.4                | 2.9    | -0.5    | 8.4     |
| Last Glacial Termination (LGT)  | 602 | 3.3  | 1.9                | 2.9    | -0.9    | 11.9    |
| Last Glacial Maximum (LGM)      | 339 | 4    | 1.5                | 3.8    | 1       | 8       |
| Late OIS 3 (LOIS3)              | 466 | 5.3  | 2                  | 5      | 0.8     | 11.2    |
| Early OIS 3 (EOIS3)             | 517 | 4.7  | 1.6                | 4.5    | 1       | 11.5    |

199

200 **Figure 1. Boxplot of faunal  $\delta^{15}\text{N}$ , plotted by time bin.**

201

202 **Figure 2. Visualisation of cluster (circles) and outlier (stars) analysis. High  $\delta^{15}\text{N}$  values are**  
203 **indicated in red, low  $\delta^{15}\text{N}$  values are indicated in blue.**

204

### 205 **3.2 Geostatistical analyses: Isoscapes**

206 Spatial interpolation was first investigated without the inclusion of climate data as  
207 covariate fixed effects (Fig 3). Prediction surfaces show the development of a north-south  
208 gradient in  $\delta^{15}\text{N}$  during LOIS3, which becomes gradually more pronounced through the LGM, LGT  
209 and LGI. This contrasts to a lack of obvious spatial patterning of predicted  $\delta^{15}\text{N}$  in the earlier EOIS3  
210 and later YD and EH time bins. Notably, the amplification of the latitudinal gradient, particularly  
211 during the LGT and LGI, appears to primarily be driven by a decrease in  $\delta^{15}\text{N}$  in northerly  
212 locations, rather than by an increase in  $\delta^{15}\text{N}$  in southerly locations. The lowest  $\delta^{15}\text{N}$  values, which  
213 are observed at northern latitudes only during the LGT and LGI, are absent in the LGM (the coldest  
214 part of the last glacial cycle), suggesting that the trend cannot be explained by temperature  
215 change alone.

216 Model performance evaluated through prediction variance surfaces (Fig 4) show that  
217 variance ranges from  $>1.5\text{‰}$  across much of the prediction area for LOIS3 to  $<1\text{‰}$  for EOIS3,  
218 LGM, LGT, LGI. Variance is lowest closest to sample locations, but otherwise does not appear to  
219 be spatially structured. Comparing predicted  $\delta^{15}\text{N}$  values to observed  $\delta^{15}\text{N}$  values at sample  
220 locations shows that models for all time periods perform well, explaining between 47 and 91%  
221 of the variance, with Root Mean Squared Errors (RMSE) ranging from 0.40‰ to 1.11‰ (Fig 5).

222

223 **Figure 3.  $\delta^{15}\text{N}$  isoscape prediction surfaces, modelled using random effects only.**  
224 **Palaeocoastline data from (79), ice sheet extent from (80) and modern coastline from (81), as**  
225 **detailed in S4 Base maps for figures.**

226

227 **Figure 4.  $\delta^{15}\text{N}$  isoscape variance surfaces, modelled using random effects only. Base maps as**  
228 **described in Fig 3 caption.**

229

230 **Figure 5. Comparison of observed site mean  $\delta^{15}\text{N}$  versus model predicted  $\delta^{15}\text{N}$ , for the models**  
231 **using random effects only.**

232

233 To explore possible relationships between spatial variation in faunal  $\delta^{15}\text{N}$  and climate,  
234 correlations between site-mean  $\delta^{15}\text{N}$  and modelled terrestrial climatic variables from Beyer et al  
235 (2020), as well as elevation, were tested (Table S4.1 and S4.2 in S3 Supporting Information).  
236 Notable differences occur in correlations between  $\delta^{15}\text{N}$  and climatic variables across different  
237 time bins and no single variable showed significant correlation with  $\delta^{15}\text{N}$  in every time bin.  
238 Importantly, no significant correlations were identified for the early OIS 3. In selecting which  
239 variables and combinations of variables to test as fixed effects in the isoscape models, we  
240 considered known empirical relationships between  $\delta^{15}\text{N}$  and climate in the modern environment,  
241 issues of collinearity between climatic variables, and the strength of correlations between faunal  
242  $\delta^{15}\text{N}$  and modelled climatic data (full analysis reported in Section 4 in S3 Supporting Information).  
243 From this analysis the variables selected as fixed effects for model testing were mean annual  
244 temperature (MAT), mean annual precipitation (MAP), temperature of the warmest quarter,  
245 precipitation of the warmest quarter and precipitation of the coldest quarter (Fig S4.2 – S4.6 in  
246 S3 Supporting Information). Different combinations of these variables were considered and  
247 model performance was evaluated using the cAIC (Table 3 and Section 5 in S3 Supporting

248 Information). Given that the strength of correlation with covariate data differed by time bin, it  
 249 was unsurprising to find that the best fit model also differed by time bin. For all time bins, models  
 250 including bioclimatic fixed effects performed better than the model where no fixed effects were  
 251 included, with the exception of the LGI. However, for all time bins the changes in the cAIC  
 252 criterion between different models were for the most part extremely small (Table 3), suggesting  
 253 most models performed similarly well, and the inclusion of bioclimatic variables did not  
 254 significantly improve model performance for any time bin.

255  
 256 **Table 3. Model fit results (cAIC) for faunal nitrogen isoscape prediction models. Fixed effects**  
 257 **tested include mean annual temperature (MAT), mean annual precipitation (MAP),**  
 258 **temperature of the driest quarter (temp.dry), temperature of the warmest quarter**  
 259 **(temp.warm), and precipitation of the warmest quarter (precip.warm). A spatially-structured**  
 260 **random effect following a Matérn correlation structure using latitude and longitude to**  
 261 **compute distances between observations (spatial), and an uncorrelated random effect**  
 262 **identical for all observations from the same location (site) were also included. Further fit**  
 263 **results are given in Supplementary Information 4. The best performing model, based on cAIC,**  
 264 **is highlighted in red.**

| Model parameters                     | cAIC         |             |              |              |      |              |              |
|--------------------------------------|--------------|-------------|--------------|--------------|------|--------------|--------------|
|                                      | EH           | YD          | LGI          | LGT          | LGM  | LOIS3        | EOIS3        |
| No fixed effects + spatial + site    | 213.3        | 77.9        | <b>110.5</b> | 132.6        | 54.1 | 170.2        | 181.2        |
| MAT + spatial + site                 | 212.7        | 78.0        | 110.8        | <b>131.8</b> | 54.2 | 170.8        | <b>181.0</b> |
| MAP + spatial + site                 | 210.9        | 77.9        | 110.9        | 132.9        | 54.3 | <b>169.3</b> | 181.9        |
| MAT + MAP + spatial + site           | <b>210.3</b> | 78.1        | 111.2        | 132.4        | 54.3 | 169.3        | 181.1        |
| MAT + MAP + MAT:MAP + spatial + site | 210.9        | 78.3        | 111.6        | 132.5        | 54.8 | 169.7        | 182.0        |
| temp.warm + spatial + site           | 211.9        | <b>77.7</b> | 110.7        | 131.9        | 56.6 | 170.4        | 181.8        |
| precip.warm + spatial + site         | 211.4        | 77.9        | 110.8        | 133.1        | 54.0 | 169.4        | 181.6        |
| precip.cold + spatial + site         | 211.9        | 78.0        | 111.1        | 132.9        | 53.7 | 169.9        | 182.2        |

|                                                        |       |      |       |       |             |       |       |
|--------------------------------------------------------|-------|------|-------|-------|-------------|-------|-------|
| temp.warm + precip.warm + spatial + site               | 210.8 | 77.8 | 111.1 | 132.2 | 56.4        | 169.8 | 182.2 |
| temp.warm + precip.cold + spatial + site               | 211.2 | 78.0 | 111.2 | 132.1 | 55.6        | 170.0 | 182.7 |
| Precip.cold + precip.warm + spatial + site             | 211.4 | 78.1 | 111.3 | 133.3 | <b>52.9</b> | 169.5 | 182.5 |
| temp.warm + precip.cold + precip.warm + spatial + site | 211.2 | 78.0 | 111.4 | 132.4 | 54.9        | 169.8 | 183.0 |

265

266

267

268

269

270

271

272

273

274

275

276

277

278

279

280

281

282

Figures 6, 7 and 8 present results from the best performing model incorporating climatic fixed effect(s) for each time bin. In very general terms, the best fit model incorporating climatic fixed effect(s) (Fig 6) predicted somewhat similar continental-scale spatial patterns of  $\delta^{15}\text{N}$  as the corresponding model without fixed effects (Fig 3), although with some notable differences. Importantly, the strength of expression of the north-south gradients in  $\delta^{15}\text{N}$  is more muted when climatic variables are incorporated, particularly for LOIS3, the LGT, and the LGI. Greater localised variation in  $\delta^{15}\text{N}$  is also apparent when climatic variables are incorporated, related to localised spatial climatic gradients, such as those that exist across areas of varying topography (e.g. the Alps mountain range). The prediction variance surfaces (Fig 7) show only minor differences when compared to those for models without fixed effect (Fig 4). When predicted and observed  $\delta^{15}\text{N}$  values are compared for models incorporating climatic fixed effects (Fig 8), all performed slightly worse than those without fixed effects (Fig 5), with  $r^2$  values ranging from 0.31 to 0.91 and RMSE ranging from 0.51‰ to 1.22‰.

**Figure 6.  $\delta^{15}\text{N}$  isoscape prediction surfaces, best performing model incorporating climatic fixed effect(s) for each time bin. Base maps as described in Fig 3 caption.**

283 **Figure 7.  $\delta^{15}\text{N}$  isoscape variance surfaces, best performing model incorporating climatic fixed**  
284 **effect(s) for each time bin. Base maps as described in Fig 3 caption.**

285

286 **Figure 8. Comparison of observed site mean  $\delta^{15}\text{N}$  versus model predicted  $\delta^{15}\text{N}$ , best**  
287 **performing model incorporating climatic fixed effect(s) for each time bin.**

## 288 **4. Discussion**

### 289 **4.1 Isoscape mapping using faunal isotope data**

290 This study represents the first (to our knowledge) study to create temporally-layered  
291 isoscapes using palaeo-data. While the application of isoscape approaches in modern terrestrial  
292 environmental and ecological research are now relatively widespread (50), the use of isoscape  
293 modelling in palaeo-focused research has so far been considerably more limited (51–55). In part,  
294 this can be attributed to the additional complexities that palaeo-isoscapes must contend with;  
295 while plant, soil or animal  $\delta^{15}\text{N}$  is a spatially and temporally continuous variable, our means of  
296 sampling such data is inescapably discretized (i.e. each sample represents a discrete temporal  
297 and spatial interval). The discretization is many orders of magnitude larger in fossil than in  
298 modern data ensembles, owing to the uncertainties in establishing calendar age estimates for  
299 fossil samples, the need to consider samples of different ages together as a single temporal unit,  
300 and the assumptions that must be made about the spatial resolution and provenance of the  
301 sample. As such, isoscapes constructed using palaeo-data will always have a certain level of  
302 unavoidable uncertainty inbuilt.

303           Likewise, probably owing to the complex nature of the terrestrial nitrogen cycle and  
304 relative data paucity compared to other environmental systems (e.g. oxygen and hydrogen in the  
305 hydrological cycle), the application of geostatistical approaches specifically toward modern  
306 terrestrial nitrogen isotope data have so far also been comparatively limited (5,56–58). Part of  
307 the difficulty in assessing regional/global scale gradients in  $\delta^{15}\text{N}$  is that the nitrogen isotope  
308 composition of soils and plants may be highly heterogeneous at very localised spatial and/or  
309 temporal scales (59). In this regard, relying on bone collagen data may actually be advantageous;  
310 herbivores act as natural integrators, providing a measure of ecosystem nitrogen that is spatially  
311 averaged over the extent of the animal's home range, and temporally averaged over a number  
312 of years (temporal resolution depends on bone collagen turnover rate, but is typically in the order  
313 of several years). Therefore, while the use of faunal  $\delta^{15}\text{N}$  to trace changes in underlying  
314 environmental  $\delta^{15}\text{N}$  introduces noise from dietary and behavioural differences, it also offers a  
315 unique means to assess ecosystem-scale variation in  $\delta^{15}\text{N}$ , particularly in past environments,  
316 where other sampling opportunities are lacking or inadequate.

317           A recent study by Barrientos et al. (52) illustrated the potential of using archaeological  
318 bone collagen  $\delta^{15}\text{N}$  data in palaeo-isoscape mapping. The resultant Inverse Distance Weighted  
319 (IDW) isoscapes demonstrated how geostatistical approaches, rooted in community and trophic  
320 ecology, could be applicable to addressing archaeological questions (52). In this study we have  
321 progressed these ideas, demonstrating the possibility of applying more complex geostatistical  
322 methods, which, unlike a IDW approach, allow for errors and uncertainties to be quantified and  
323 covariate data to be incorporated. The approach followed here demonstrates a means to  
324 consider variations in spatial gradients in  $\delta^{15}\text{N}$  through time.



325           The prediction models presented provide a method to quantitatively estimate site-  
326 averaged herbivore  $\delta^{15}\text{N}$  in the past, at locations where empirical data is absent. While such  
327 isoscape approaches should not replace efforts to establish local and time-specific baseline data  
328 through empirical sampling, they offer a complementary source of information through which  
329 past environments can be explored. The two approaches need to work hand-in-hand, as  
330 continued efforts to generate empirical data will ultimately lead to improvements in the  
331 predictive power of isoscape models. While the nature of fossil sample material dictates that  
332 there will always be limitations in the temporal and spatial accuracy of such an approach, the  
333 value of such predictive maps for investigating long term continental-scale changes in the  
334 terrestrial nitrogen cycle, and natural- and anthropogenically-driven impacts on said cycle,  
335 should not be understated.

## 336 **4.2 Species-specific spatial gradients of $\delta^{15}\text{N}$ variability**

337           One of the primary challenges in understanding the variability present in fossil  $\delta^{15}\text{N}$  data  
338 is to distinguish between environmental effects and the effects of dietary and ecological  
339 differences between species, and the variability that can occur in both effects across space and  
340 time. Some previous studies of environmental change restricted analyses to single species to limit  
341 variability introduced by dietary ecology (e.g.(17,23)). Others took data from more than one  
342 species with similar dietary characteristics and applied data normalisation/transformation  
343 procedures (e.g.(25)). The former severely limits the size of the data set available for analysis,  
344 while the latter, when used to infer environmental change, relies on the assumption that species'  
345 dietary behaviour and isotope niche relative to one another have remained stable through time.  
346 Empirical evidence suggests this assumption is problematic (1,3,60,61). Indeed, species most

347 capable of dietary flexibility are often most successful at adapting to changes in local  
348 environmental conditions (62,63), and thus it is these species that are most abundant in the fossil  
349 record and remain present across major climate transitions. In this study we applied no  
350 correction or data transformation procedure to account for species-based differences, and  
351 instead considered only site mean  $\delta^{15}\text{N}$  values in the models thus far presented. Our primary  
352 reasoning for this is that while species-based differences are present in the data, neither the  
353 option of restricting analysis to a single species or applying species-based corrections to a  
354 multiple-species analysis were appropriate in this instance.

355         Nonetheless, it is important to consider the implications of our approach compared to  
356 model outputs when different species are considered independently. While the data is not of  
357 sufficient quantity to enable species-specific isoscapes to be constructed for all time bins and  
358 species, they can be considered in some contexts. Our data is dominated by 3 species: horse  
359 (25%), reindeer (24%) and red deer (30%), and while their geographical distribution varies  
360 considerably in time (Fig S6.1 in in S3 Supporting Information), data is of sufficient quantity and  
361 comparable geographic distribution to consider isoscape models for each of these species for the  
362 LGT and LGI time bins (Fig 9 and 10).

363

364 **Figure 9.  $\delta^{15}\text{N}$  isoscape prediction surfaces for *Equus sp.*, *Rangifer tarandus*, and *Cervus elaphus***  
365 **for the Last Glacial Termination and Late Glacial Interstadial time bins. Linear mixed models**  
366 **were run without the addition of environmental covariate data. Base maps as described in Fig**  
367 **3 caption.**

368

369 **Figure 10.  $\delta^{15}\text{N}$  isoscape variance surfaces for *Equus sp.*, *Rangifer tarandus*, and *Cervus elaphus***  
370 **for the Last Glacial Termination and Late Glacial Interstadial time bins. Linear mixed models**  
371 **were run without the addition of environmental covariate data. Base maps as described in Fig**  
372 **3 caption.**

373

374 From this analysis horse can be seen to display the strongest spatial gradients in  $\delta^{15}\text{N}$  in  
375 both the LGT and LGI, with lowest values in the north and northwest of the interpolation area,  
376 and highest values in the south. North-south gradients in  $\delta^{15}\text{N}$  are also seen in the reindeer and  
377 red deer data but are more muted. While these differences likely stem from differences in dietary  
378 ecology and mobility (see Section 2 of S3 Supporting Information for more detailed discussion),  
379 the implications for this in our objective of understanding large-scale changing spatial gradients  
380 in  $\delta^{15}\text{N}$  requires consideration. Deciphering the relative contributions of dietary behaviour and  
381 environmental influence on the  $\delta^{15}\text{N}$  signal is extremely challenging, and it may not be possible  
382 to fully disentangle the two by measuring bulk collagen  $\delta^{15}\text{N}$  alone; as localised environmental  
383 conditions exert strong influence on feeding behaviours and diet, the two are inextricably linked.  
384 In the context of late Pleistocene northern Europe, tooth meso- and microwear analysis confirm  
385 horse most likely had a graze-dominated diet, red deer a browse-dominated diet, and reindeer a  
386 mixed diet (63). However, the extent to which these different plant types in the diet can be  
387 equated to isotopically distinct diets is debateable. As Schwartz-Narbonne et al. (3) discuss, while  
388 at the most generalised scale patterns of  $\delta^{15}\text{N}$  in tundra ecosystems can be summarised as  
389 shrub < lichen < herb < fungi, there are examples where this does not hold true in either space  
390 or time (64–67). If this generalised plant type  $\delta^{15}\text{N}$  pattern was taken at face value and applied

391 to the late Pleistocene European herbivores, a pattern of red deer < reindeer < horse would be  
392 expected; in fact, the opposite pattern is identified.

393 Part of the difficulty in relating faunal  $\delta^{15}\text{N}$  to plant  $\delta^{15}\text{N}$  is the issue of scale. Plant  $\delta^{15}\text{N}$  is  
394 highly heterogenous and is related to N availability and a plant's ability to utilise and acquire  
395 different forms of N, which are influenced by root depth and mycorrhizal association, as well as  
396 environmental factors which can vary on a sub-annual scale (4). In comparison, one collagen  
397  $\delta^{15}\text{N}$  analysis represents a homogenised data point, averaging a multitude of plant  $\delta^{15}\text{N}$  values at  
398 a spatial scale equivalent to the animal's home range (which can vary considerably between  
399 species) and a temporal scale of several years. A further consideration in interpreting the faunal  
400 signal, particularly that of reindeer, is the inclusion of lichen in the diet. Lichens fix nitrogen from  
401 the atmosphere, and therefore species consuming a significant proportion of lichen may display  
402  $\delta^{15}\text{N}$  signatures decoupled from environmental-mediated changes in vegetation  $\delta^{15}\text{N}$ . However,  
403 the amount of lichen consumed, and its contribution to the reindeer bone collagen  $\delta^{15}\text{N}$  signal  
404 cannot be easily discerned. For example, significant differences in the amount of lichen  
405 incorporated into reindeer diets between the LGI and YD in northern Europe, based on tooth  
406 meso- and micro-wear analysis, did not translate to differences in bone collagen  $\delta^{15}\text{N}$  (68). As  
407 such, we decided that the exclusion of reindeer from the data, which would have significantly  
408 reduced the sample size, was not justified in this instance.

409 In the future, with ever increasing amounts of faunal isotope data and radiocarbon dates  
410 being published, it is hoped that species-specific geostatistical analyses can be further explored.  
411 Such investigations would undoubtedly be of great benefit to furthering our understanding the

412 isotope ecology and niche overlap/partitioning of key herbivore species, and of the complex and  
413 competing influences of environment and ecology on faunal  $\delta^{15}\text{N}$ .

### 414 **4.3 Evaluating spatial gradients and drivers of $\delta^{15}\text{N}$ variability in the** 415 **past**

416 The results presented here provide the means to visualise the spatiotemporal character  
417 of changing faunal  $\delta^{15}\text{N}$ , and, when combined with the recent publication of high-resolution  
418 climate model data (27), interrogate potential links between faunal  $\delta^{15}\text{N}$  and climatic variables  
419 at a resolution not previously achievable.

420 Our results show spatial gradients in faunal  $\delta^{15}\text{N}$  appear in late OIS 3, strengthening during  
421 the Last Glacial Maximum, Last Glacial Termination and Late Glacial Interstadial. This compares  
422 to early OIS 3 and the Younger Dryas and Holocene where strong spatial gradients are absent.  
423 The amplification of the latitudinal gradient appears to reach its maximum during the Late Glacial  
424 Interstadial, when the lowest  $\delta^{15}\text{N}$  values (<2‰) are predicted. The fact that these lowest values  
425 occur during the Late Glacial Interstadial, a relatively warm climatic period, and not during the  
426 coldest part of the last glacial cycle, show that temperature is not the primary driver of variation.  
427 We draw attention to the location of the lowest predicted  $\delta^{15}\text{N}$  values, in regions that were either  
428 glaciated or were immediately proximal to the British, Scandinavian, and Alpine ice sheets during  
429 the LGM (Fig 3 and 6). It is noteworthy that  $\delta^{15}\text{N}$  values of <2‰ only occur within the zone of  
430 continuous permafrost that existed across Europe at the height of the last glacial (69), and their  
431 occurrence within this zone is only after the onset of deglaciation and thaw. The role of increased  
432 landscape moisture driven by increased precipitation and increased input of meltwater from  
433 icesheets and thawing permafrost has long been suggested as a driver of the LGNE

434 (17,18,22,23,25), and the results presented here add further weight to this interpretation. This  
435 environmental change would have both altered the floral community in such landscapes and  
436 altered the form and source of nitrogen available to vegetation, with microbially-mediated  
437 changes in N cycling between pools of  $\text{NO}_3^-$  (nitrate),  $\text{NH}_4^+$  (ammonium), and  $\text{N}_2$  (elemental  
438 nitrogen) resulting in changing plant  $\delta^{15}\text{N}$  (70–72). Biogeochemical cycles and microbial activity  
439 in cold environments may be particularly sensitive to changes in soil moisture content,  $\text{O}_2$  status,  
440 and temperature (70,73,74). In this regard, the use of geostatistical interpolation to reconstruct  
441 changing  $\delta^{15}\text{N}$  spatiotemporal gradients may provide the means to further interrogate sub-  
442 continental scale processes of permafrost thaw and changing landscape moisture during the  
443 terminal Pleistocene in Europe. If increased data availability in coming years were to enable  
444 faunal isoscape mapping at an increased temporal resolution for the late glacial, it would  
445 certainly be of interest to compare these to contemporaneous maps of changes in the  
446 distribution of European permafrost.

447         Regarding the absence of spatial gradients in the early OIS 3, Younger Dryas and early  
448 Holocene time bins, while the previously discussed problems of data aggregation across multiple  
449 climatic events may explain the muted gradients in early OIS 3, this explanation is unsatisfactory  
450 for the early Holocene and Younger Dryas. A more plausible explanation, at least for the Early  
451 Holocene is that the reduced spatial gradient in  $\delta^{15}\text{N}$  is the result of less pronounced climatic  
452 gradients across Europe during this time period, as is evidenced in both proxy-based data and  
453 model simulations (75,76). For the Younger Dryas, the expression of the rapid cooling event in  
454 European proxy archives is inconsistent (77,78); this, coupled with the brevity of the event (c.  
455 1200 years), potential lag in environmental response, and uncertainty in assigning faunal samples

456 to such a narrow age bracket may go some way to explaining difficulties in understanding the  
457 resultant isoscape model.

458         Despite our finding that the inclusion of climatic covariate data did not improve isoscape  
459 model performance, our analysis nonetheless shows that palaeo-fauna  $\delta^{15}\text{N}$ , when averaged by  
460 location, is correlated with modelled temperature and precipitation, with relationships similar to  
461 those that are observed between modern plant and soil  $\delta^{15}\text{N}$ , and MAT and MAP (5–8). What is  
462 most striking about the investigated palaeo-fauna  $\delta^{15}\text{N}$ –climate correlations, is the strength of  
463 the relationship between site mean faunal  $\delta^{15}\text{N}$  and MAT (as well as temperature of the warmest  
464 quarter and precipitation of the warmest quarter) during the Last Glacial Maximum, Last Glacial  
465 Termination and Late Glacial Interstadial (fig. S4.2; S4.4 and S4.5). Such relationships are far  
466 stronger than for the other time periods considered and are also stronger than those observed  
467 for modern soil/plant  $\delta^{15}\text{N}$  – MAT relationships (6,7). Interestingly, while the relationship  
468 between foliar and soil  $\delta^{15}\text{N}$  and MAT has been shown not to hold true in modern low  
469 temperature environments ( $<-0.5^\circ\text{C}$  for foliar  $\delta^{15}\text{N}$  and  $<9.8^\circ\text{C}$  for soil  $\delta^{15}\text{N}$  (6,7), we do not  
470 observe such inflection points in our data, although it should be noted that few samples come  
471 from environments where MAT is predicted to be  $<0^\circ\text{C}$ .

472         Also notable is the stronger correlation between site mean faunal  $\delta^{15}\text{N}$  and precipitation  
473 of the warmest month, compared to the relationship with MAP (Fig S4.3 and S4.5 in S3  
474 Supporting Information). The relatively weak correlation between faunal  $\delta^{15}\text{N}$  and MAP for most  
475 time bins does not mirror those seen in the modern environment. In part, this may relate to the  
476 comparatively more complex nature of reconstructing palaeo-precipitation, and the poorer  
477 performance of precipitation models when compared to proxy data-based reconstructions, than

478 for reconstructing temperature (27). However, this result may also represent the importance of  
479 the complex interplay of temperature and precipitation in determining  $\delta^{15}\text{N}$ . Further, the  
480 seasonal cycle of plant growth and N requirements/availability may be responsible for seasonally  
481 distinct relationships between  $\delta^{15}\text{N}$  and climate.

482 Keeping in mind the caveats of our analysis, that; 1) faunal  $\delta^{15}\text{N}$  is only indirectly related  
483 to climate, being mediated also by the interplay of species-specific characteristics and inter-  
484 species interactions; that 2) the climate data we are using is modelled output, not empirical  
485 measurements; and 3) the assembled data aggregates  $\delta^{15}\text{N}$  across multiple species and  
486 potentially disparate time periods, the presented results offer an intriguing insight into the spatial  
487 and temporal variability of  $\delta^{15}\text{N}$  in the past.

## 488 **5. Conclusion**

489 The isoscape models presented here represent the first (to our knowledge) attempt to  
490 create time-sliced maps of terrestrial  $\delta^{15}\text{N}$  gradients based on archaeological and  
491 palaeontological animal isotope data. In addition to compiling and critically evaluating previously  
492 published data, our analysis includes the publication of several hundred new faunal  $\delta^{15}\text{N}$  data  
493 and radiocarbon dates. The analysis presented here serves two main purposes; to investigate  
494 changes in spatial gradients of  $\delta^{15}\text{N}$  in late Pleistocene Europe, with a view to investigating the  
495 Late Glacial Nitrogen Excursion, and to demonstrate more broadly the application of isoscape  
496 approaches to palaeo-data with implications for how baseline data is understood and used in  
497 archaeological and palaeoecological research. Our results have shown clear changes in spatial  
498 gradients of  $\delta^{15}\text{N}$  through time, that are most likely related to changes in landscape moisture



499 (particularly from increased input of meltwater from icesheets and thawing permafrost) that  
500 occurred after the Last Glacial Maximum. Our analysis found that the inclusion of climatic  
501 covariate data in the models did not significantly improve model performance, suggesting that  
502 the combination of the variables considered did not fully capture the drivers producing the  
503 observed spatial variation in the  $\delta^{15}\text{N}$  faunal data. Our results highlight the significant  
504 opportunities (and challenges) of applying isoscape approaches to faunal data. We demonstrate  
505 how data from multiple species of different ages can be combined to form data sets suitable for  
506 geostatistical interpolation. With the continued publication of faunal isotope data from  
507 archaeological and palaeontological assemblages, it is likely that in the coming years the accuracy  
508 and the temporal and spatial resolutions of such models can be much improved upon. Such  
509 models can make an important contribution to understanding baseline  $\delta^{15}\text{N}$  values for terrestrial  
510 food web analysis and in the interpretation of data from higher trophic level animals in relation  
511 to mobility, migration, and dietary research. Moreover, improved understanding of baseline  $\delta^{15}\text{N}$   
512 in late Pleistocene and early Holocene contexts provides a background reference against which  
513 subsequent human impact on the nitrogen cycle and overall landscape health, such as through  
514 farming practices and deforestation, can be assessed.

## 515 **Acknowledgments**

516 This work was made possible by the support of a great many colleagues and institutes,  
517 who facilitated access to, and permitted sampling of, numerous archaeological and  
518 palaeontological collections. We would like to thank Roger Jacobi, Chris Stringer and the Ancient  
519 Human Occupation of Britain project, Adrian Lister, Sonja Grimm, Sophy Charlton, Ian Barnes,

520 Melissa Marr, Tom Lord, Terry O'Connor, Linda Wilson, Graham Mullan and the University of  
521 Bristol Spelaeological Society Museum, Barry Chandler and Torquay Museum, Jan Freedman and  
522 Plymouth City Museum & Art Gallery, Brian Lewarne and the Devon Kart Society, the Museum  
523 of Archaeology and Anthropology, Cambridge, the Potteries Museum & Art Gallery, Stoke-on-  
524 Trent, Buxton Museum & Art Gallery, Elizabeth Walker and the National Museum Cardiff,  
525 Rebecca Miller, the University of Liege, Mietje Germonpré, Annelise Folie and the Royal Belgian  
526 Institute of Natural Sciences, Petr Neruda, Zdenka Nerudova, Martina Robličková and the  
527 Moravian Museum, Alex Pryor, Jiri Svoboda, Nick Conard, Susan Münzel, Wells & Mendips  
528 Museum, Somerset, Spyridoula Pappa, Pip Brewer and the Natural History Museum London, Lucy  
529 Astill and Creswell Crags Museum and Prehistoric Gorge, Sheffield Museums, Thomas Terberger,  
530 Piotr Wotjal, Marta Poltowicz-Bobak, Dariusz Bobak, and the Institute of Systematic and  
531 Evolution of Animals, Polish Academy of Sciences.

532

## 533 **References**

- 534 1. Drucker DG. The Isotopic Ecology of the Mammoth Steppe. *Annu Rev Earth Planet Sci.* 2022  
535 May 30;50(1):395–418. doi: 10.1146/annurev-earth-100821-081832
- 536 2. Wißing C, Rougier H, Crevecoeur I, Germonpré M, Naito YI, Semal P, et al. Isotopic evidence  
537 for dietary ecology of late Neandertals in North-Western Europe. *Quat Int.* 2016 Aug  
538 8;411:327–45. doi: 10.1016/j.quaint.2015.09.091

- 539 3. Schwartz-Narbonne R, Longstaffe FJ, Kardynal KJ, Druckenmiller P, Hobson KA, Jass CN, et al.  
540 Reframing the mammoth steppe: Insights from analysis of isotopic niches. *Quat Sci Rev.* 2019;  
541 215:1–21. doi: 10.1016/j.quascirev.2019.04.025
- 542 4. Szpak P. Complexities of nitrogen isotope biogeochemistry in plant-soil systems: implications  
543 for the study of ancient agricultural and animal management practices. *Front Plant Sci.* 2014  
544 Jun 23;5(JUN):288. doi: 10.3389/fpls.2014.00288
- 545 5. Amundson R, Austin AT, Schuur EAG, Yoo K, Matzek V, Kendall C, et al. Global patterns of the  
546 isotopic composition of soil and plant nitrogen. *Global Biogeochem Cycles.* 2003;17(1):1031.  
547 doi:10.1029/2002GB001903
- 548 6. Craine JM, Brookshire ENJ, Cramer MD, Hasselquist NJ, Koba K, Marin-Spiotta E, et al.  
549 Ecological interpretations of nitrogen isotope ratios of terrestrial plants and soils. *Plant Soil.*  
550 2015;396:1–26. doi: 10.1007/s11104-015-2542-1
- 551 7. Craine JM, Elmore AJ, Aidar MPM, Bustamante M, Dawson TE, Hobbie EA, et al. Global  
552 patterns of foliar nitrogen isotopes and their relationships with climate, mycorrhizal fungi,  
553 foliar nutrient concentrations, and nitrogen availability. *New Phytol.* 2009;183:980–92. doi:  
554 10.1111/j.1469-8137.2009.02917.x
- 555 8. Craine JM, Elmore AJ, Wang L, Augusto L, Baisden WT, Brookshire ENJ, et al. Convergence of  
556 soil nitrogen isotopes across global climate gradients. *Sci Rep.* 2015 Feb 6;5. doi:  
557 10.1038/srep08280

- 558 9. Männel TT, Auerswald K, Schnyder H. Altitudinal gradients of grassland carbon and nitrogen  
559 isotope composition are recorded in the hair of grazers. *Glob Ecol Biogeogr.* 2007  
560 Sep;16(5):583–92. doi: 10.1111/j.1466-8238.2007.00322.x
- 561 10. Liu X, Wang G, Li J, Wang Q. Nitrogen isotope composition characteristics of modern plants  
562 and their variations along an altitudinal gradient in Dongling Mountain in Beijing.  
563 *Sci China Ser D Earth Sci.* 2010 Jan 3;53(1):128–40. doi: 10.1007/s11430-009-0175-z
- 564 11. Smiley TM, Cotton JM, Badgley C, Cerling TE. Small-mammal isotope ecology tracks climate  
565 and vegetation gradients across western North America. *Oikos.* 2016 Aug 9;125(8):1100–9.  
566 doi: 10.1111/oik.02722
- 567 12. Hartman G. Are elevated  $\delta^{15}\text{N}$  values in herbivores in hot and arid environments caused by  
568 diet or animal physiology? *Funct Ecol.* 2011 Feb 28;25(1):122–31. doi: 10.1111/j.1365-  
569 2435.2010.01782.x
- 570 13. Stevens RE, Germonpré M, Petrie CA, O’Connell TC. Palaeoenvironmental and chronological  
571 investigations of the Magdalenian sites of Goyet Cave and Trou de Chaleux (Belgium), via  
572 stable isotope and radiocarbon analyses of horse skeletal remains. *J Archaeol Sci.*  
573 2009;36(3):653–62. doi: 10.1016/j.jas.2008.10.008
- 574 14. Stevens RE, O’Connell TC, Hedges REM, Street M. Radiocarbon and stable isotope  
575 investigations at the Central Rhineland sites of Gönnersdorf and Andernach-Martinsberg,  
576 Germany. *J Hum Evol.* 2009;57(2):131–48. DOI: 10.1016/j.jhevol.2009.01.011

- 577 15. Richards MP, Hedges REM. Variations in bone collagen  $\delta^{13}\text{C}$  and  $\delta^{15}\text{N}$  values of fauna from  
578 Northwest Europe over the last 40 000 years. *Palaeogeogr Palaeoclimatol Palaeoecol.* 2003  
579 Apr 15;193(2):261–7. doi: 10.1016/S0031-0182(03)00229-3
- 580 16. Drucker DG, Bocherens H, Billiou D. Evidence for shifting environmental conditions in  
581 Southwestern France from 33 000 to 15 000 years ago derived from carbon-13 and nitrogen-  
582 15 natural abundances in collagen of large herbivores. *Earth Planet Sci Lett.* 2003 Nov  
583 15;216(1–2):163–73. doi: 10.1016/S0012-821X(03)00514-4
- 584
- 585 17. Stevens RE, Jacobi R, Street M, Germonpré M, Conard NJ, Münzel SC, et al. Nitrogen isotope  
586 analyses of reindeer (*Rangifer tarandus*), 45,000 BP to 9,000 BP: Palaeoenvironmental  
587 reconstructions. *Palaeogeogr Palaeoclimatol Palaeoecol.* 2008 May 27;262(1–2):32–45. doi:  
588 10.1016/j.palaeo.2008.01.019
- 589 18. Fox-Dobbs K, Leonard JA, Koch PL. Pleistocene megafauna from eastern Beringia:  
590 Paleocological and paleoenvironmental interpretations of stable carbon and nitrogen  
591 isotope and radiocarbon records. *Palaeogeogr Palaeoclimatol Palaeoecol.* 2008 Apr  
592 24;261(1–2):30–46. doi: 10.1016/j.palaeo.2007.12.011
- 593 19. Bocherens H, Drucker DG, Madelaine S. Evidence for a  $^{15}\text{N}$  positive excursion in terrestrial  
594 foodwebs at the Middle to Upper Palaeolithic transition in south-western France:  
595 Implications for early modern human palaeodiet and palaeoenvironment. *J Hum Evol.*  
596 2014;69(1):31–43. doi: 10.1016/j.jhevol.2013.12.015

- 597 20. Reade H, Grimm SB, Tripp JA, Neruda P, Nerudová Z, Roblíčková M, et al. Magdalenian and  
598 Epimagdalenian chronology and palaeoenvironments at Kůlna Cave, Moravia, Czech  
599 Republic. *Archaeol Anthropol Sci* . 2021 Jan 17;13(1):4. doi: 10.1007/s12520-020-01254-4
- 600 21. Reade H, Tripp JA, Charlton S, Grimm SB, Leesch D, Müller W, et al. Deglacial landscapes and  
601 the Late Upper Palaeolithic of Switzerland. *Quat Sci Rev*. 2020 Jul 1;239. doi:  
602 10.1016/j.quascirev.2020.106372
- 603 22. Mann DH, Groves P, Kunz ML, Reanier RE, Gaglioti B v. Ice-age megafauna in Arctic Alaska:  
604 Extinction, invasion, survival. *Quat Sci Rev*. 2013;70:91–108. doi:  
605 10.1016/j.quascirev.2013.03.015
- 606 23. Stevens RE, Hedges REM. Carbon and nitrogen stable isotope analysis of northwest European  
607 horse bone and tooth collagen, 40,000 BP-present: Palaeoclimatic interpretations. *Quat Sci*  
608 *Rev*. 2004. p. 977–91. doi: 10.1016/j.quascirev.2003.06.024
- 609 24. Hedges REM, Stevens RE, Richards MP. Bone as a stable isotope archive for local climatic  
610 information. *Quat Sci Rev*. 2004. p. 959–65. doi: 10.1016/j.quascirev.2003.06.022
- 611 25. Rabanus-Wallace MT, Wooller MJ, Zazula GD, Shute E, Jahren AH, Kosintsev P, et al.  
612 Megafaunal isotopes reveal role of increased moisture on rangeland during late Pleistocene  
613 extinctions. *Nat Ecol Evol*. 2017 Apr 18;1(5). doi: 10.1038/s41559-017-0125
- 614 26. Drucker DG, Bridault A, Cupillard C, Hujic A, Bocherens H. Evolution of habitat and  
615 environment of red deer (*Cervus elaphus*) during the Late-glacial and early Holocene in  
616 eastern France (French Jura and the western Alps) using multi-isotope analysis ( $\delta^{13}C$ ,  $\delta^{15}N$ ,

- 617  $\delta^{18}\text{O}$ ,  $\delta^{13}\text{C}$ ) of archaeological remains. *Quat Int.* 2011 Dec 6;245(2):268–78. doi:  
618 10.1016/j.quaint.2011.07.019
- 619 27. Beyer RM, Krapp M, Manica A. High-resolution terrestrial climate, bioclimate and vegetation  
620 for the last 120,000 years. *Sci Data.* 2020 Dec 1;7(1). doi: 10.1038/s41597-020-0552-1
- 621 28. Thomas ER, Wolff EW, Mulvaney R, Steffensen JP, Johnsen SJ, Arrowsmith C, et al. The 8.2ka  
622 event from Greenland ice cores. *Quat Sci Rev.* 2007 Jan;26(1–2):70–81. doi:  
623 10.1016/j.quascirev.2006.07.017
- 624 29. Guiry E, Beglane F, Szpak P, Schulting R, McCormick F, Richards MP. Anthropogenic changes  
625 to the Holocene nitrogen cycle in Ireland. *Sci Adv.* 2018 Jun;4(6). doi: 10.1126/sciadv.aas9383
- 626 30. Gkiasta M, Russell T, Shennan S, Steele J. Neolithic transition in Europe: the radiocarbon  
627 record revisited. *Antiquity.* 2003 Mar 2;77(295):45–62. doi:10.1017/S0003598X00061330
- 628 31. Reimer PJ, Austin WEN, Bard E, Bayliss A, Blackwell PG, Bronk Ramsey C, et al. The IntCal20  
629 Northern Hemisphere Radiocarbon Age Calibration Curve (0–55 cal kBP). *Radiocarbon.* 2020  
630 Aug 12;62(4):725–57. doi:10.1017/RDC.2020.41
- 631 32. Bocherens H. Isotopic biogeochemistry and the paleoecology of the mammoth steppe fauna.  
632 In: Reumer WF, Braber F, Mol D, de Vos J, editors. *Advances in Mammoth Research,*  
633 *Proceedings of the Second International Mammoth Conference, May 16–20 1999.*  
634 Rotterdam: Deinsea; 2003. p. 46–53.
- 635 33. Szpak P, Gröcke DR, Debruyne R, MacPhee RDE, Guthrie RD, Froese D, et al. Regional  
636 differences in bone collagen  $\delta^{13}\text{C}$  and  $\delta^{15}\text{N}$  of Pleistocene mammoths: Implications for

- 637 paleoecology of the mammoth steppe. *Palaeogeogr Palaeoclimatol Palaeoecol*. 2010 Feb  
638 1;286(1–2):88–96. doi: 10.1016/j.palaeo.2009.12.009
- 639 34. Schwartz-Narbonne R, Longstaffe FJ, Metcalfe JZ, Zazula G. Solving the woolly mammoth  
640 conundrum: Amino acid 15N-enrichment suggests a distinct forage or habitat. *Sci Rep*. 2015  
641 Jun 9;5. doi: 10.1038/srep09791
- 642 35. Ramos-Lara N, Koprowski JL, Kryštufek B, Hoffmann IE. *Spermophilus citellus* (Rodentia:  
643 Sciuridae). *Mamm Species*. 2014 Dec 12;913:71–87. doi: 10.1644/913.1
- 644 36. Hewson R, Hinge MDC, Hewson And R. Characteristics of the Home Range of Mountain Hares  
645 *Lepus timidus*. *J Appl Ecol*. 1990; 651-666. doi: [10.2307/2404309](https://doi.org/10.2307/2404309)
- 646 37. Devillard S, Aubineau J, Berger F, Léonard Y, Roobrouck A, Marchandeu S. Home range of  
647 the European rabbit (*Oryctolagus cuniculus*) in three contrasting French populations. *Mamm*  
648 *Biol*. 2008 Mar;73(2):128–37. Doi: 10.1016/j.mambio.2007.01.003
- 649 38. Brown WAB, Chapman NG. Age assessment of fallow deer ( *Dama dama* ): from a scoring  
650 scheme based on radiographs of developing permanent molariform teeth. *J Zool*. 1991 Jul  
651 24;224(3):367–79. doi: 10.1111/j.1469-7998.1991.tb06031.x
- 652 39. Brown WAB, Chapman NG. Age assessment of red deer ( *Cervus elaphus* ): from a scoring  
653 scheme based on radiographs of developing permanent molariform teeth. *J Zool*. 1991 Sep  
654 23;225(1):85–97. doi: 10.1111/j.1469-7998.1991.tb03803.x
- 655 40. Stevens RE, O’Connell TC. Red deer bone and antler collagen are not isotopically equivalent  
656 in carbon and nitrogen. *Rapid Commun Mass Spectrom*. 2016 Sep 15;30(17):1969–84. doi:  
657 10.1002/rcm.7670



- 658 41. Goss RJ. Deer Antlers. Regeneration, function and evolution. New York: Academic Press;  
659 1983.
- 660 42. Rasmussen SO, Bigler M, Blockley SP, Blunier T, Buchardt SL, Clausen HB, et al. A stratigraphic  
661 framework for abrupt climatic changes during the Last Glacial period based on three  
662 synchronized Greenland ice-core records: Refining and extending the INTIMATE event  
663 stratigraphy. *Quat Sci Rev.* 2014 Dec 15;106:14–28. doi: 10.1016/j.quascirev.2014.09.007
- 664 43. Hughes PD, Gibbard PL. A stratigraphical basis for the Last Glacial Maximum (LGM). *Quat Int.*  
665 2015 Oct 5;383:174–85. doi: 10.1016/j.quaint.2014.06.006
- 666 44. Bronk Ramsey C. Bayesian Analysis of Radiocarbon Dates. *Radiocarbon.* 2009 Jul  
667 18;51(1):337–60. doi: 10.1017/S0033822200033865
- 668 45. Danielson JJ, Gesch DB. Global multi-resolution terrain elevation data 2010 (GMTED2010).  
669 2011. doi: 10.3133/ofr20111073
- 670 46. R Core Team. R: A language and environment for statistical computing. . Vienna, Austria: R  
671 Foundation for Statistical Computing; 2017. <https://www.R-project.org/>
- 672 47. Courtiol A, Rousset F. Modelling isoscapes using mixed models. bioRxiv 207662 [Preprint].  
673 2017 [cited 01 April 2022]. Available from:  
674 <https://www.biorxiv.org/content/10.1101/207662v1> doi: 10.1101/207662
- 675 48. Courtiol A, Rousset F, Rohwäder MS, Soto DX, Lehnert LS, Voigt CC, et al. Isoscape  
676 Computation and Inference of Spatial Origins With Mixed Models Using the R package IsoriX.  
677 In: Hobson KA, Wassenaar LI, editors. *Tracking Animal Migration with Stable Isotopes.*  
678 Academic Press 2019. p. 207–36. doi: 10.1016/B978-0-12-814723-8.00009-X.

- 679 49. Rousset F, Ferdy JB. Testing environmental and genetic effects in the presence of spatial  
680 autocorrelation. *Ecography*. 2014 Aug;37(8):781–90. doi: 10.1111/ecog.00566
- 681 50. Bowen GJ, West JB. Isoscapes for Terrestrial Migration Research. In: *Tracking Animal*  
682 *Migration with Stable Isotopes*. In: Hobson KA, Wassenaar LI, editors. *Tracking Animal*  
683 *Migration with Stable Isotopes*. Academic Press 2019 pp. 53–84. doi: 10.1016/B978-0-12-  
684 814723-8.00003-9
- 685 51. Gil AF, Villalba R, Franchetti FR, Otaola C, Abbona CC, Peralta EA, et al. Between Foragers and  
686 Farmers: Climate Change and Human Strategies in Northwestern Patagonia. *Quaternary*.  
687 2020 Jun 17;3(2):17. doi: 10.3390/quat3020017
- 688 52. Barrientos G, Catella L, Morales NS. A journey into the landscape of past feeding habits:  
689 Mapping geographic variations in the isotope ( $\delta^{15}\text{N}$ ) -inferred trophic position of prehistoric  
690 human populations. *Quat Int*. 2020 May 20;548:13–26. doi: 10.1016/j.quaint.2020.01.023
- 691 53. Pellegrini M, Pouncett J, Jay M, Pearson MP, Richards MP. Tooth enamel oxygen “isoscapes”  
692 show a high degree of human mobility in prehistoric Britain. *Sci Rep*. 2016 Dec 7;6(1):34986.  
693 doi: 10.1038/srep34986
- 694 54. Bataille CP, Jaouen K, Milano S, Trost M, Steinbrenner S, Crubézy É, et al. Triple sulfur-oxygen-  
695 strontium isotopes probabilistic geographic assignment of archaeological remains using a  
696 novel sulfur isoscape of western Europe. Bondioli L, editor. *PLOS ONE*. 2021 May  
697 5;16(5):e0250383. doi: 10.1371/journal.pone.0250383
- 698 55. Scaffidi BK, Knudson KJ. An archaeological strontium isoscape for the prehistoric Andes:  
699 Understanding population mobility through a geostatistical meta-analysis of archaeological

- 700 87Sr/86Sr values from humans, animals, and artifacts. *J Archaeol Sci.* 2020 May  
701 1;117:105121. doi: 10.1016/j.jas.2020.105121
- 702 56. Sena-Souza JP, Houlton BZ, Martinelli LA, Bielefeld Nardoto G. Reconstructing  
703 continental-scale variation in soil  $\delta^{15}\text{N}$ : a machine learning approach in South America.  
704 *Ecosphere.* 2020 Aug 31;11(8). doi: 10.1002/ecs2.3223
- 705 57. Rascher KG, Hellmann C, Máguas C, Werner C. Community scale  $^{15}\text{N}$  isoscapes: Tracing the  
706 spatial impact of an exotic  $\text{N}_2$ -fixing invader. *Ecol Lett.* 2012 May;15(5):484–91. doi:  
707 10.1111/j.1461-0248.2012.01761.x
- 708 58. Fox-Dobbs K, Doak DF, Brody AK, Palmer TM. Termites create spatial structure and govern  
709 ecosystem function by affecting  $\text{N}_2$  fixation in an East African savanna. *Ecology.* 2010  
710 May;91(5):1296–307. doi: 10.1890/09-0653.1
- 711 59. Pardo LH, Nadelhoffer KJ. Using Nitrogen Isotope Ratios to Assess Terrestrial Ecosystems at  
712 Regional and Global Scales. In: West, JB, Bowen GJ, Dawson TE, Tu KP. *Isoscapes:  
713 Understanding Movement, Pattern, and Process on Earth Through Isotope Mapping.*  
714 Dordrecht: Springer Netherlands; 2010. p. 221–49. doi: 10.1007/978-90-481-3354-3\_11
- 715 60. Drucker DG, Stevens RE, Germonpré M, Sablin M v., Péan S, Bocherens H. Collagen stable  
716 isotopes provide insights into the end of the mammoth steppe in the central East European  
717 plains during the Epigravettian. *Quat Res.* 2018 Nov 11;90(3):457–69.  
718 doi:10.1017/qua.2018.40
- 719 61. Drucker DG, Rosendahl W, van Neer W, Weber MJ, Görner I, Bocherens H. Environment and  
720 subsistence in north-western Europe during the Younger Dryas: An isotopic study of the

- 721 human of Rhünda (Germany). *J Archaeol Sci: Reports*. 2016 Apr 1;6:690–9. doi:  
722 10.1016/j.jasrep.2015.08.002
- 723 62. Hofman-Kamińska E, Bocherens H, Drucker DG, Fyfe RM, Gumiński W, Makowiecki D, et al.  
724 Adapt or die—Response of large herbivores to environmental changes in Europe during the  
725 Holocene. *Glob Chang Biol*. 2019 Sep 12;25(9):2915–30. doi: 10.1111/gcb.14733
- 726 63. Rivals F, Mihalbachler MC, Solounias N, Mol D, Semprebon GM, de Vos J, et al. Palaeoecology  
727 of the Mammoth Steppe fauna from the late Pleistocene of the North Sea and Alaska:  
728 Separating species preferences from geographic influence in paleoecological dental wear  
729 analysis. *Palaeogeogr Palaeoclimatol Palaeoecol*. 2010 Feb 1;286(1–2):42–54. doi:  
730 10.1016/j.palaeo.2009.12.002
- 731 64. Tahmasebi F, Longstaffe FJ, Zazula G, Bennett B. Nitrogen and carbon isotopic dynamics of  
732 subarctic soils and plants in southern Yukon Territory and its implications for paleoecological  
733 and paleodietary studies. Mohan J, editor. *PLOS ONE*. 2017 Aug 16;12(8):e0183016. doi:  
734 10.1371/journal.pone.0183016
- 735 65. Metcalfe JZ. C<sub>3</sub> plant isotopic variability in a boreal mixed woodland: implications for bison  
736 and other herbivores. *PeerJ*. 2021 Sep 23;9:e12167. doi: 10.7717/peerj.12167
- 737 66. Tahmasebi F, Longstaffe FJ, Zazula G. Nitrogen isotopes suggest a change in nitrogen  
738 dynamics between the Late Pleistocene and modern time in Yukon, Canada. *PLOS ONE*. 2018  
739 Feb 15;13(2):e0192713. doi: 10.1371/journal.pone.0192713

- 740 67. Zhou Y, Cheng X, Fan J, Harris W. Patterns and controls of foliar nitrogen isotope composition  
741 on the Qinghai-Tibet Plateau, China. *Plant Soil*. 2016 Sep 7;406(1–2):265–76. doi:  
742 10.1007/s11104-016-2882-5
- 743 68. Rivals F, Drucker DG, Weber MJ, Audouze F, Enloe JG. Dietary traits and habitats of the  
744 reindeer (*Rangifer tarandus*) during the Late Glacial of Northern Europe. *Archaeol Anthropol*  
745 *Sci* . 2020 May 6;12(5):98. doi: 10.1007/s12520-020-01052-y
- 746 69. Lindgren A, Hugelius G, Kuhry P, Christensen TR, Vandenberghe J. GIS-based Maps and Area  
747 Estimates of Northern Hemisphere Permafrost Extent during the Last Glacial Maximum.  
748 *Permafr Periglac Process*. 2016 Jan;27(1):6–16. doi: 10.1002/ppp.1851
- 749 70. Atkin OK. Reassessing the nitrogen relations of Arctic plants: a mini-review.  
750 *Plant Cell Environ*. 1996 Jun;19(6):695–704. Doi: 10.1111/j.1365-3040.1996.tb00404.x
- 751 71. Liu XY, Koba K, Koyama LA, Hobbie SE, Weiss MS, Inagaki Y, et al. Nitrate is an important  
752 nitrogen source for Arctic tundra plants. *Proc Natl Acad Sci U S A*. 2018 Mar 27;115(13):3398–  
753 403. doi: 10.1073/pnas.1715382115
- 754 72. Denk TRA, Mohn J, Decock C, Lewicka-Szczebak D, Harris E, Butterbach-Bahl K, et al. The  
755 nitrogen cycle: A review of isotope effects and isotope modeling approaches. *Soil Biol*  
756 *Biochem*. 2017 Feb 1;105:121–37. doi: 10.1016/j.soilbio.2016.11.015
- 757 73. Jin XY, Jin HJ, Iwahana G, Marchenko SS, Luo DL, Li XY, et al. Impacts of climate-induced  
758 permafrost degradation on vegetation: A review. *Adv. Clim. Chang. Res*. 2021;20:29–47. doi:  
759 10.1016/j.accr.2020.07.002.

- 760 74. Gebauer RLE, Tenhunen JD, Reynolds JF. Soil aeration in relation to soil physical properties,  
761 nitrogen availability, and root characteristics within an arctic watershed. *Plant Soil*. 1996  
762 Jan;178(1):37–48. doi: 10.1007/BF00011161
- 763 75. Renssen H, Isarin RFB, Vandenberghe & J. Thermal gradients in Europe during the last glacial-  
764 interglacial transition. *Neth J Geosci*. 2002;81(1):113–22. doi: 10.1017/S0016774600020618
- 765 76. Heiri O, Brooks SJ, Renssen H, Bedford A, Hazekamp M, Ilyashuk B, et al. Validation of climate  
766 model-inferred regional temperature change for late-glacial Europe. *Nat Commun*. 2014 Dec  
767 11;5(1):4914. doi: 10.1038/ncomms5914
- 768 77. Abrook AM, Matthews IP, Candy I, Palmer AP, Francis CP, Turner L, et al. Complexity and  
769 asynchrony of climatic drivers and environmental responses during the Last Glacial-  
770 Interglacial Transition (LGIT) in north-west Europe. *Quat Sci Rev*. 2020 Dec 15;250: 106634.  
771 doi: 10.1016/j.quascirev.2020.106634
- 772 78. Muschitiello F, Wohlfarth B. Time-transgressive environmental shifts across Northern Europe  
773 at the onset of the Younger Dryas. *Quat Sci Rev*. 2015 Feb 1;109:49–56. doi:  
774 10.1016/j.quascirev.2014.11.015
- 775 79. Zickel M, Becker D, Verheul J, Yener Y, Willmes C. Paleocoastlines GIS dataset. CRC806-  
776 Database. 2016. Available from: [https://crc806db.uni-](https://crc806db.uni-koeln.de/dataset/show/paleocoastlines-gis-dataset1462293239/)  
777 [koeln.de/dataset/show/paleocoastlines-gis-dataset1462293239/](https://crc806db.uni-koeln.de/dataset/show/paleocoastlines-gis-dataset1462293239/) doi: 10.5880/SFB806.20
- 778 80. Hughes ALC, Gyllencreutz R, Lohne OS, Mangerud J, Svendsen JI DATED-1: compilation of  
779 dates and time-slice reconstruction of the build-up and retreat of the last Eurasian (British-  
780 Irish, Scandinavian, Svalbard-Barents-Kara Seas) Ice Sheets 40-10 ka. 2015. Department of

781 Earth Science, University of Bergen and Bjerknes Centre for Climate Research, PANGAEA.

782 Available from: <https://doi.org/10.1594/PANGAEA.848117>

783 81. Wessel P, Smith WHF. A global, self-consistent, hierarchical, high-resolution shoreline  
784 database. J. Geophys. Res. 1996;101(B4):8741-8743. doi:10.1029/96JB00104.

785

## 786 **Supporting Information**

787 **S1 Dataset**

788 **S2 Script**

789 **S3 Supporting Information**

790 **S4 Base maps for figures**

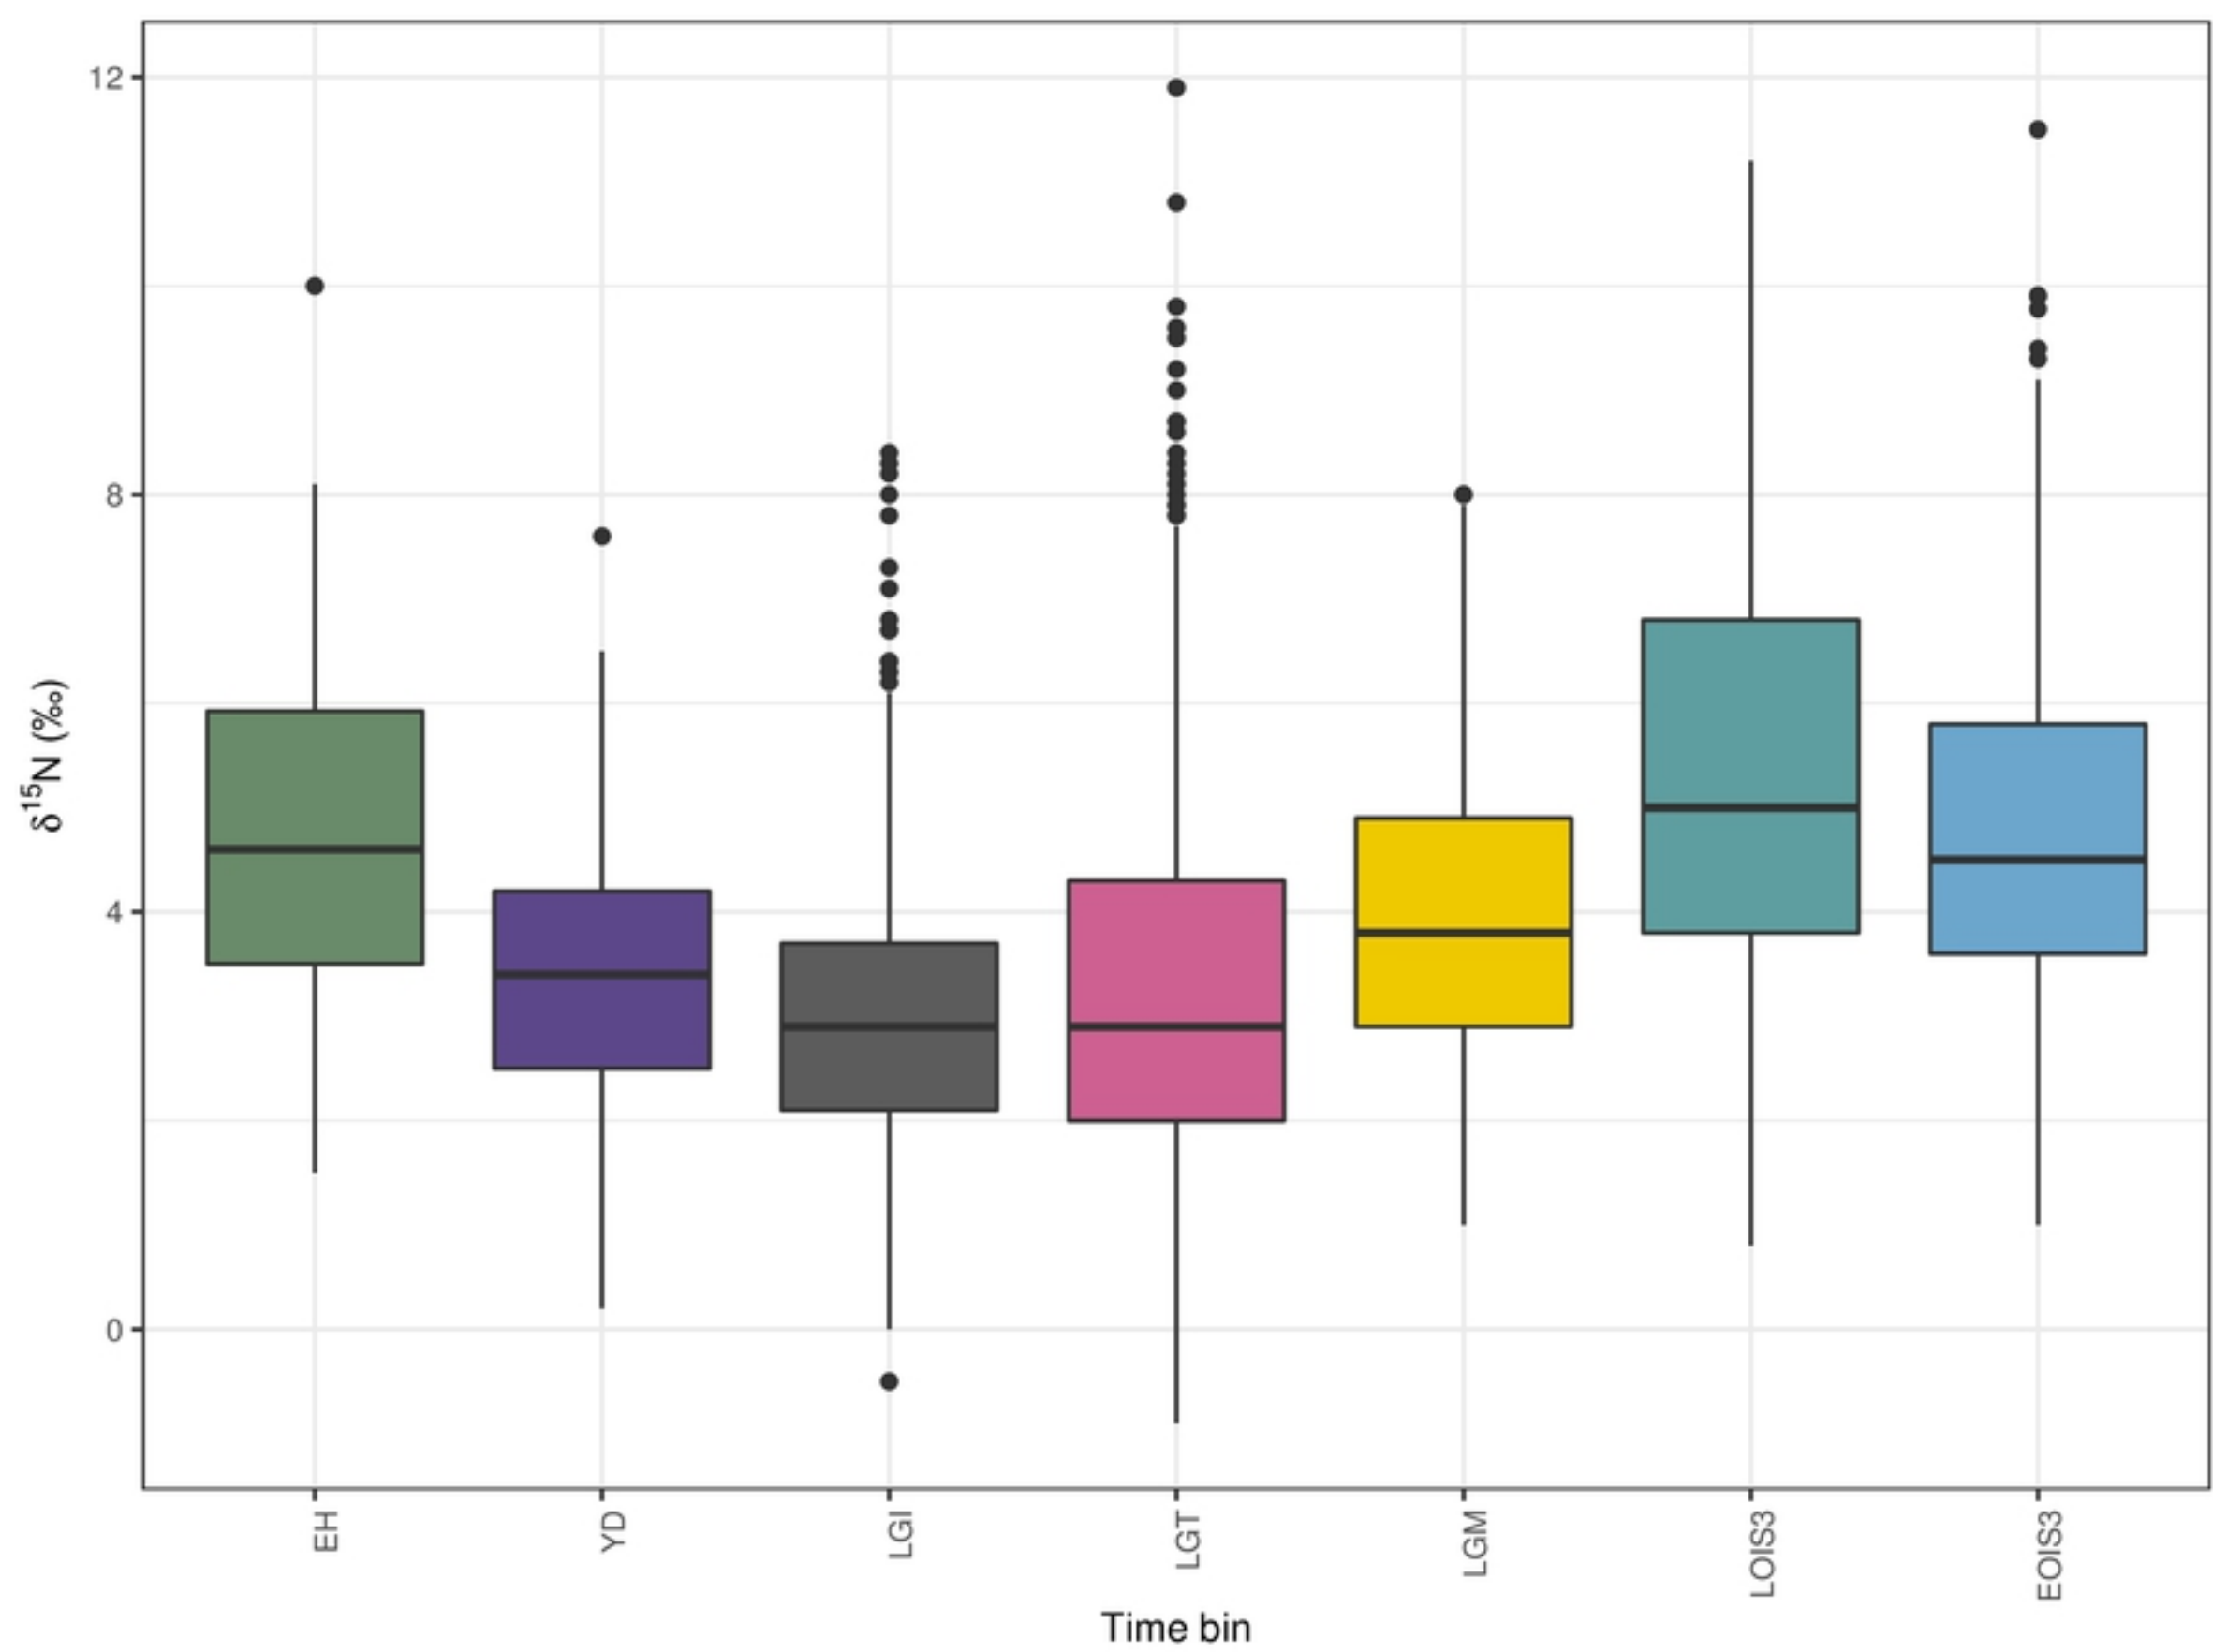

Figure 1



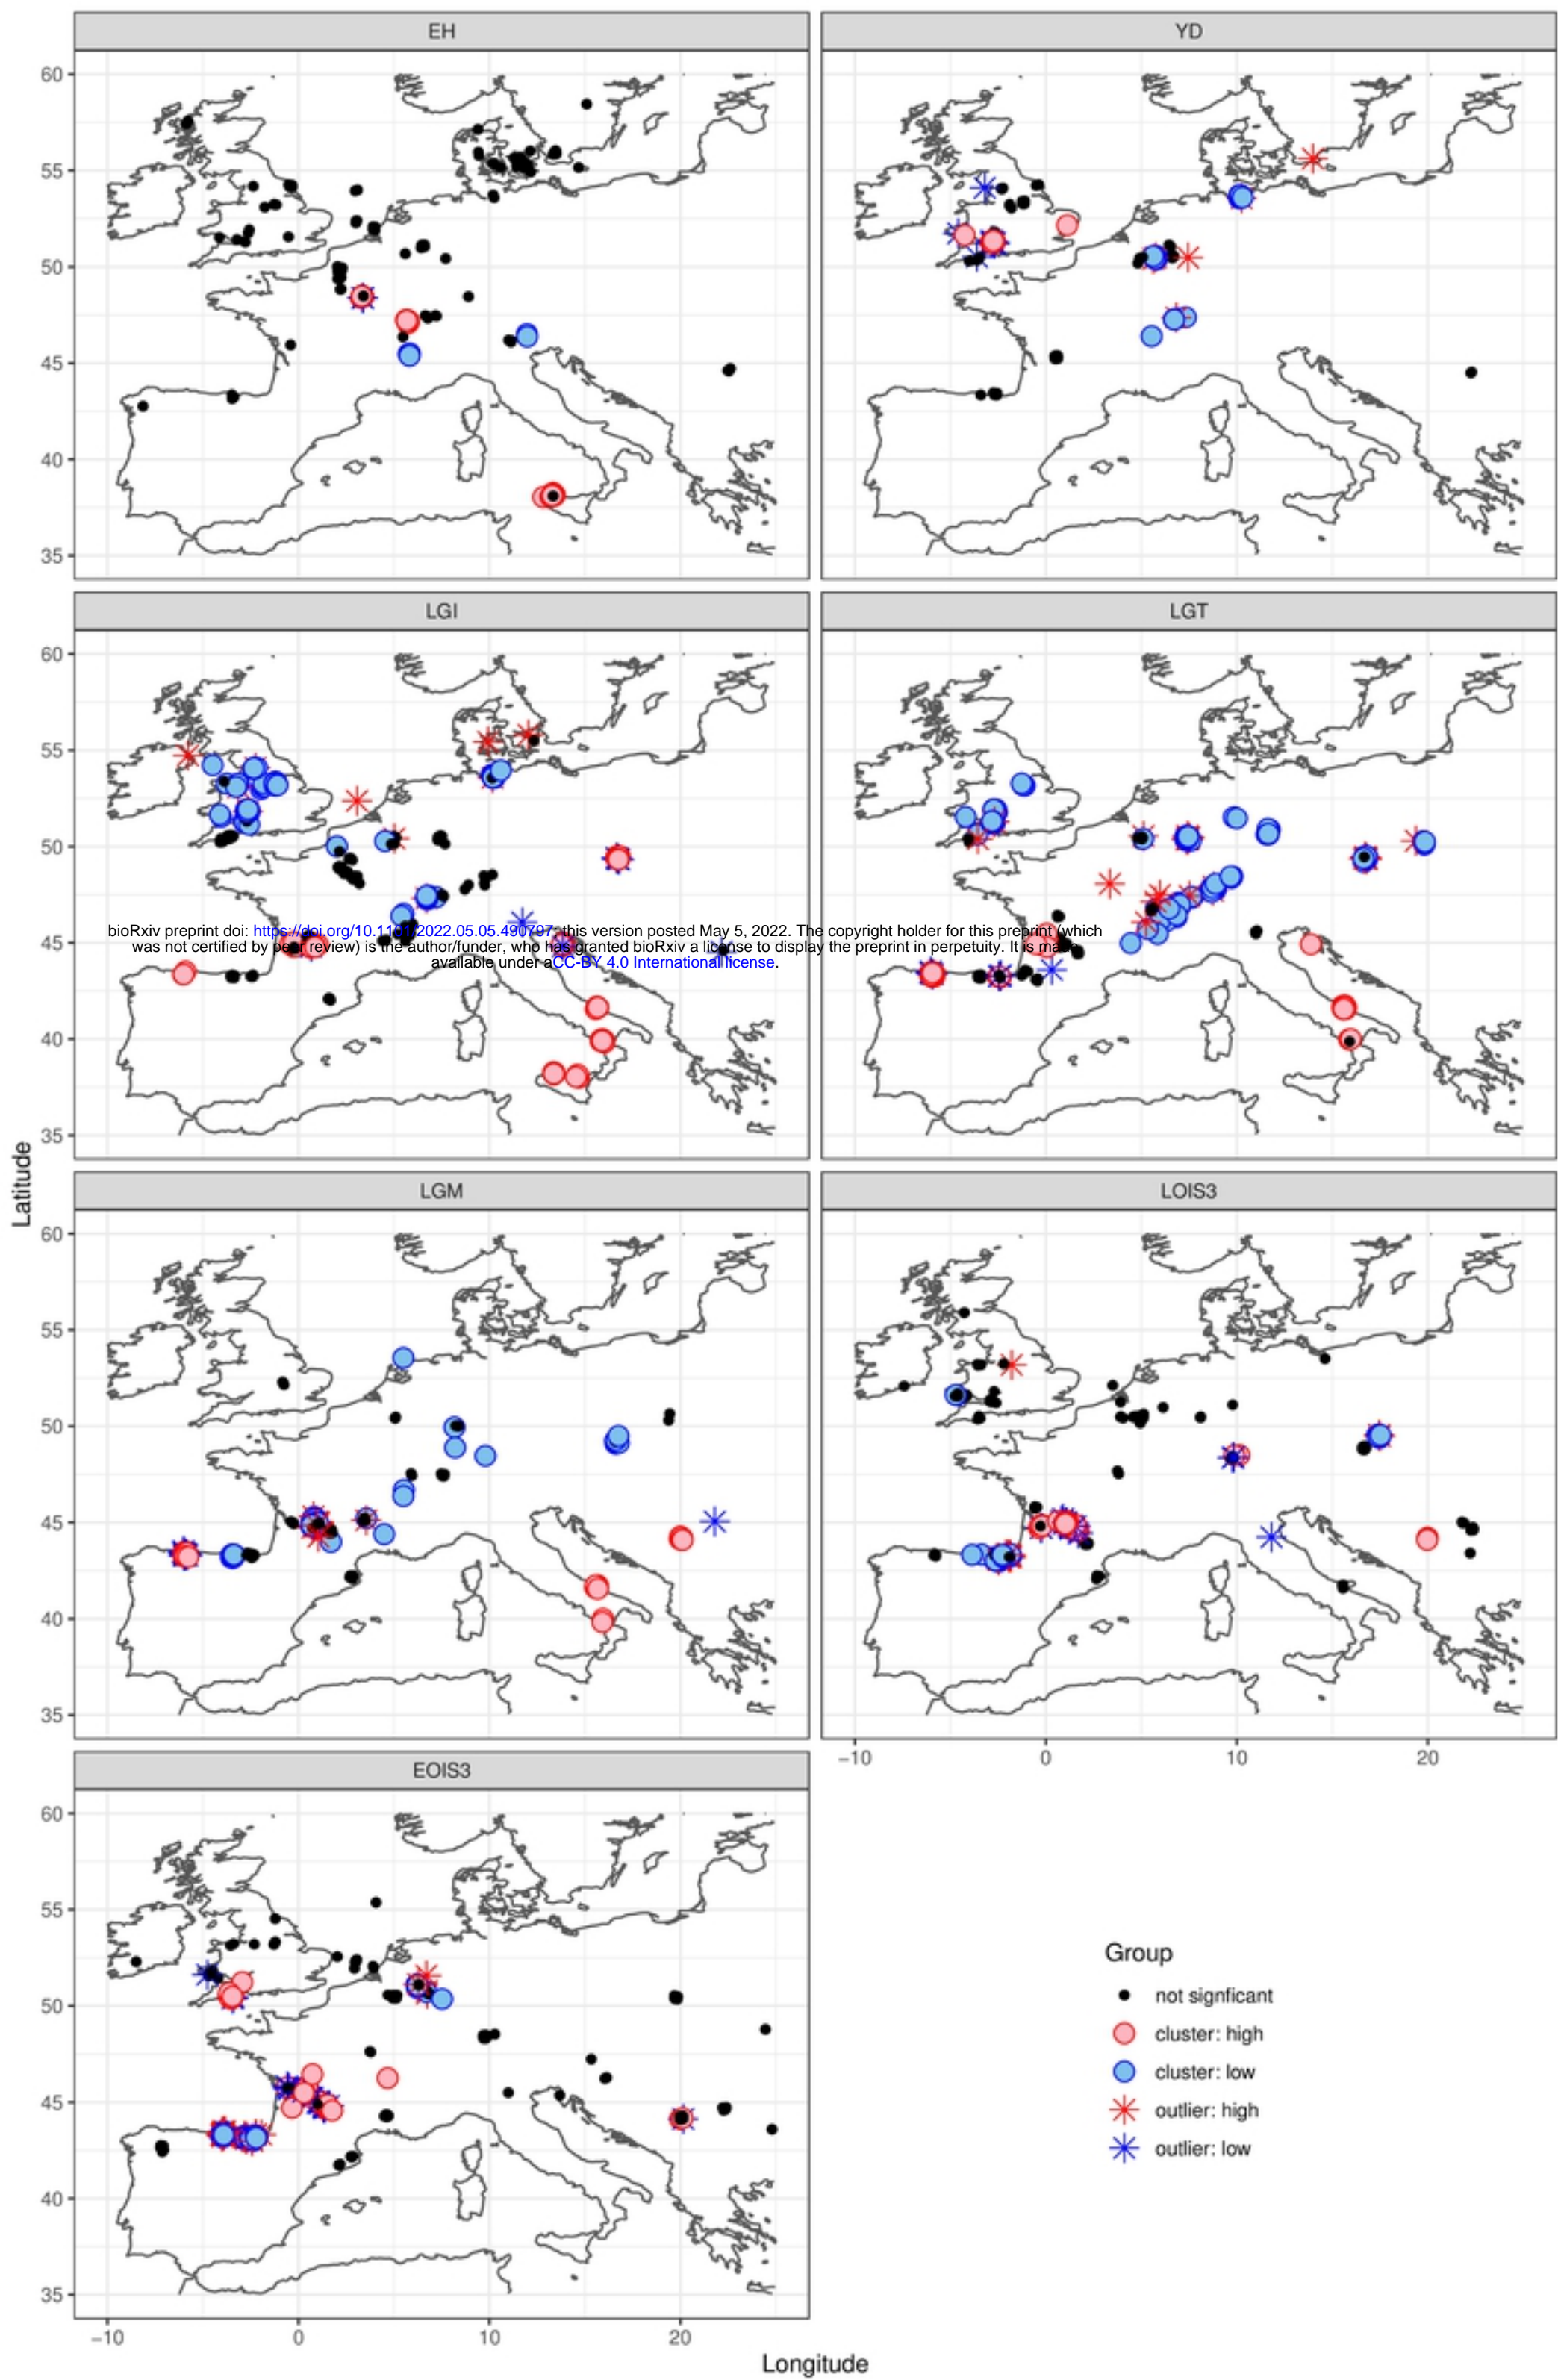

Figure2



Early Holocene

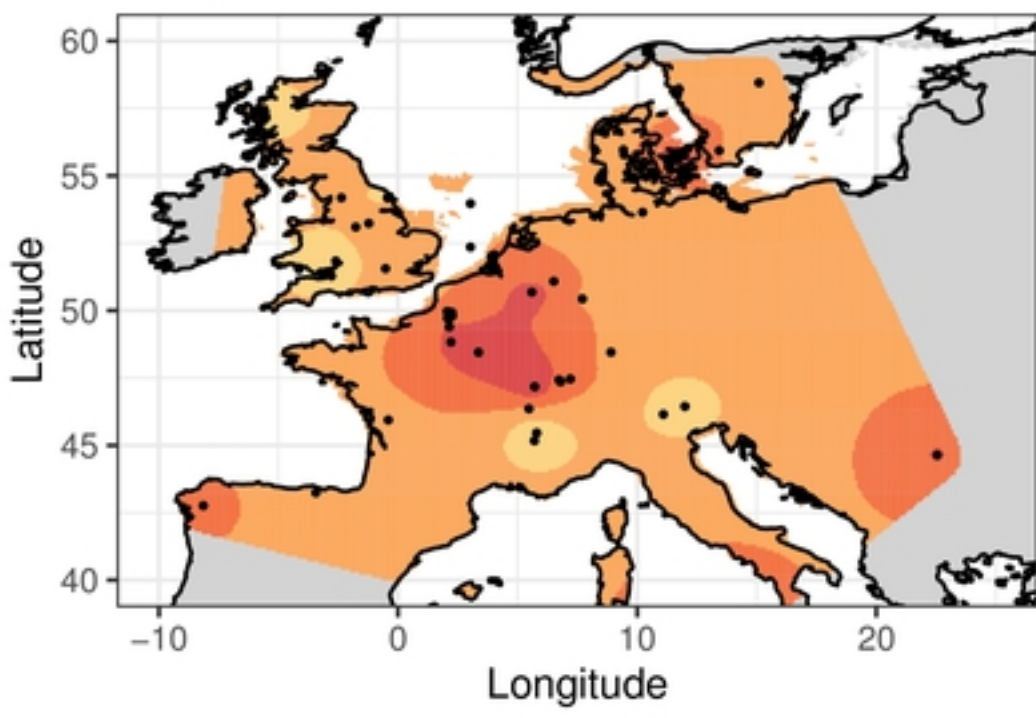

Younger Dryas

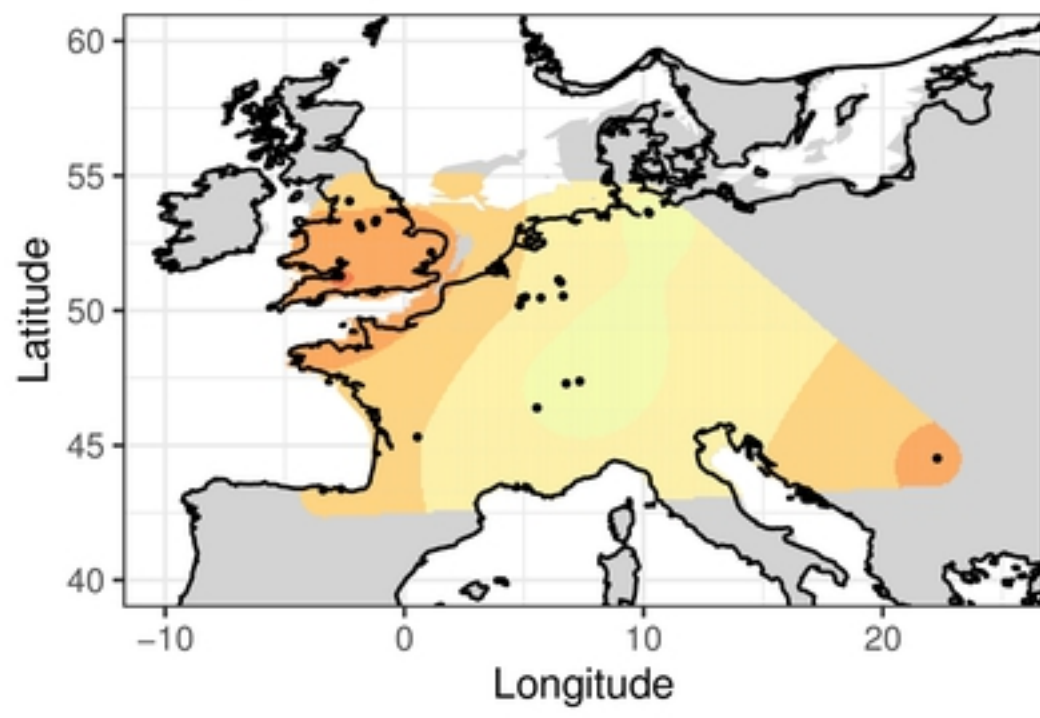

Late Glacial Interstadial

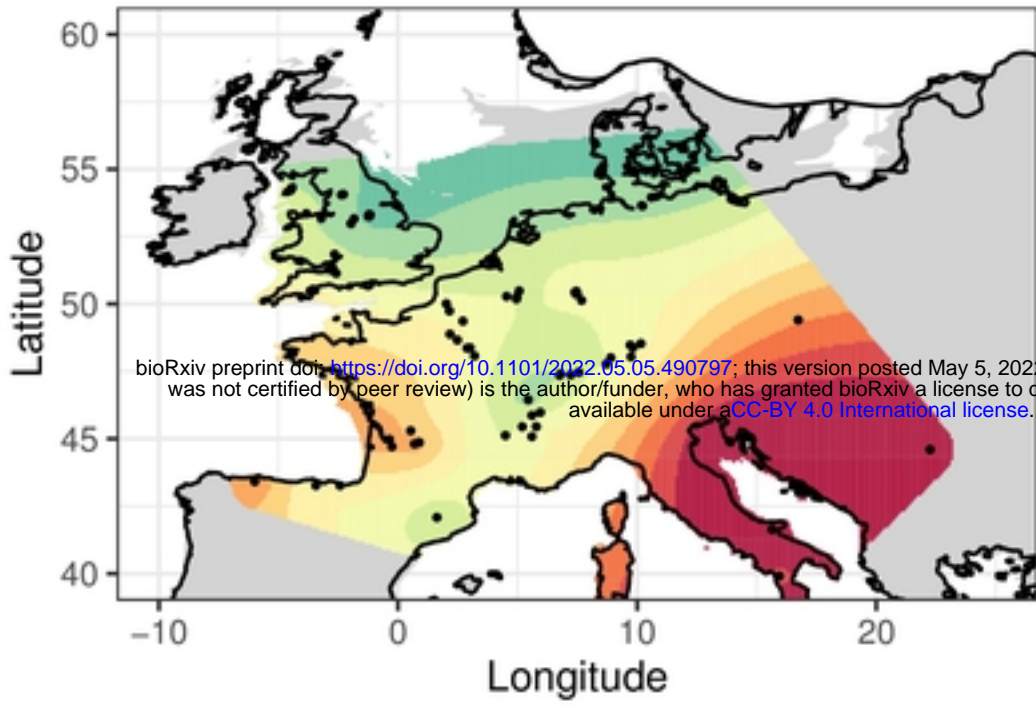

Last Glacial Termination

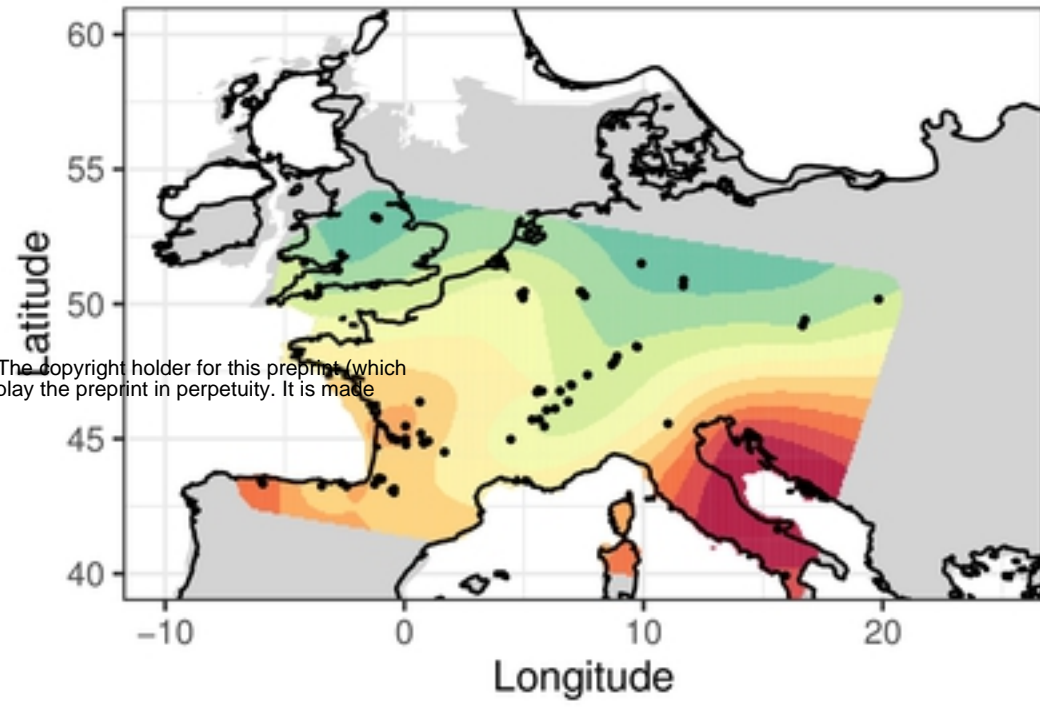

Last Glacial Maximum

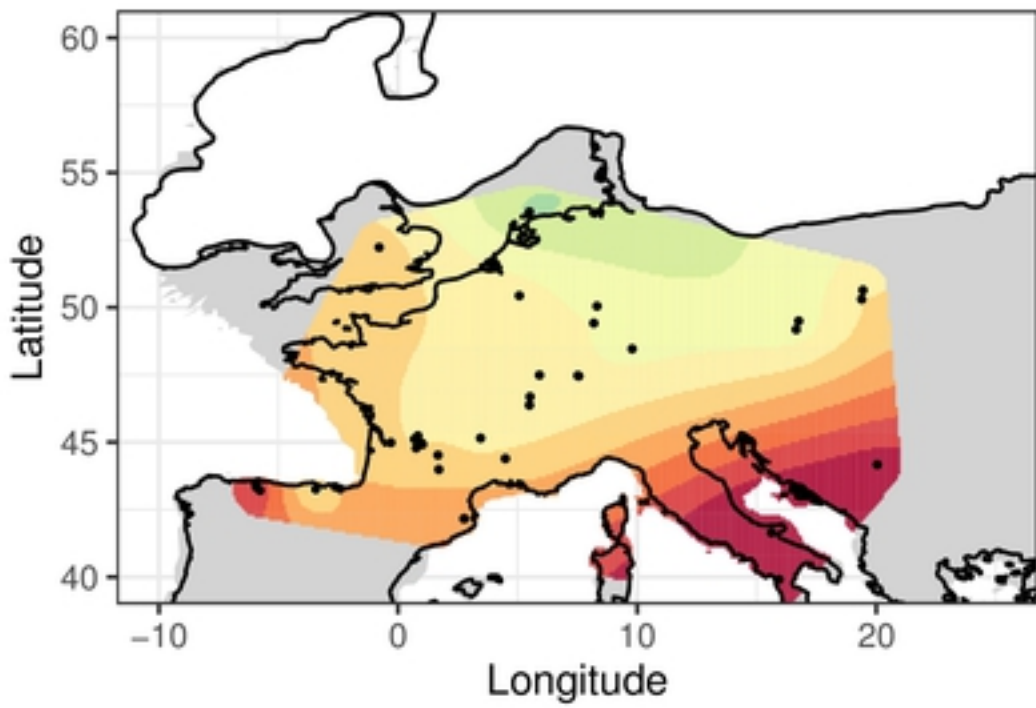

Late OIS 3

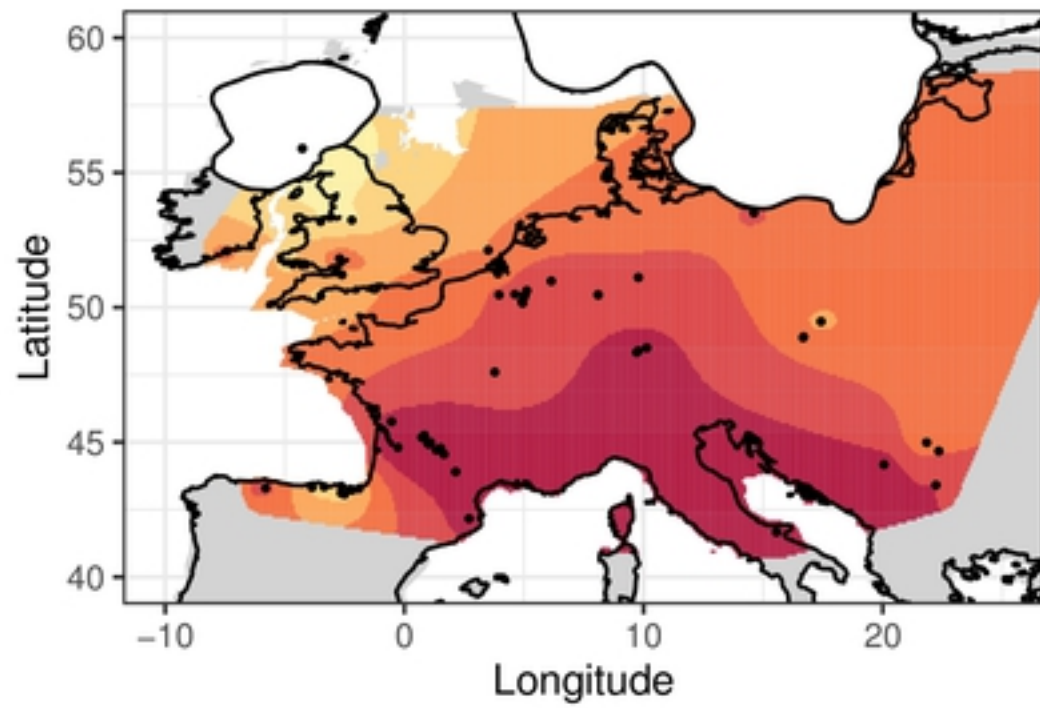

Early OIS 3

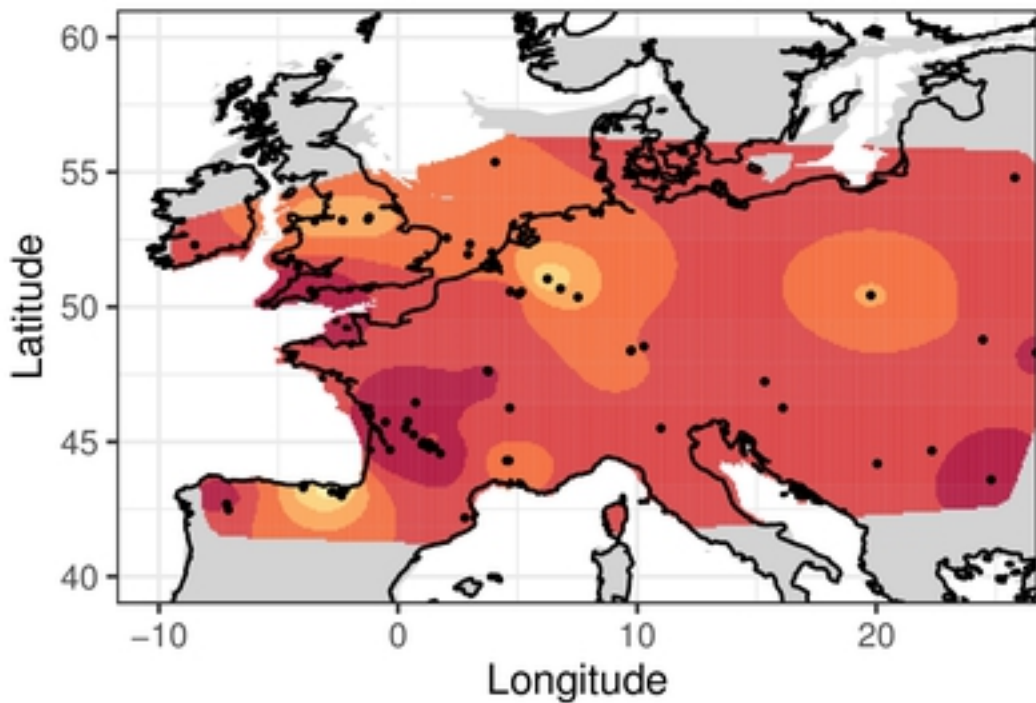

$\delta^{15}\text{N}$  (‰)

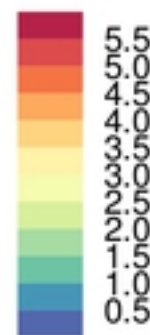

Figure3



Early Holocene

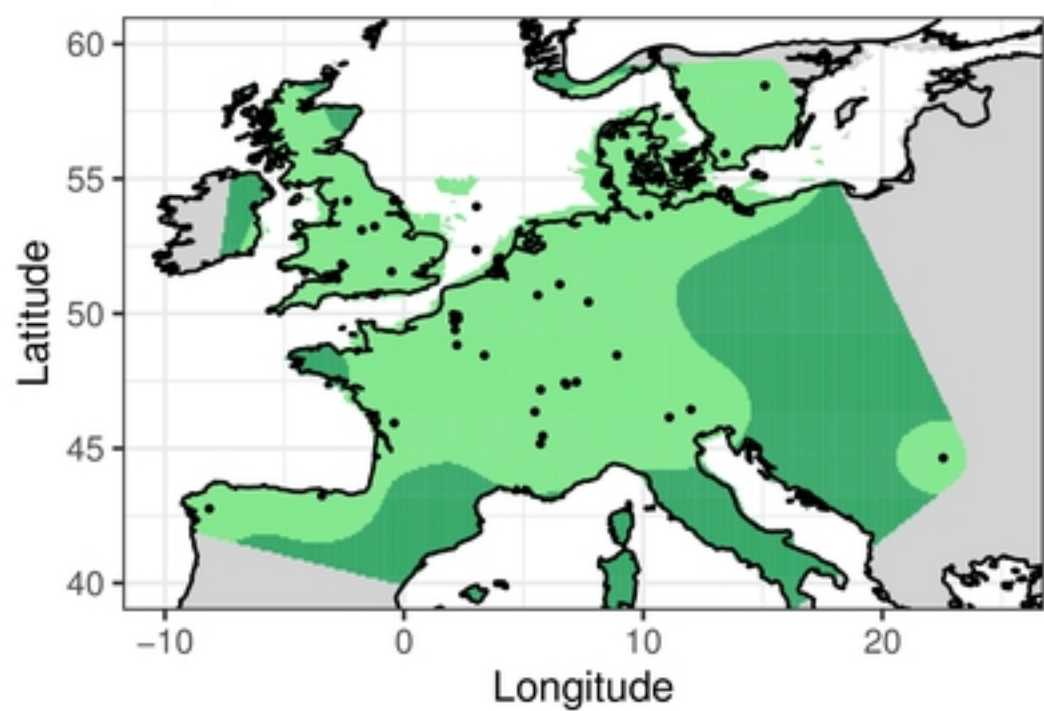

Younger Dryas

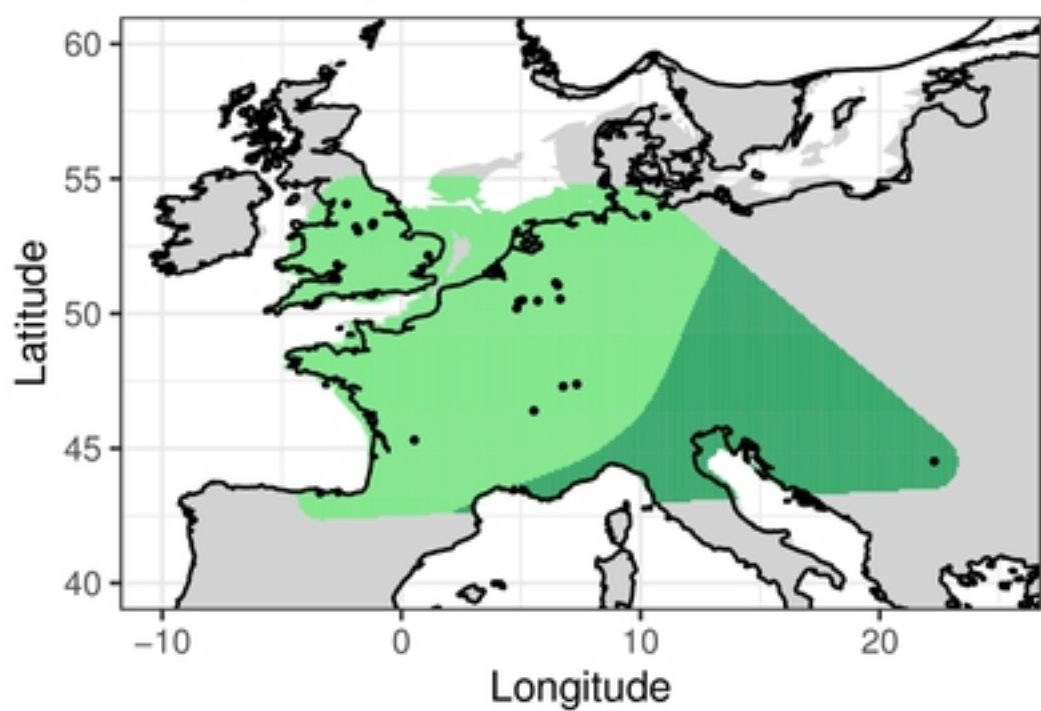

Late Glacial Interstadial

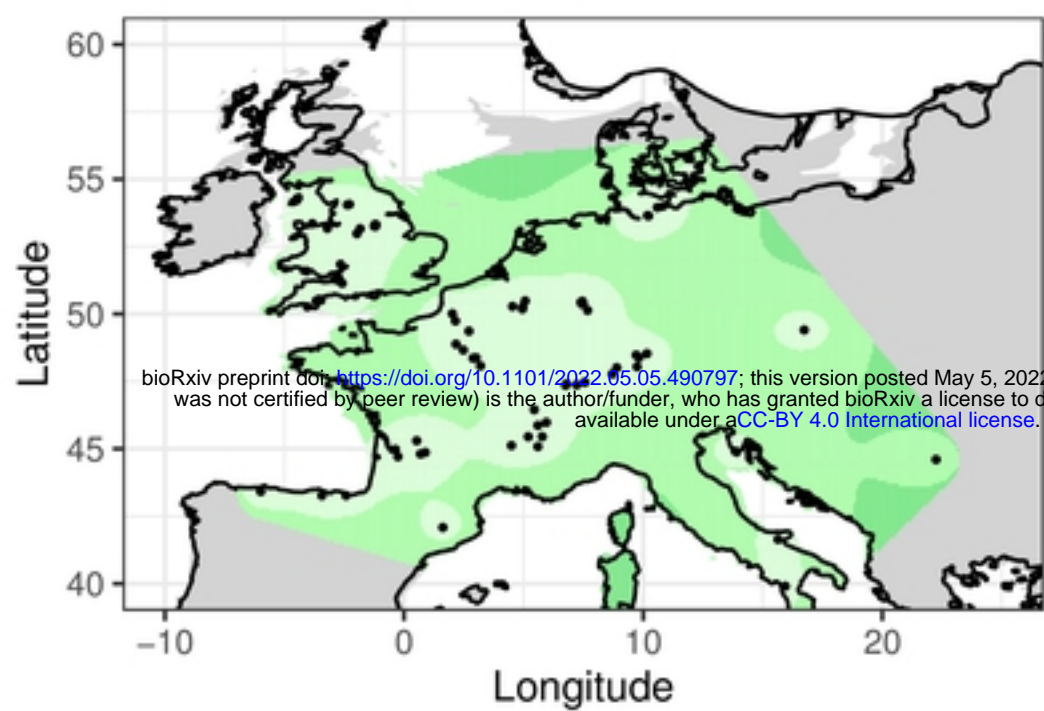

Last Glacial Termination

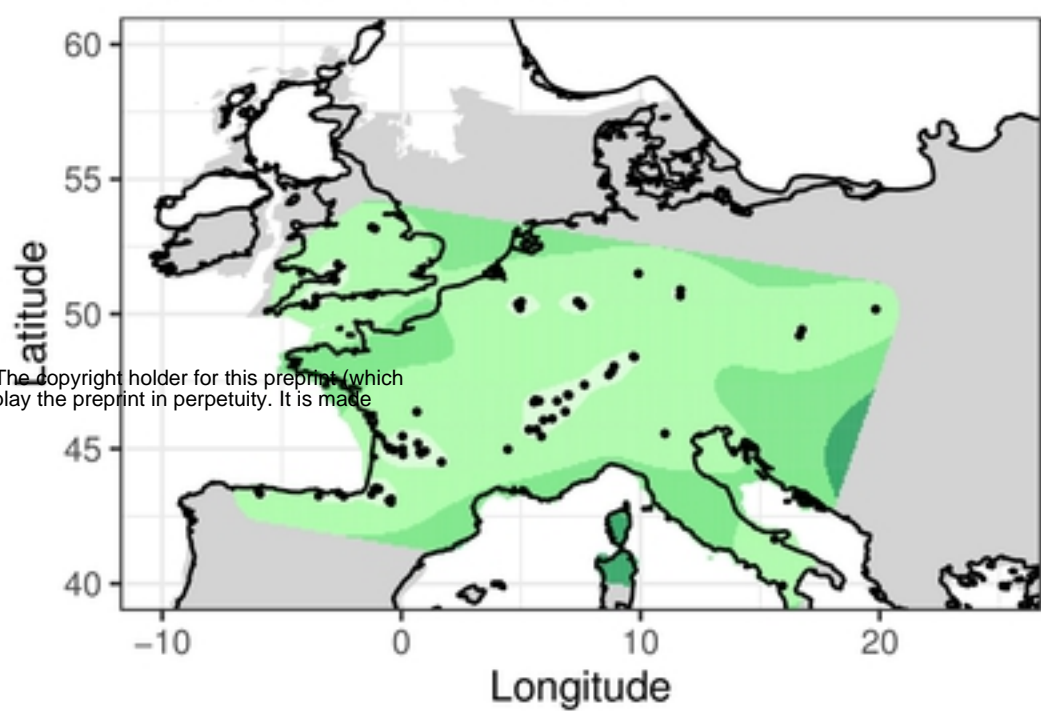

Last Glacial Maximum

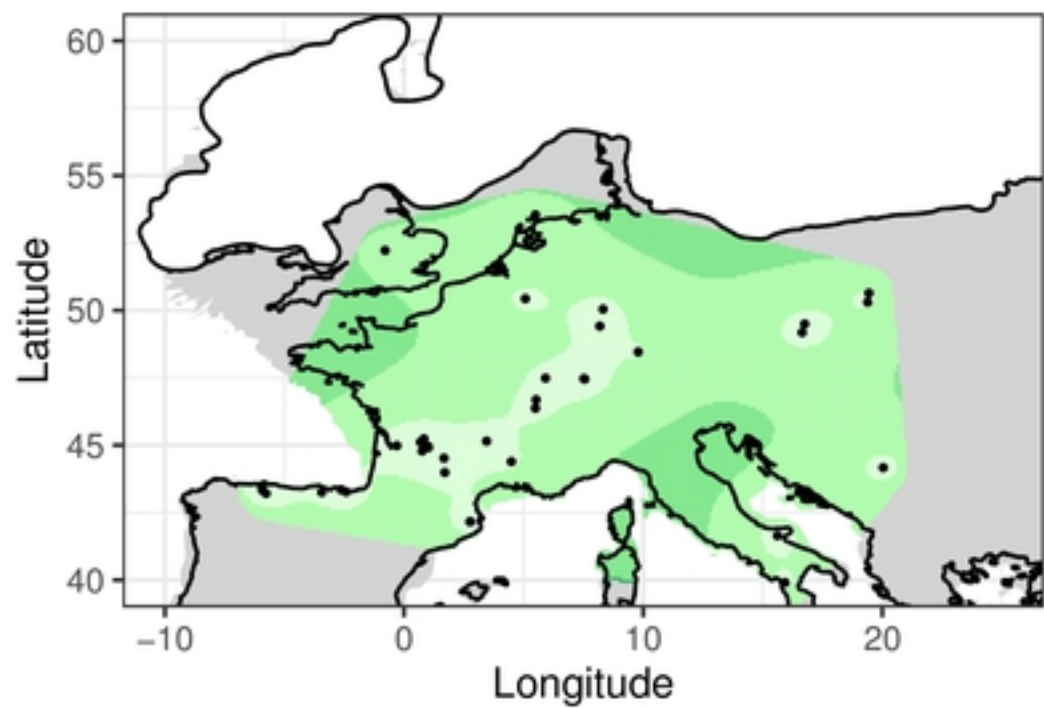

Late OIS 3

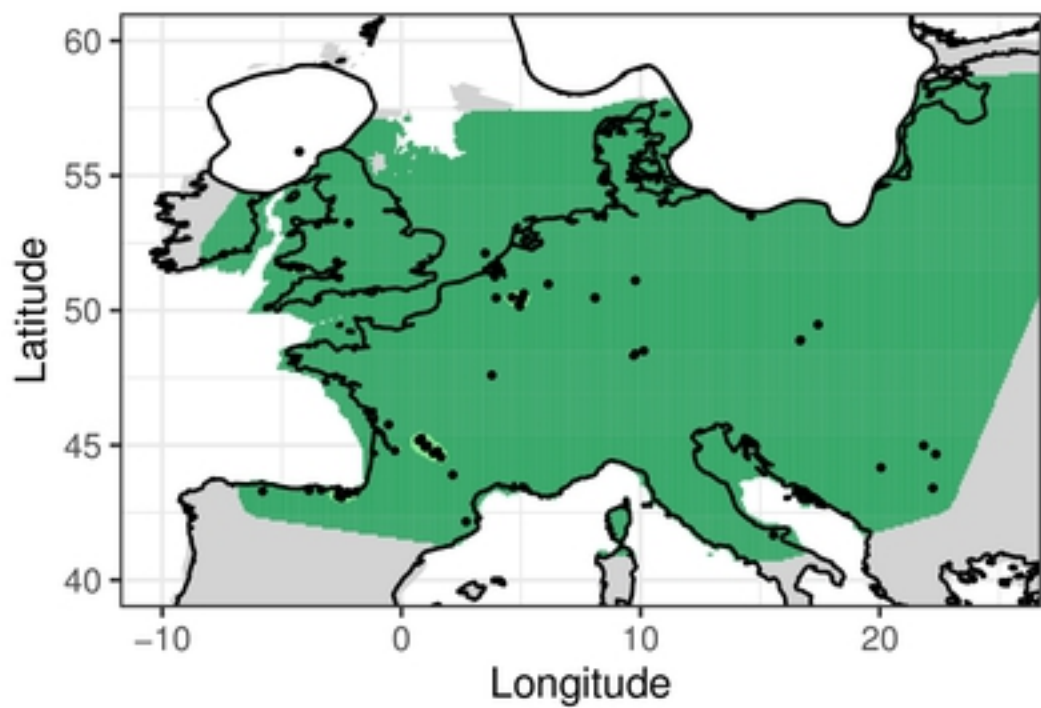

Early OIS 3

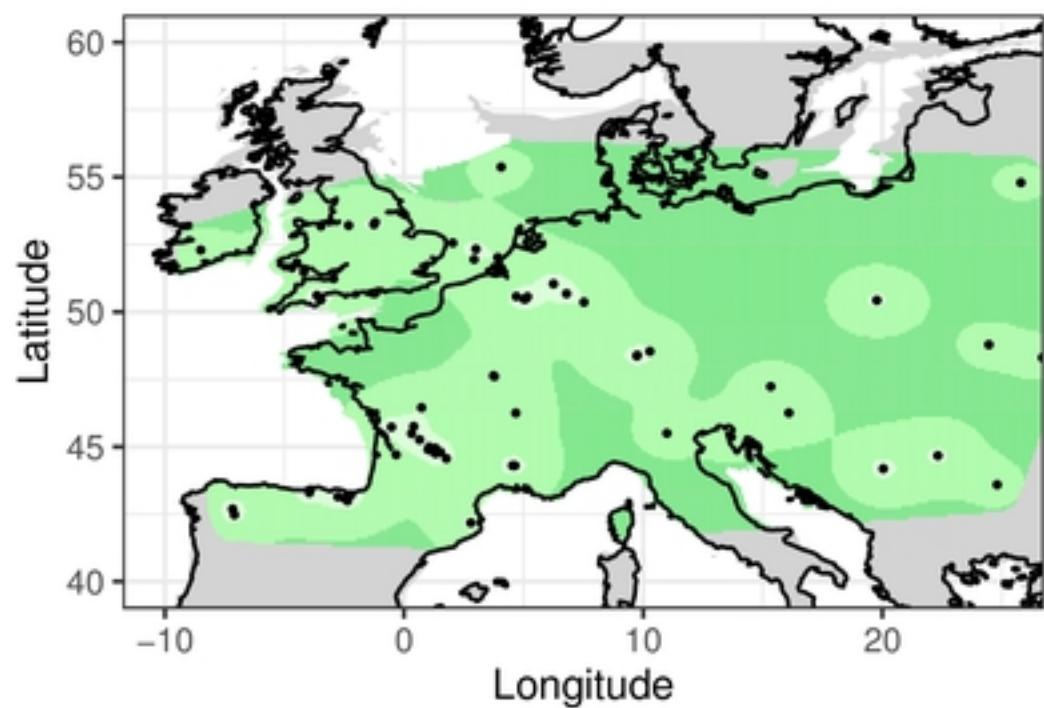

$\delta^{15}\text{N}$  (‰)

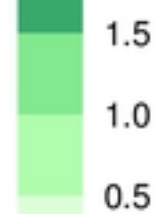

Figure4



### Early Holocene

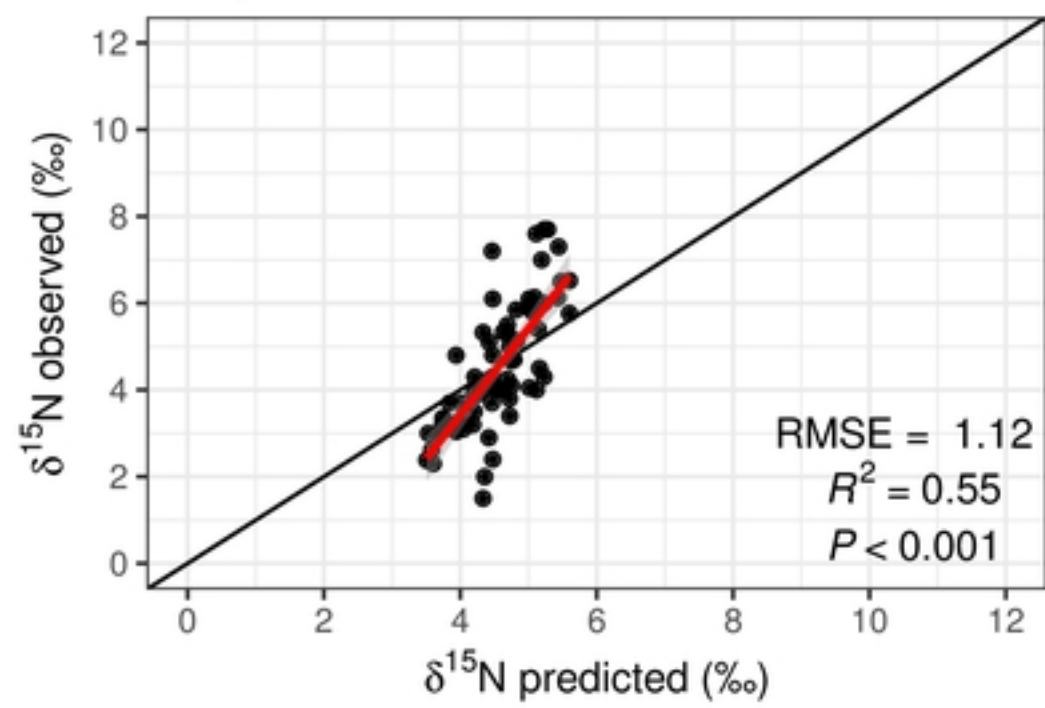

### Younger Dryas

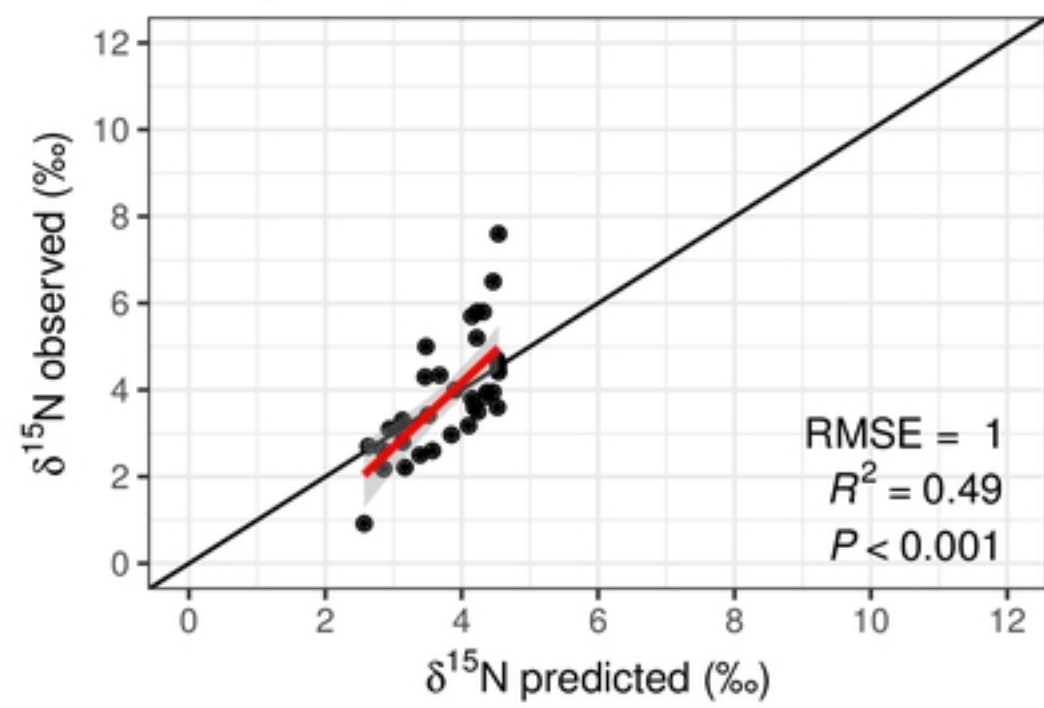

### Late Glacial Interstadial

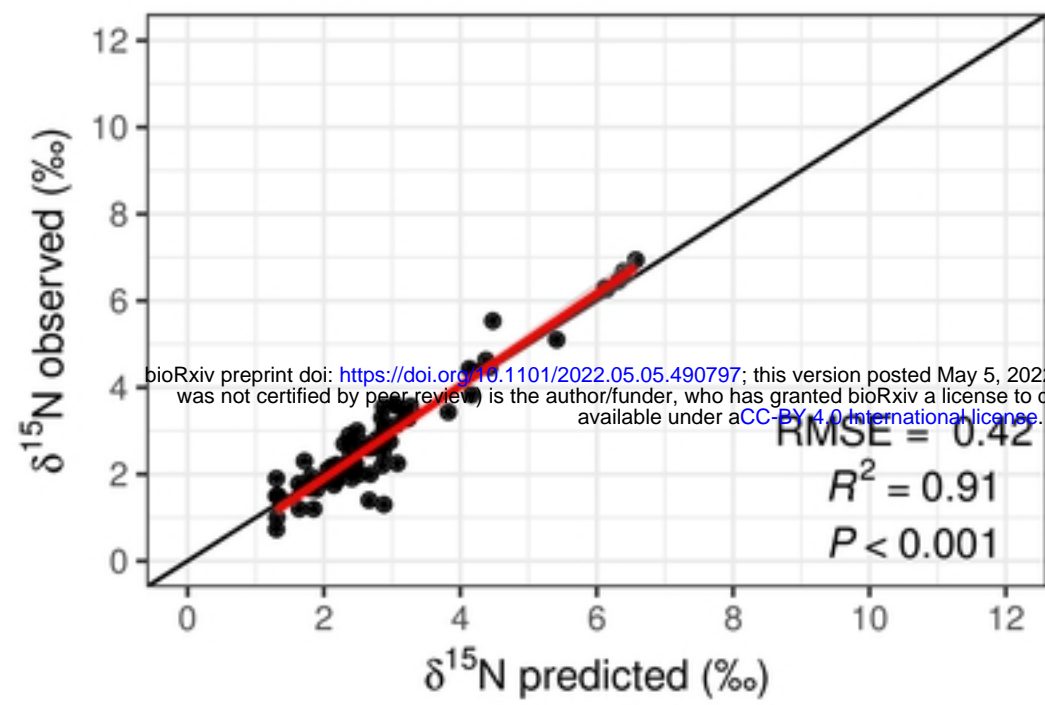

### Last Glacial Termination

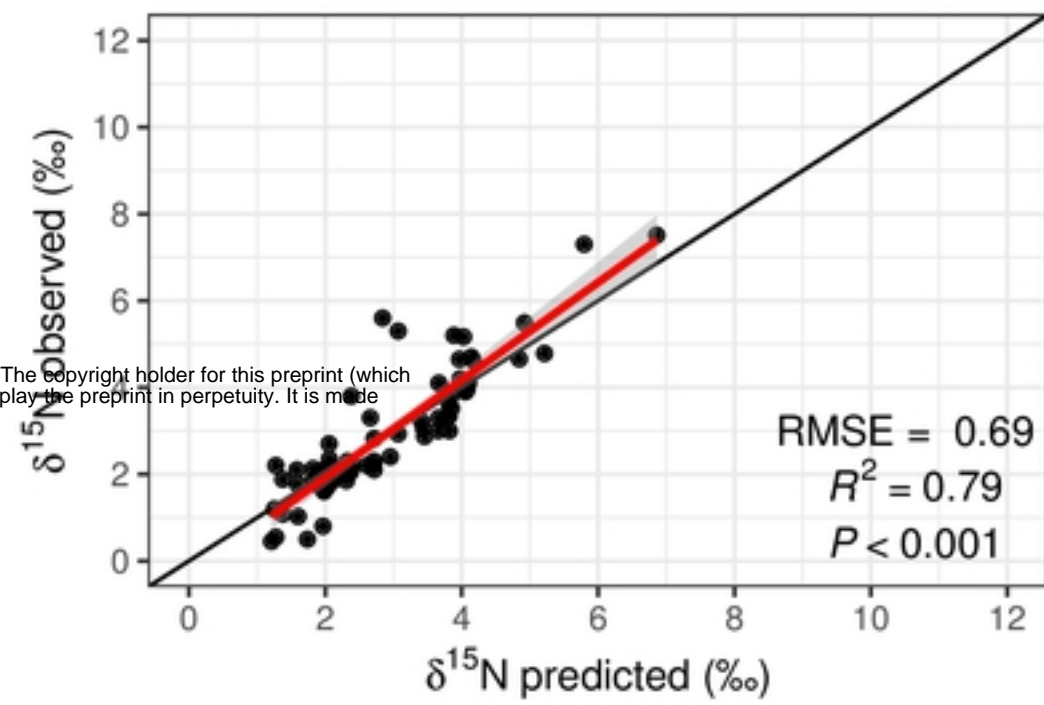

### Last Glacial Maximum

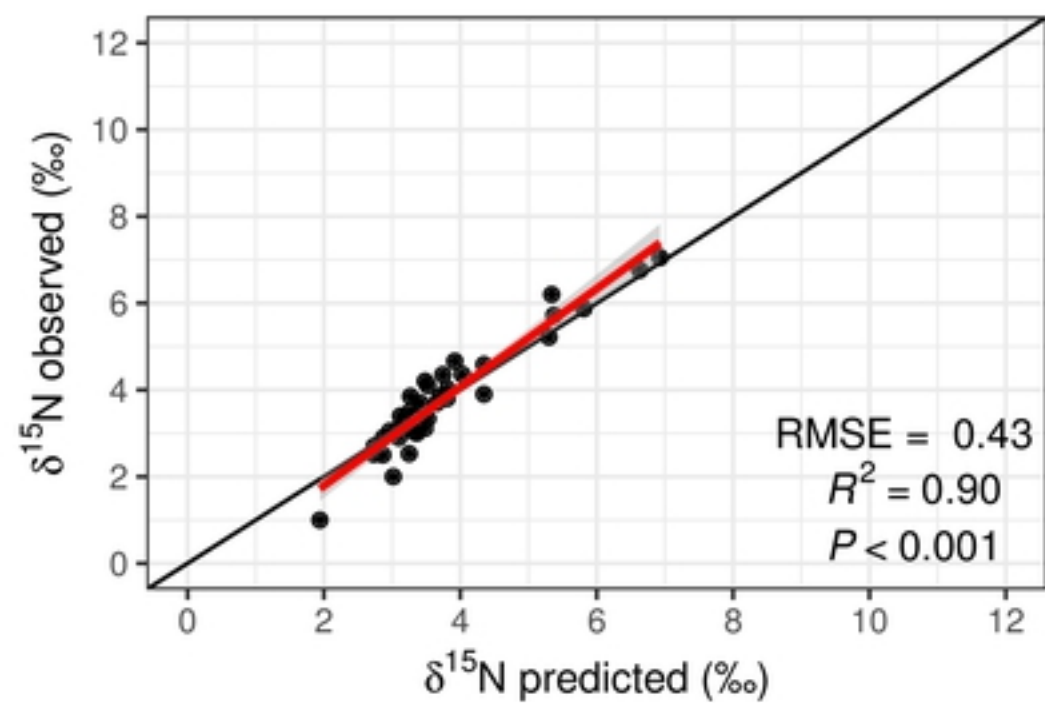

### Late OIS 3

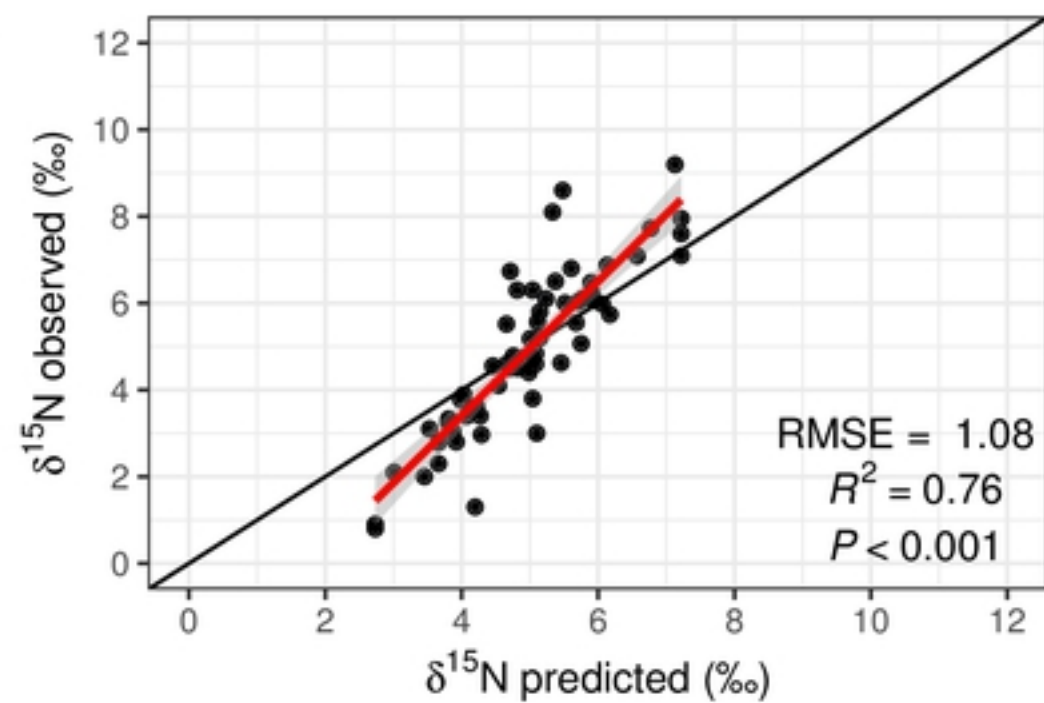

### Early OIS 3

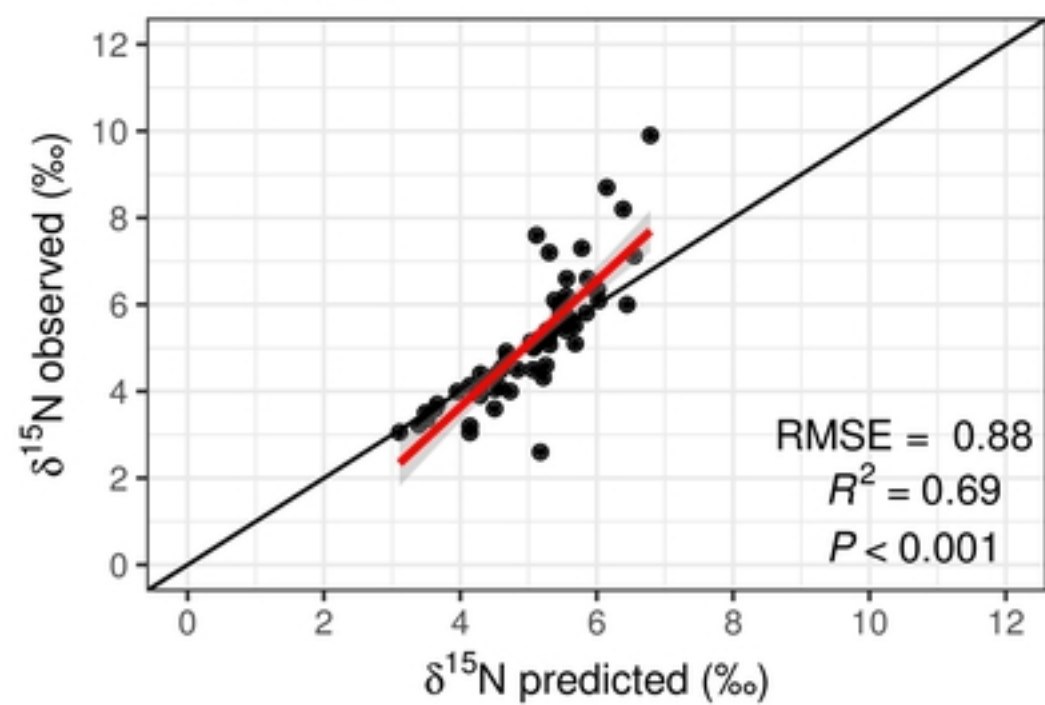

Figure 5



Early Holocene

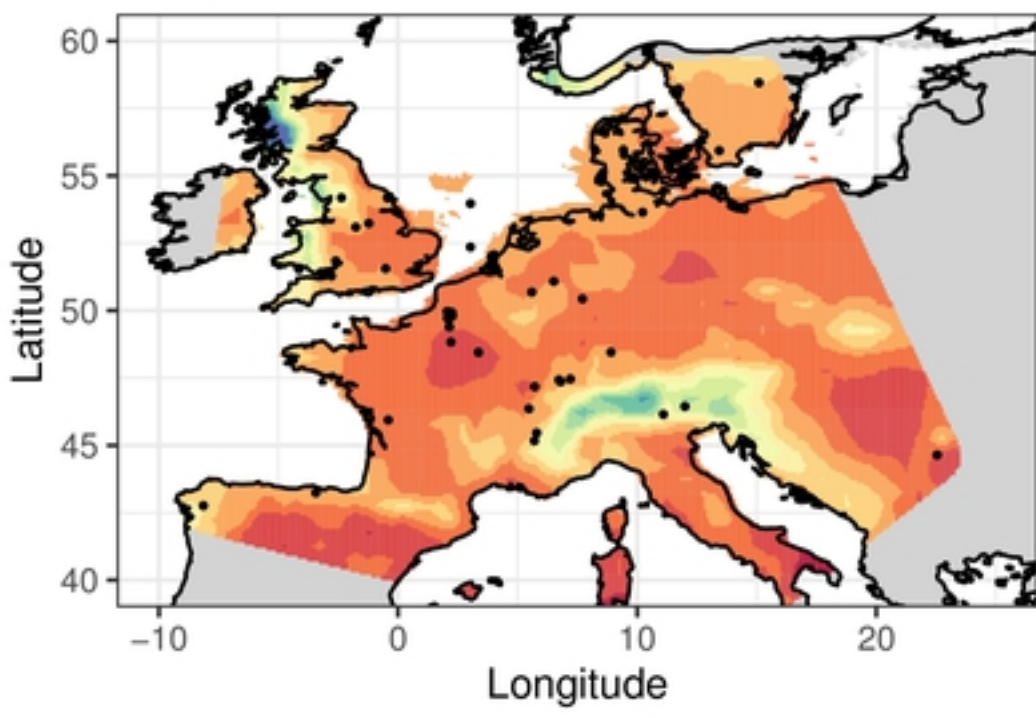

Younger Dryas

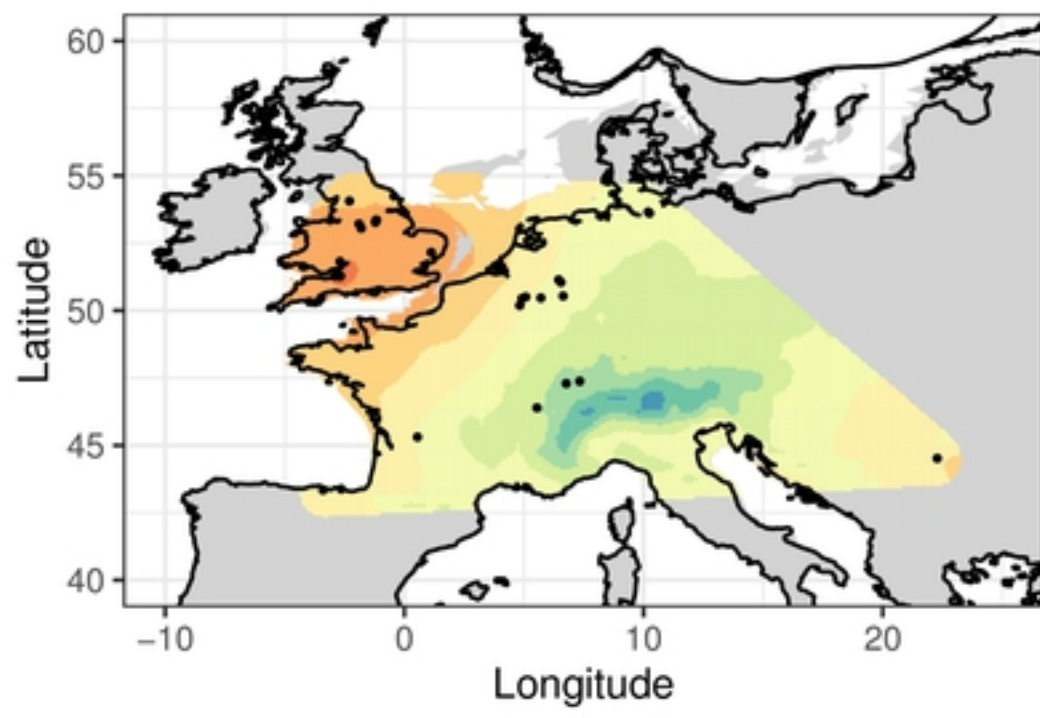

Late Glacial Interstadial

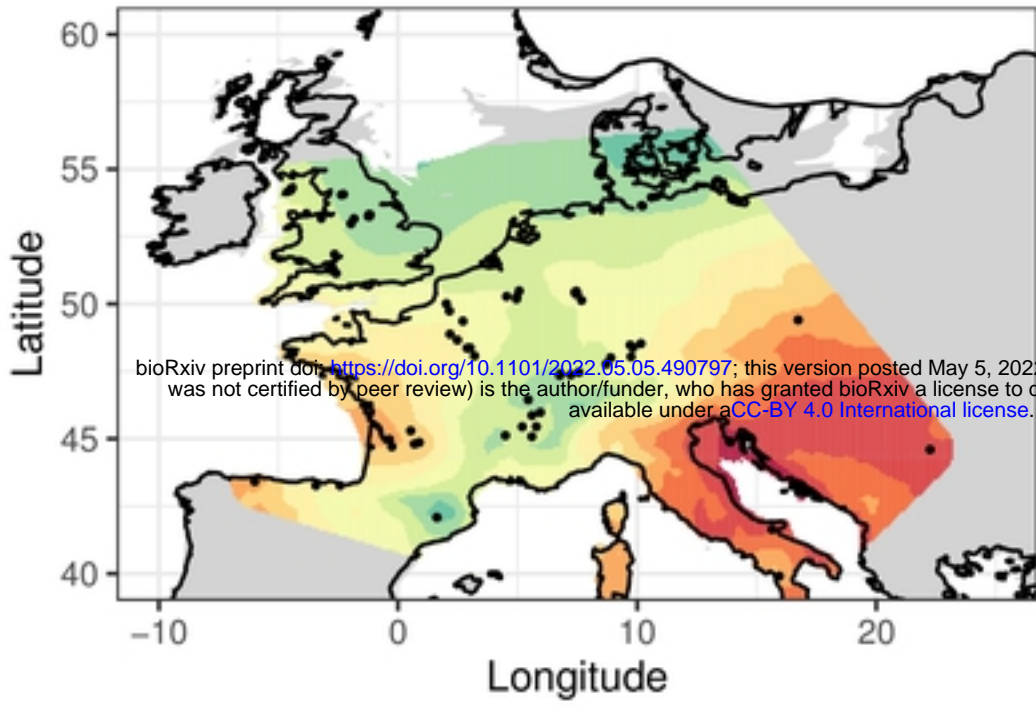

Last Glacial Termination

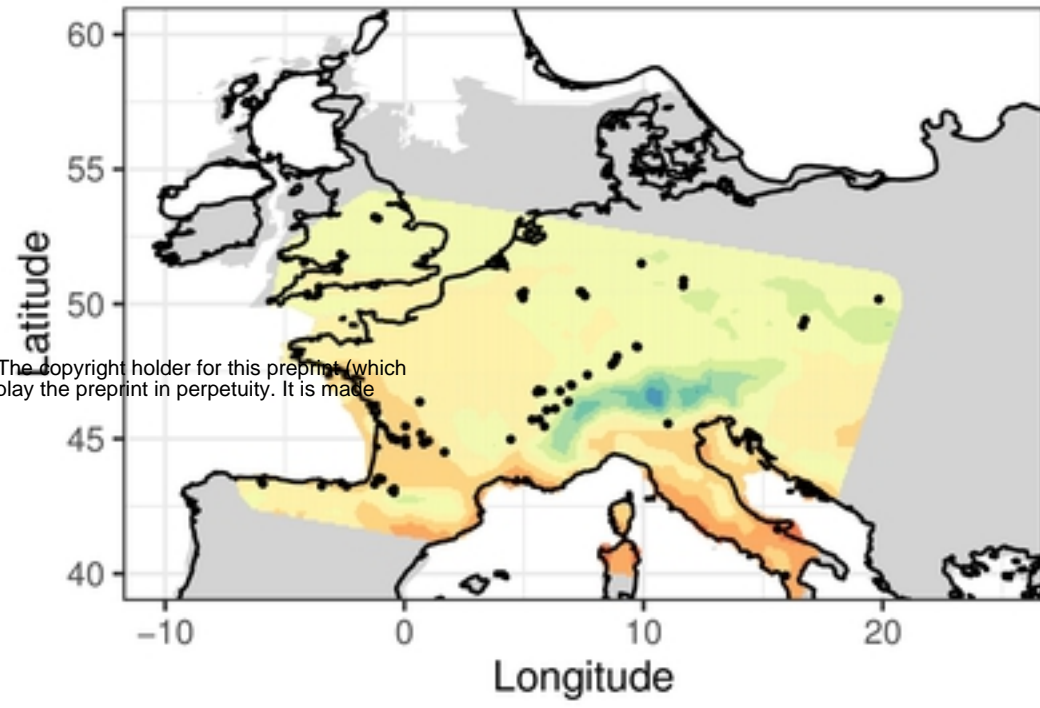

Last Glacial Maximum

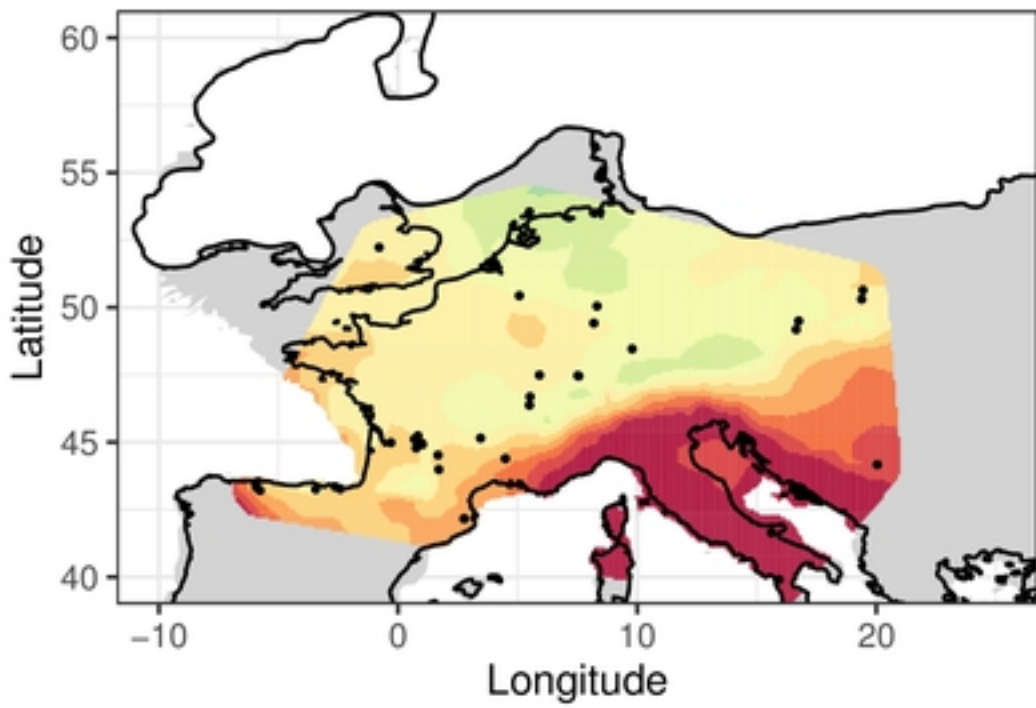

Late OIS 3

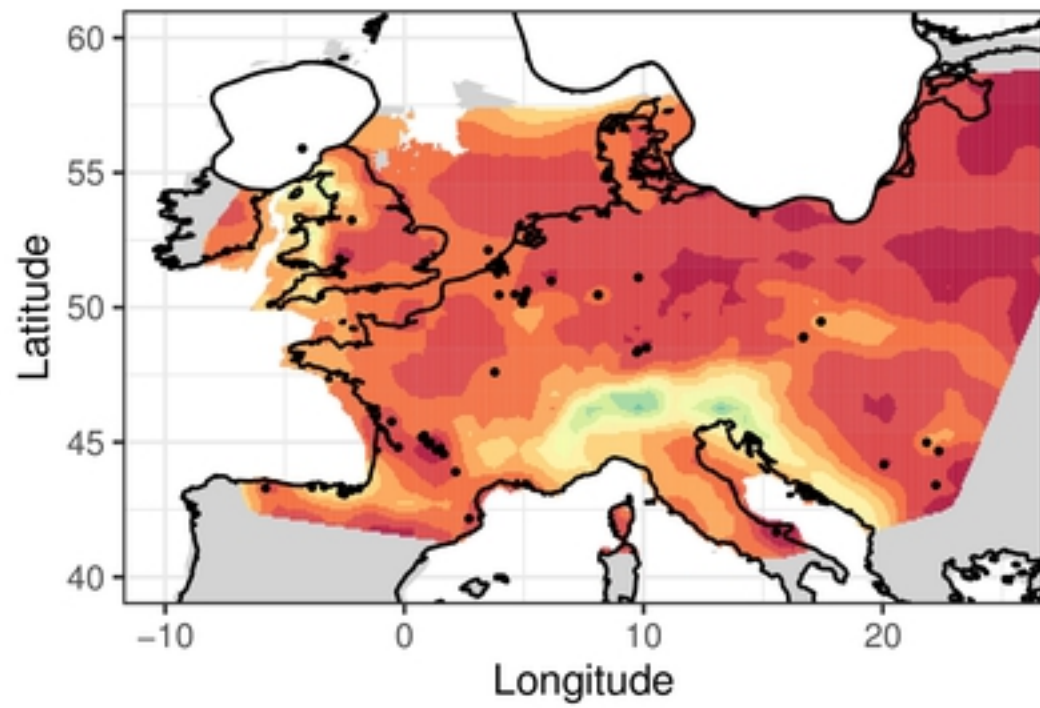

Early OIS 3

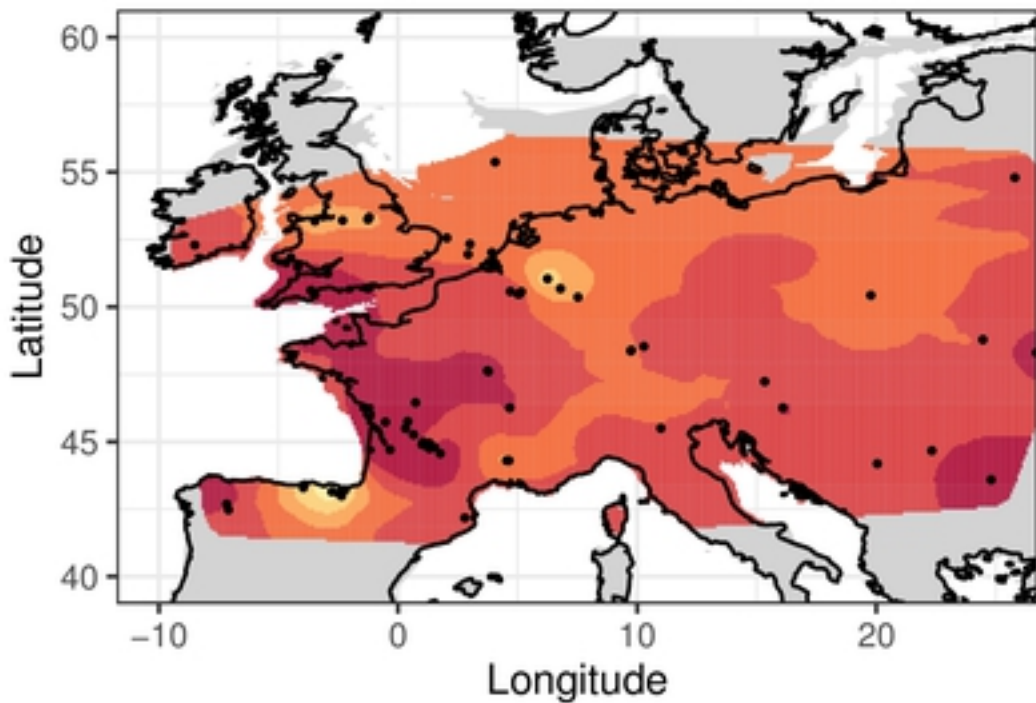

$\delta^{15}\text{N}$  (‰)

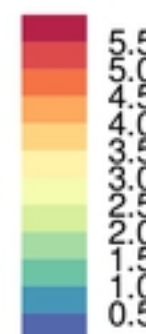

bioRxiv preprint doi: <https://doi.org/10.1101/2022.05.05.490797>; this version posted May 5, 2022. The copyright holder for this preprint (which was not certified by peer review) is the author/funder, who has granted bioRxiv a license to display the preprint in perpetuity. It is made available under aCC-BY 4.0 International license.

Figure6



Early Holocene

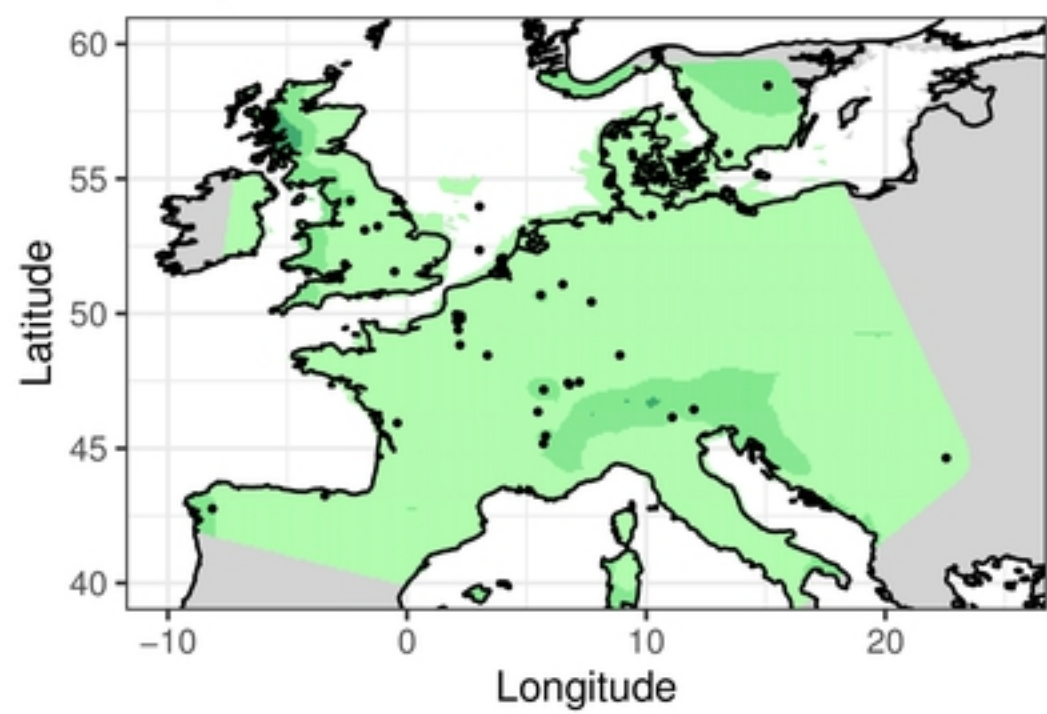

Younger Dryas

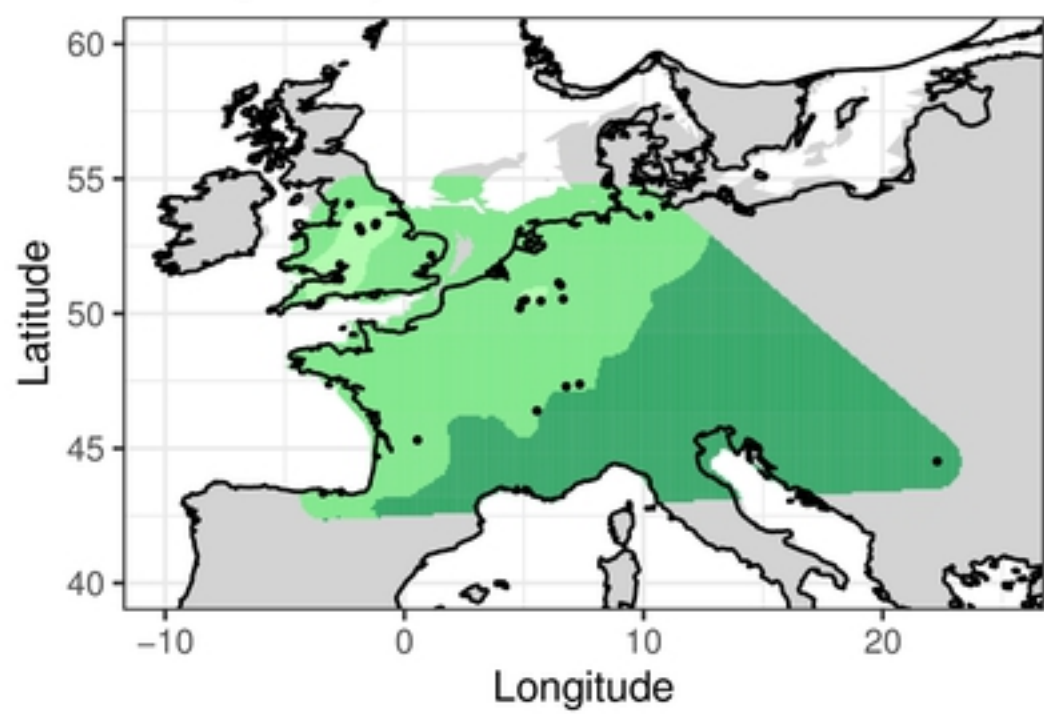

Late Glacial Interstadial

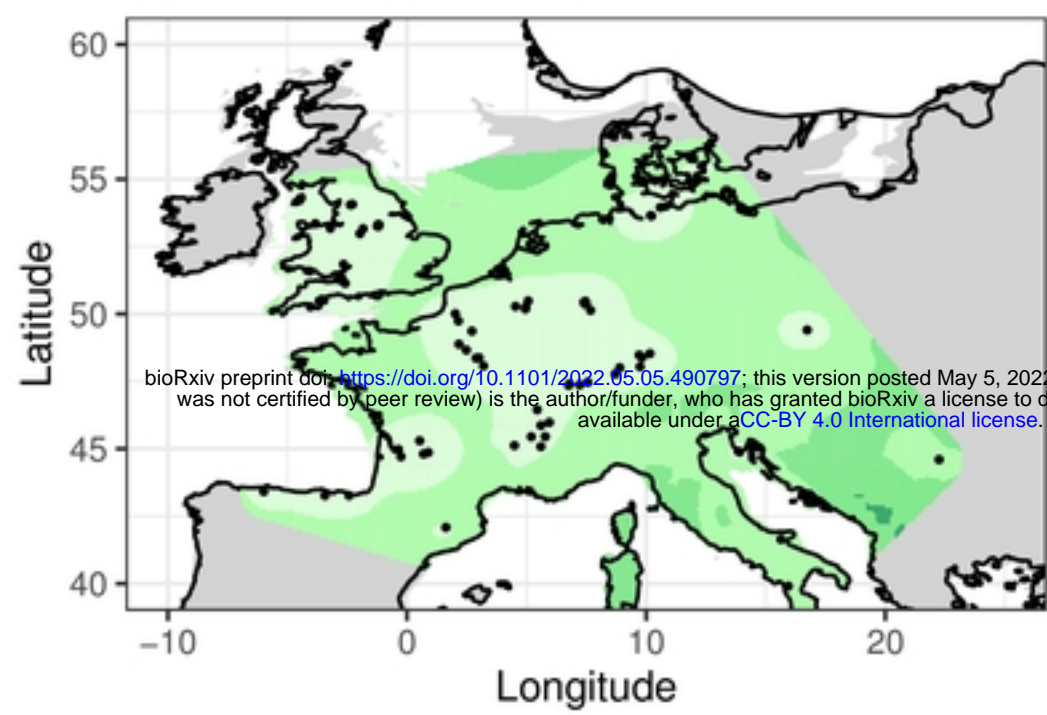

Last Glacial Termination

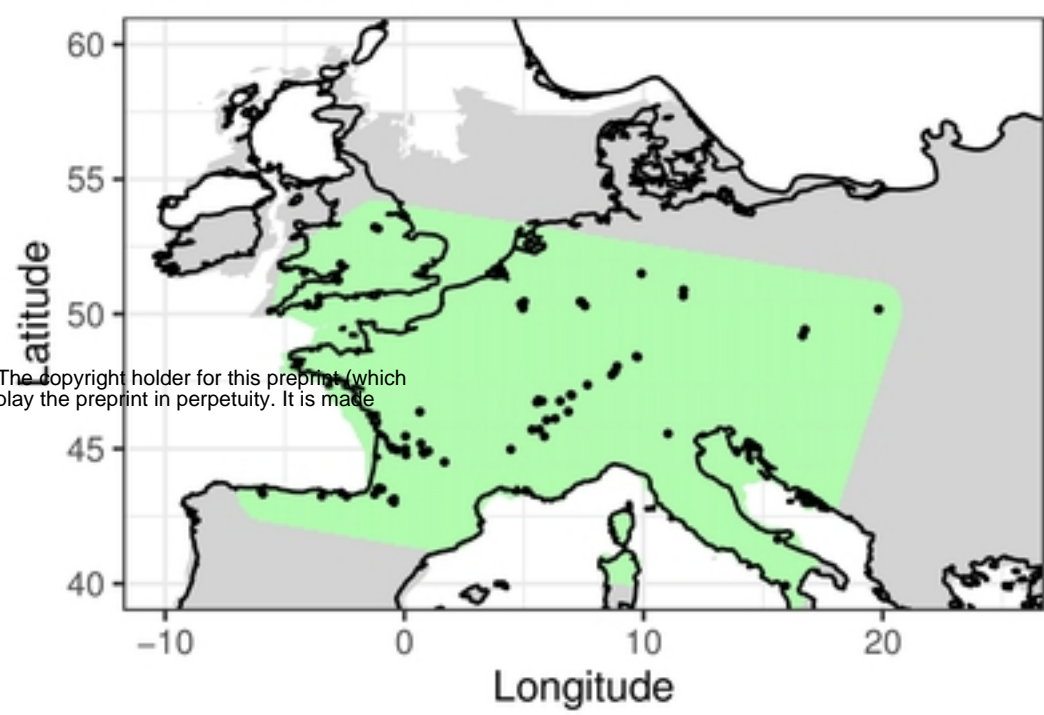

Last Glacial Maximum

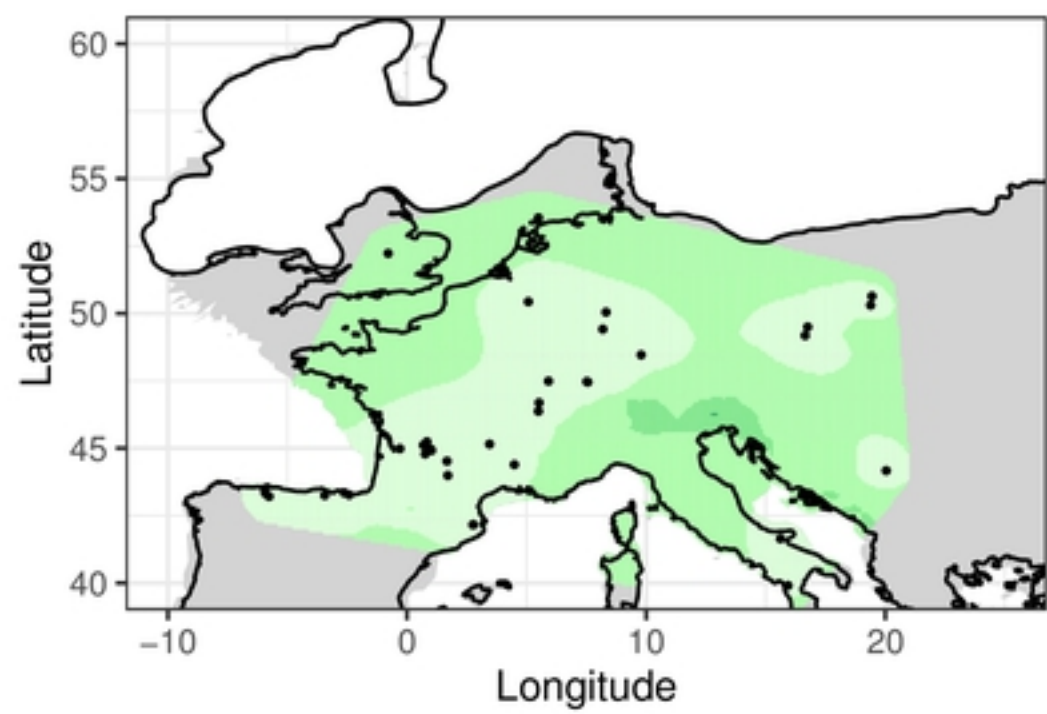

Late OIS 3

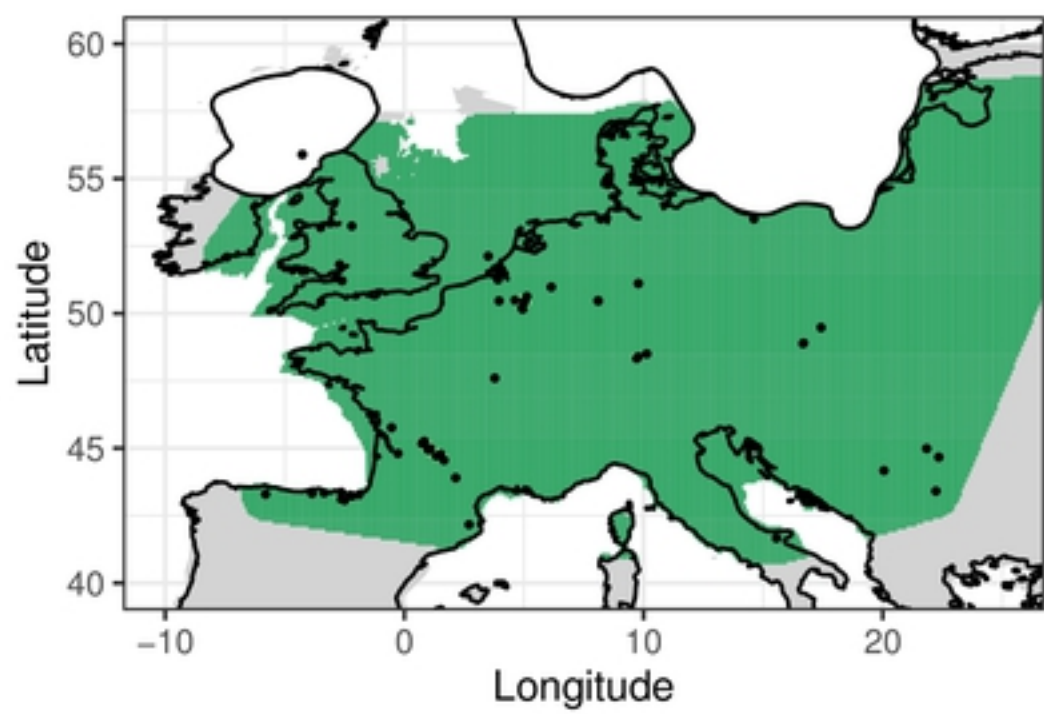

Early OIS 3

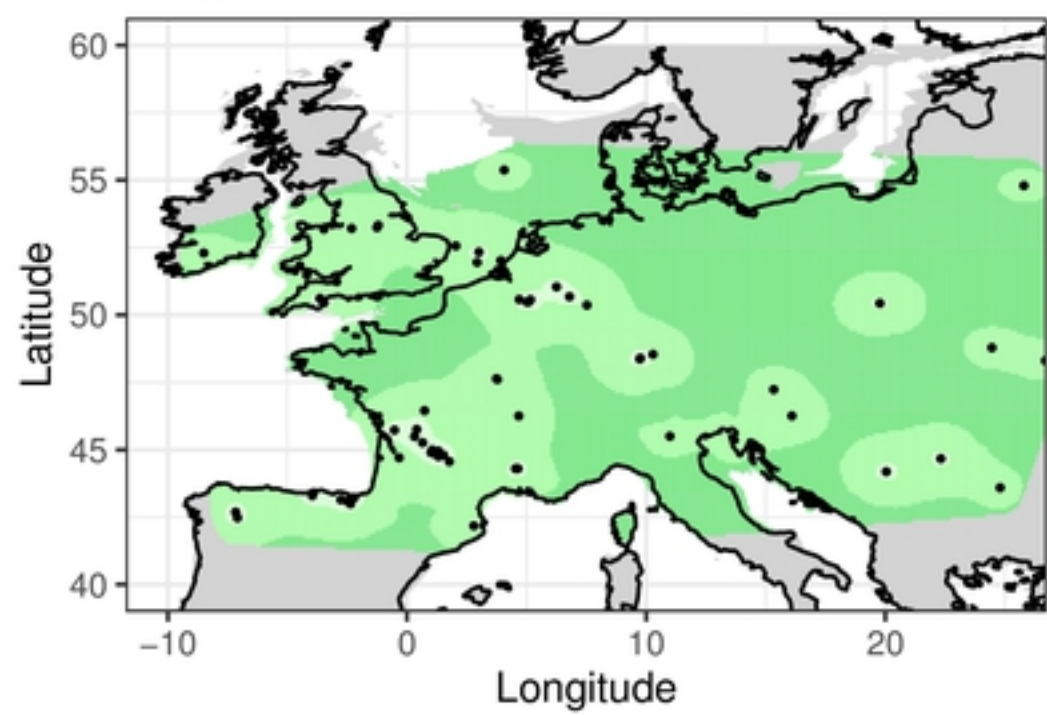

$\delta^{15}\text{N}$  (‰)

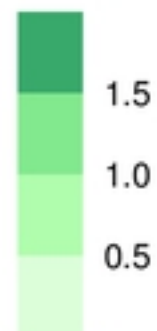

Figure7



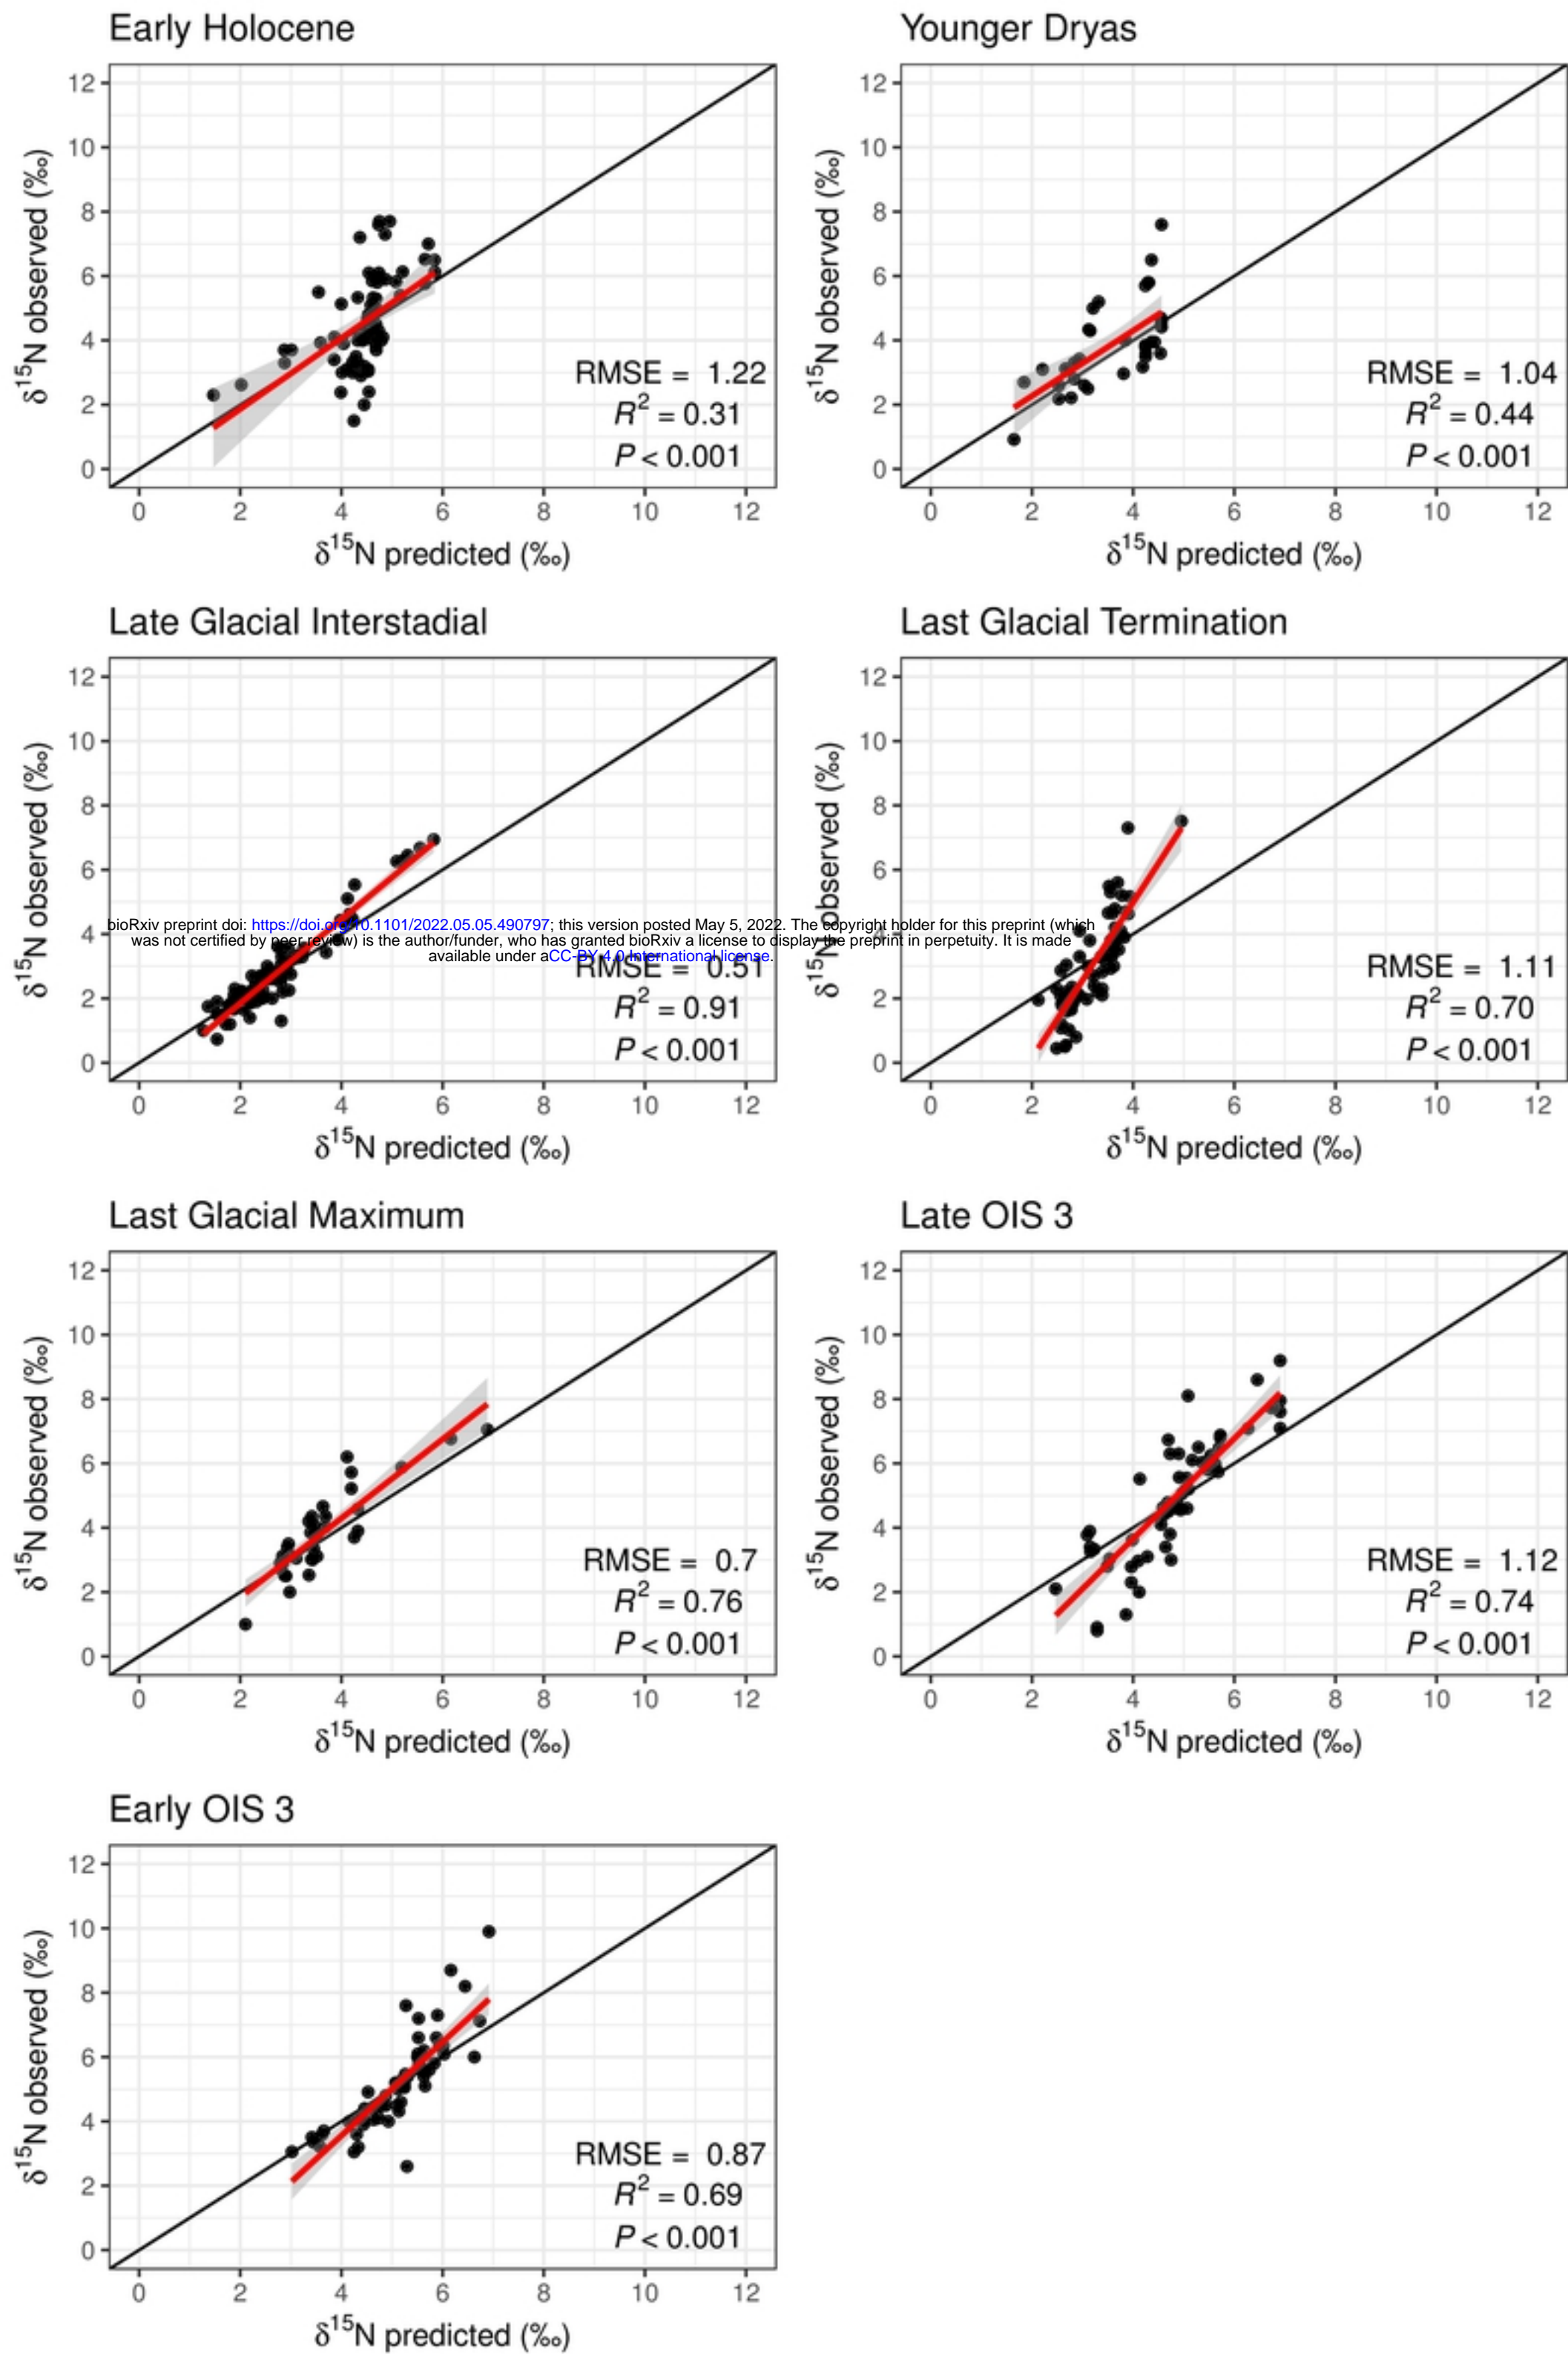

Figure8

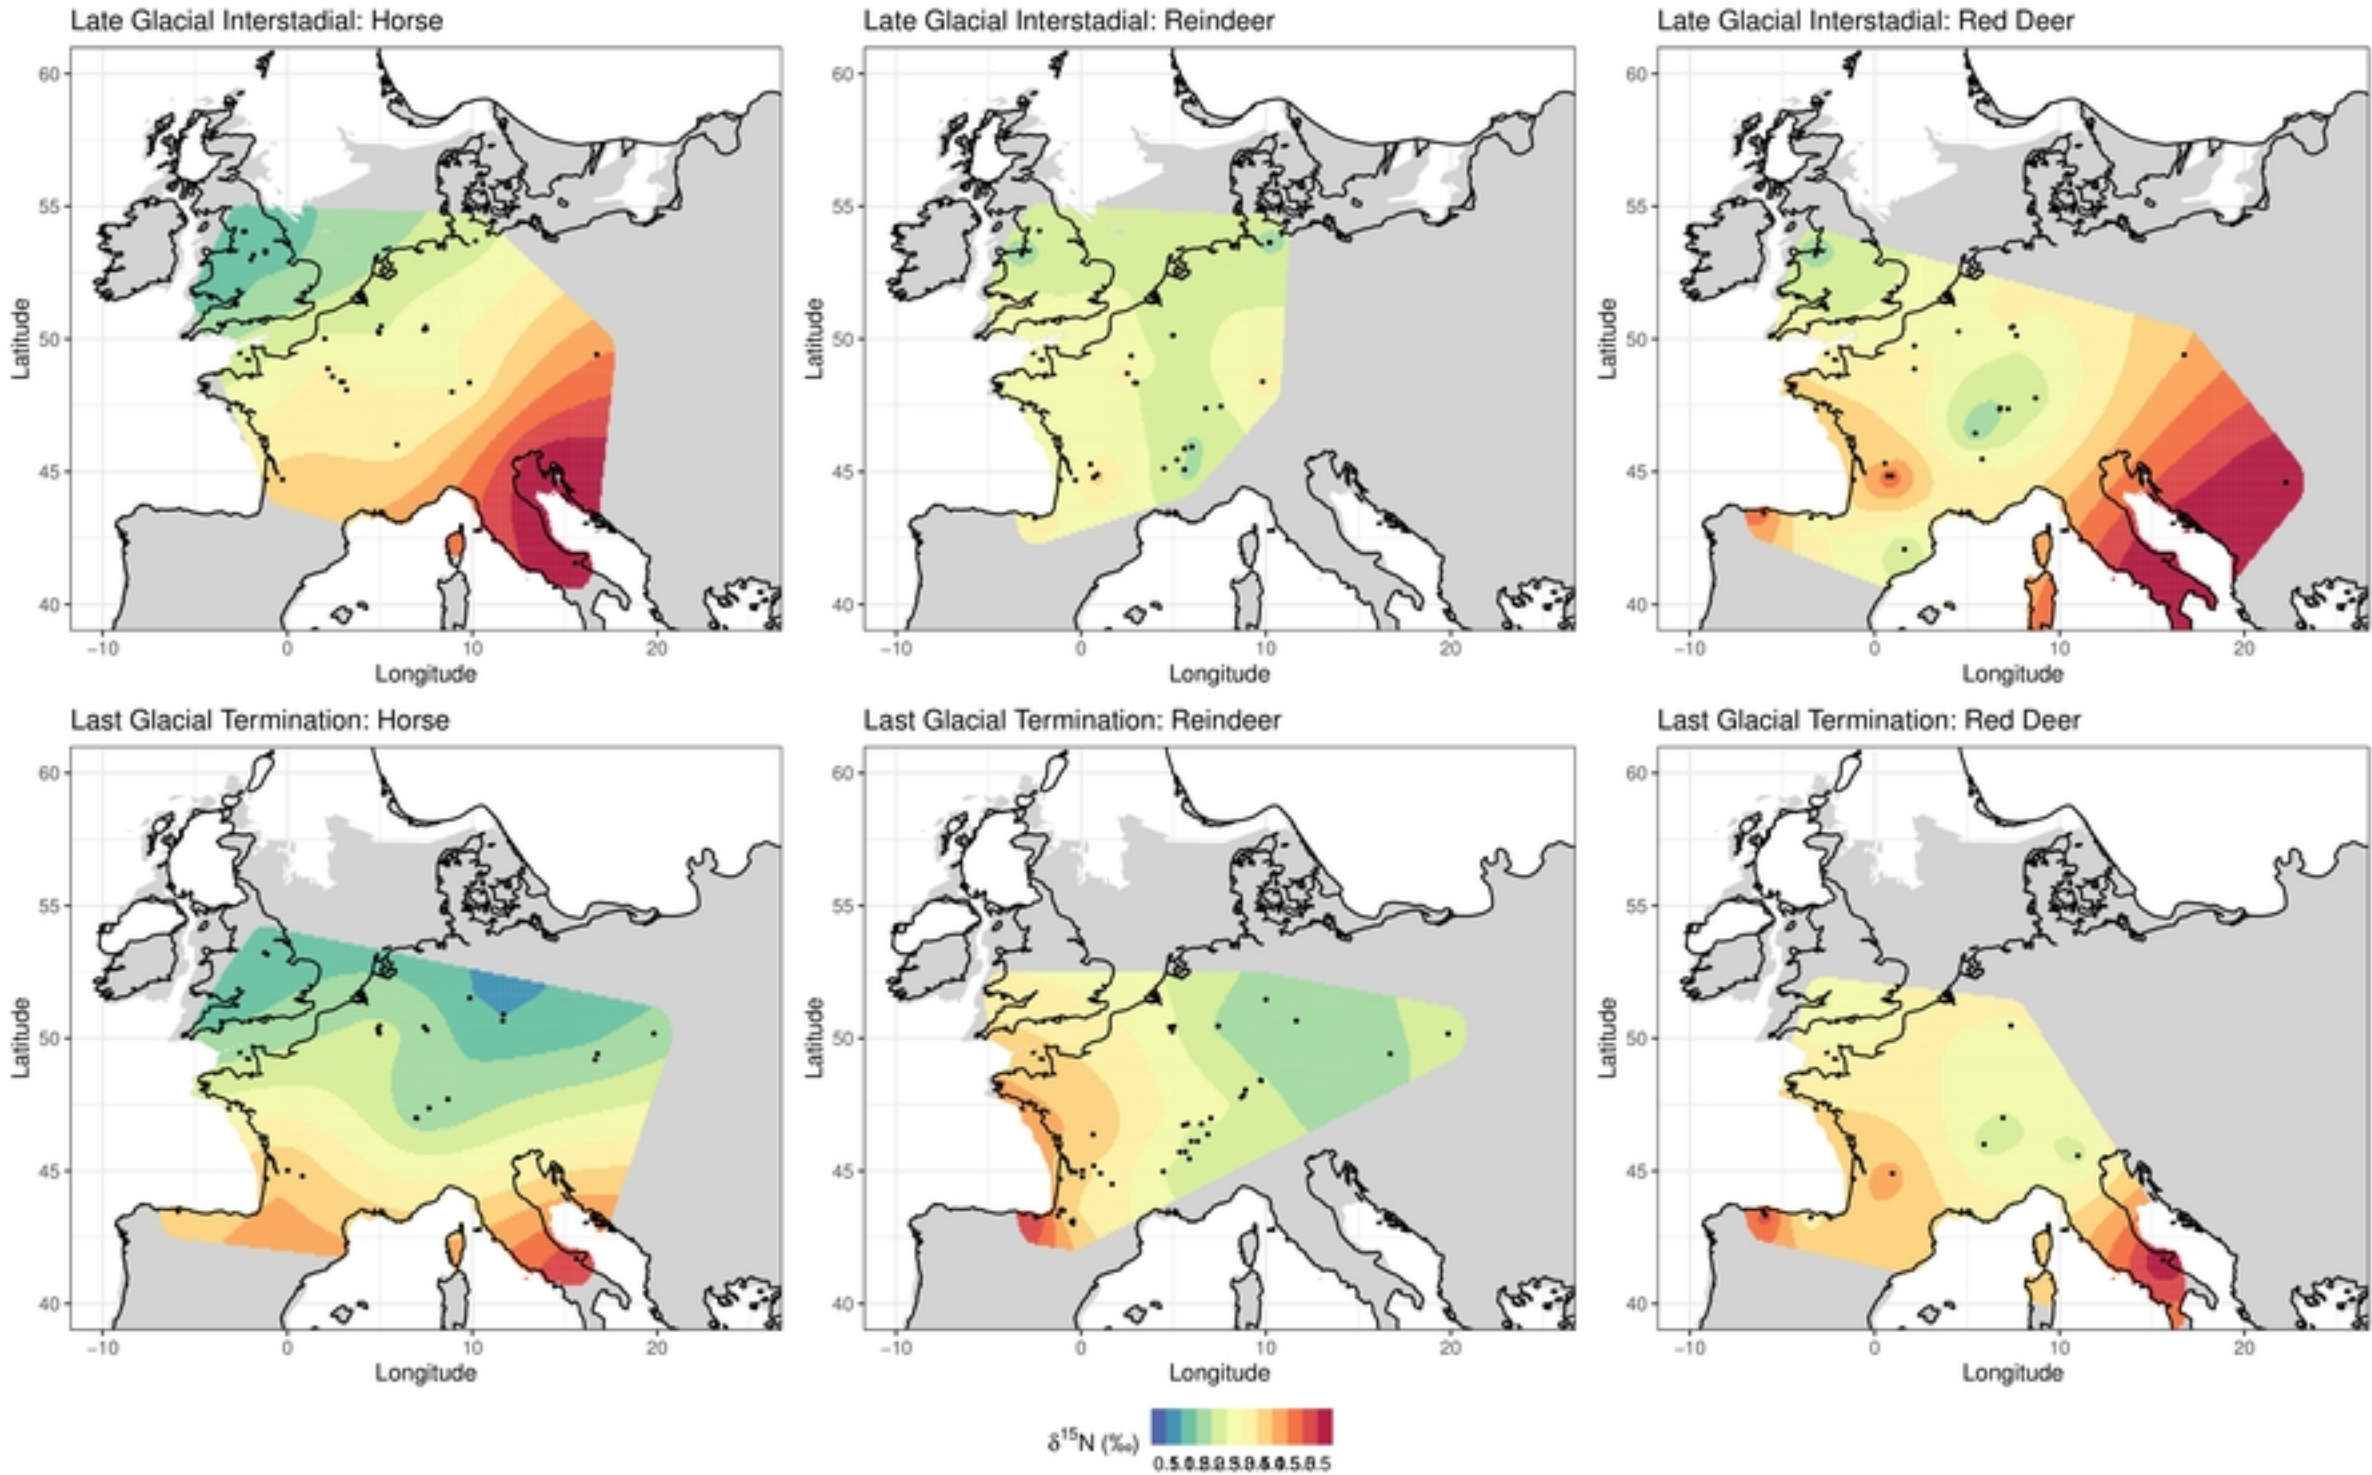

Figure9



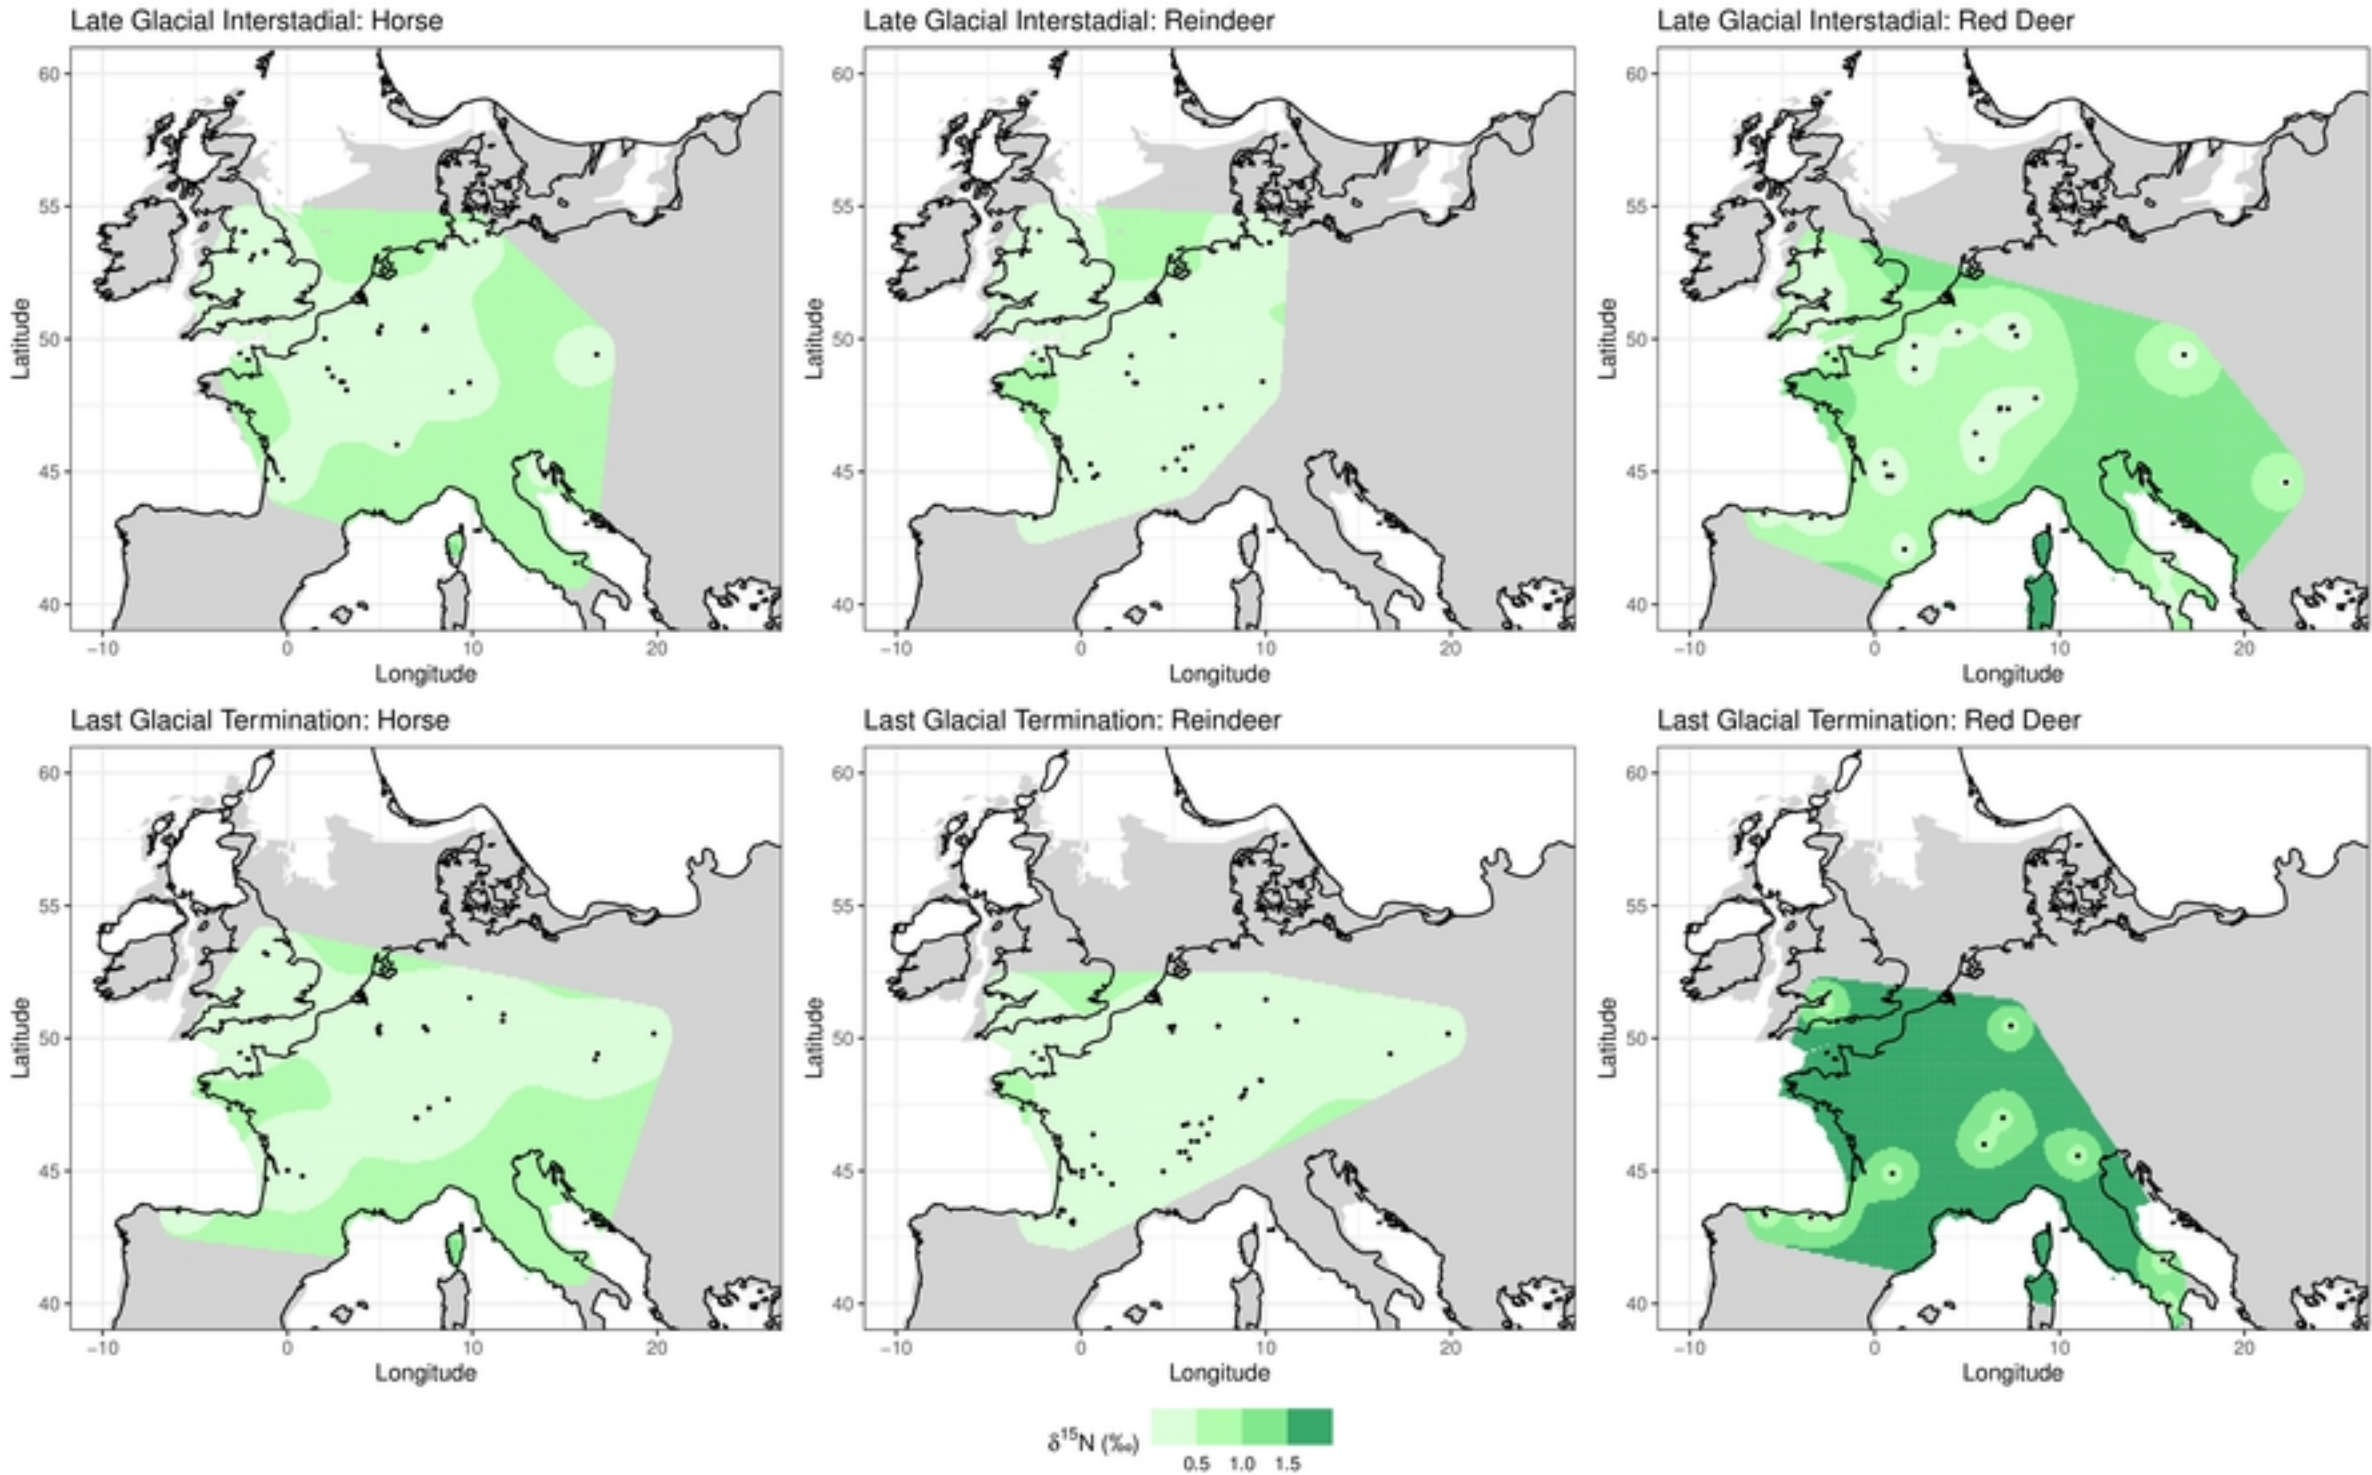

Figure 10
